# Supplementary material
Source: Research Square preprint supplement (doi:10.21203/rs.3.rs-9882196/v1)
Supplement: Supplementary file 1 [file 2fba4cbabddfee883ae0d0de.docx]

**Supplementary Material**

**Fourteen years of Alpine Forest Genomics Network (AForGeN): Advances in the research field and perspectives ahead**

# S1 Web of science literature search

The following terms were searched on 09.01.2025 in title, abstract and key words to retrieve publications from the Web of Science (ClarivateTM):

PY=(2000-2024)

AND

(

(AB=("Pinus cembra" OR "Pinus mugo" OR "Pinus sibirica" OR "Larix decidua" OR "Larix sibirica" OR "Abies alba" OR "Picea abies" ) OR TI=("Pinus cembra" OR "Pinus mugo" OR "Pinus sibirica" OR "Larix decidua" OR "Larix sibirica" OR "Abies alba" OR "Picea abies" ) OR AK=("Pinus cembra" OR "Pinus mugo" OR "Pinus sibirica" OR "Larix decidua" OR "Larix sibirica" OR "Abies alba" OR "Picea abies" ))

)

AND

(

(AB=(genom* OR genet*) OR TI=(genom* OR genet*) OR AK=(genom* OR genet*))

)

# S2 Topic models and average NPMI as coherence measure of the topic models


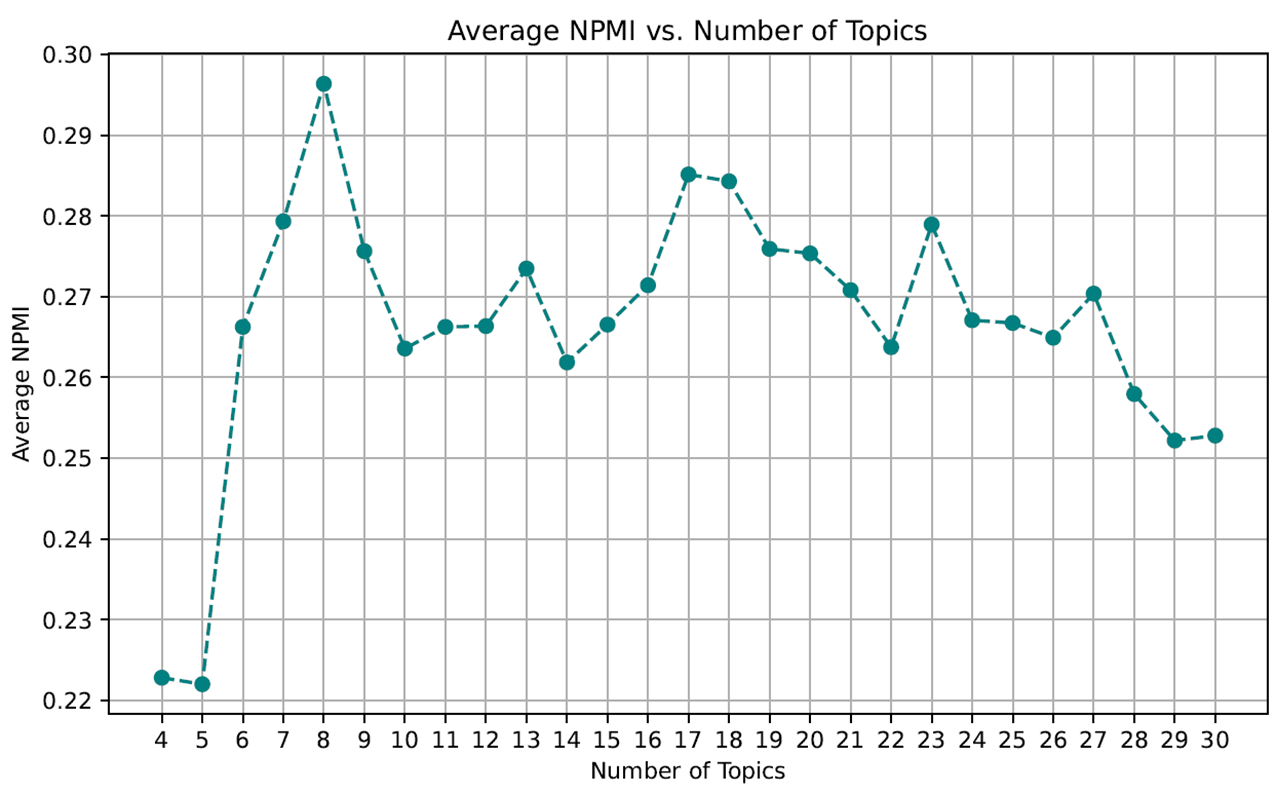


**Figure S2.1** The average NPMI values for topic models identified for the 662 publications included in the bibliometric analyses. Peaks for topic models comprising 8 and 17 topics respectively indicate high coherence


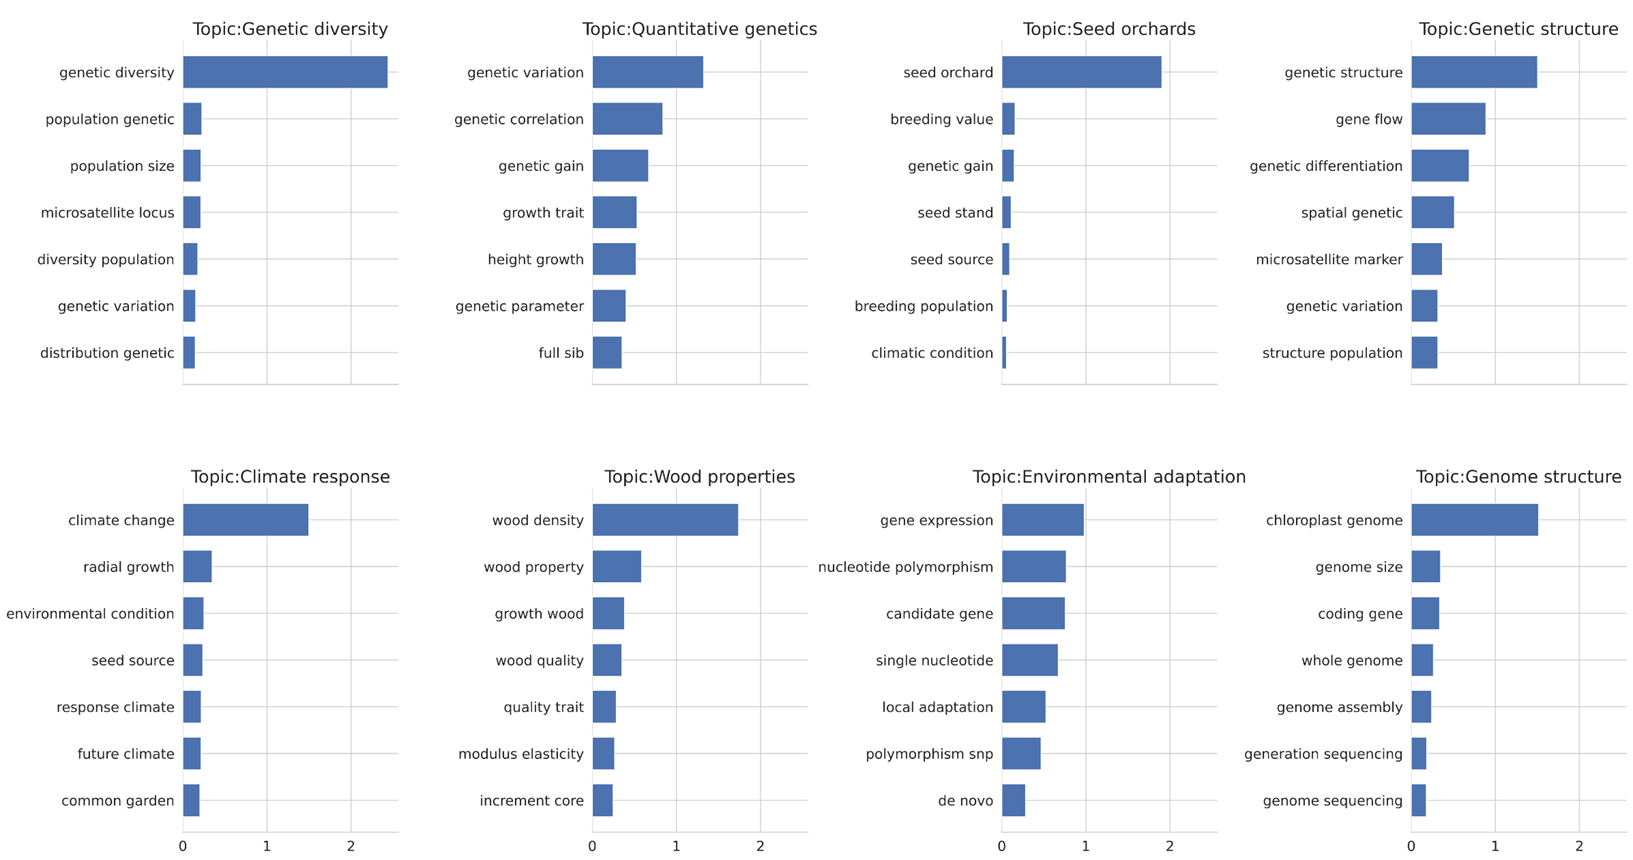


**Figure S 2.2** Topic model with eight topics identified based on the co-occurrence of pairs of words in abstract and title of 662 publications. The topic titles were assigned by the authors based on the word pairs with high priority in each topic.


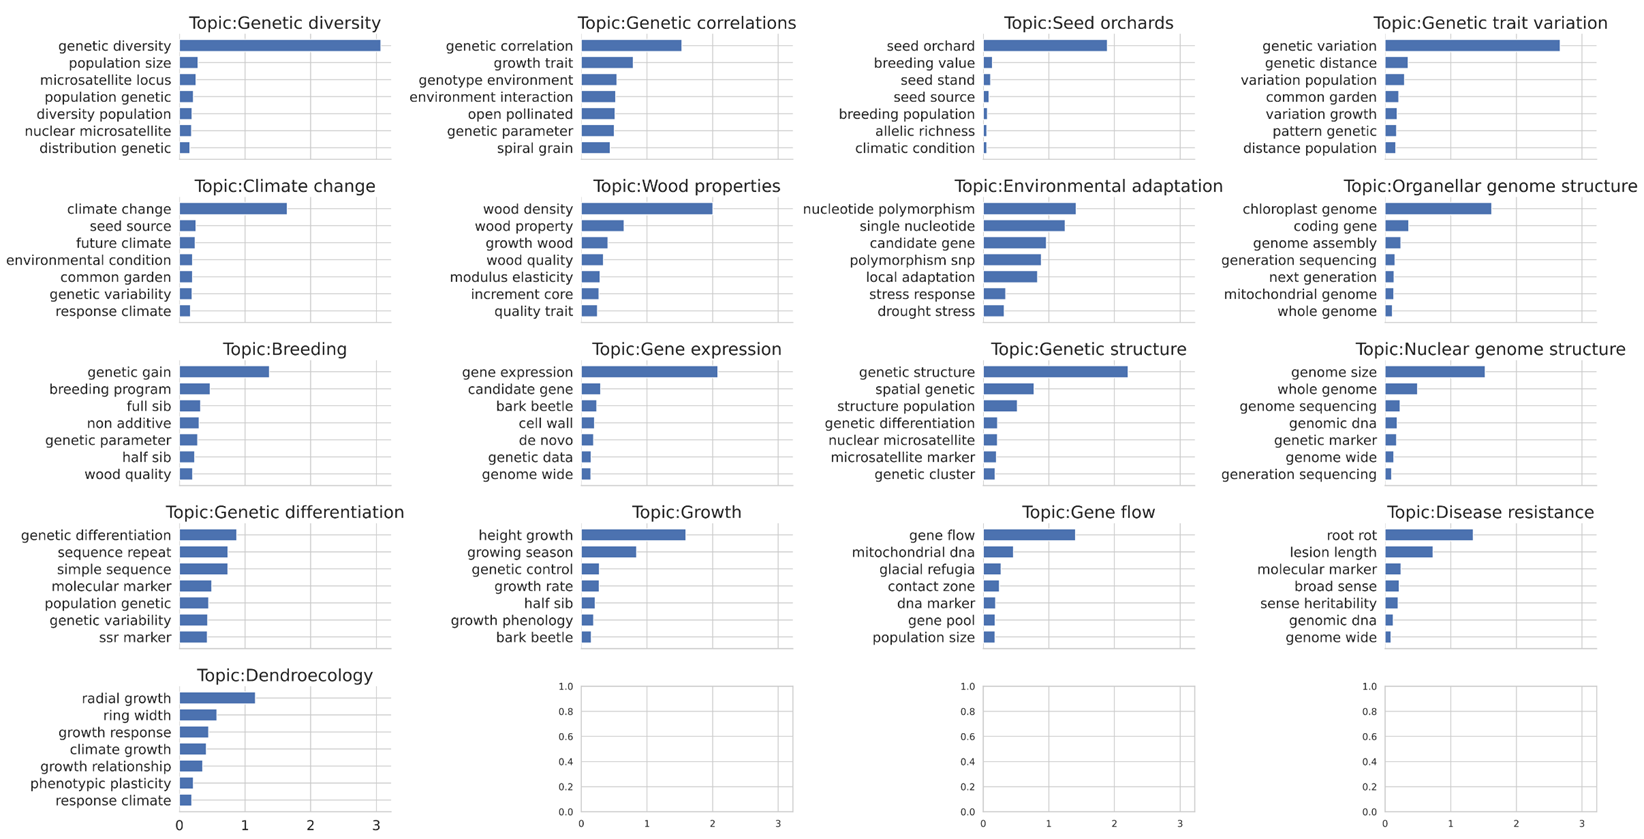


**Figure S 2.3** Topic model with 17 topics identified based on the co-occurrence of pairs of words in abstract and title of 662 publications. The topic titles were assigned by the authors based on the seven word pairs with highest priority in each topic.

**S3 Temporal trends of topics in alpine forest genetics and genomics**


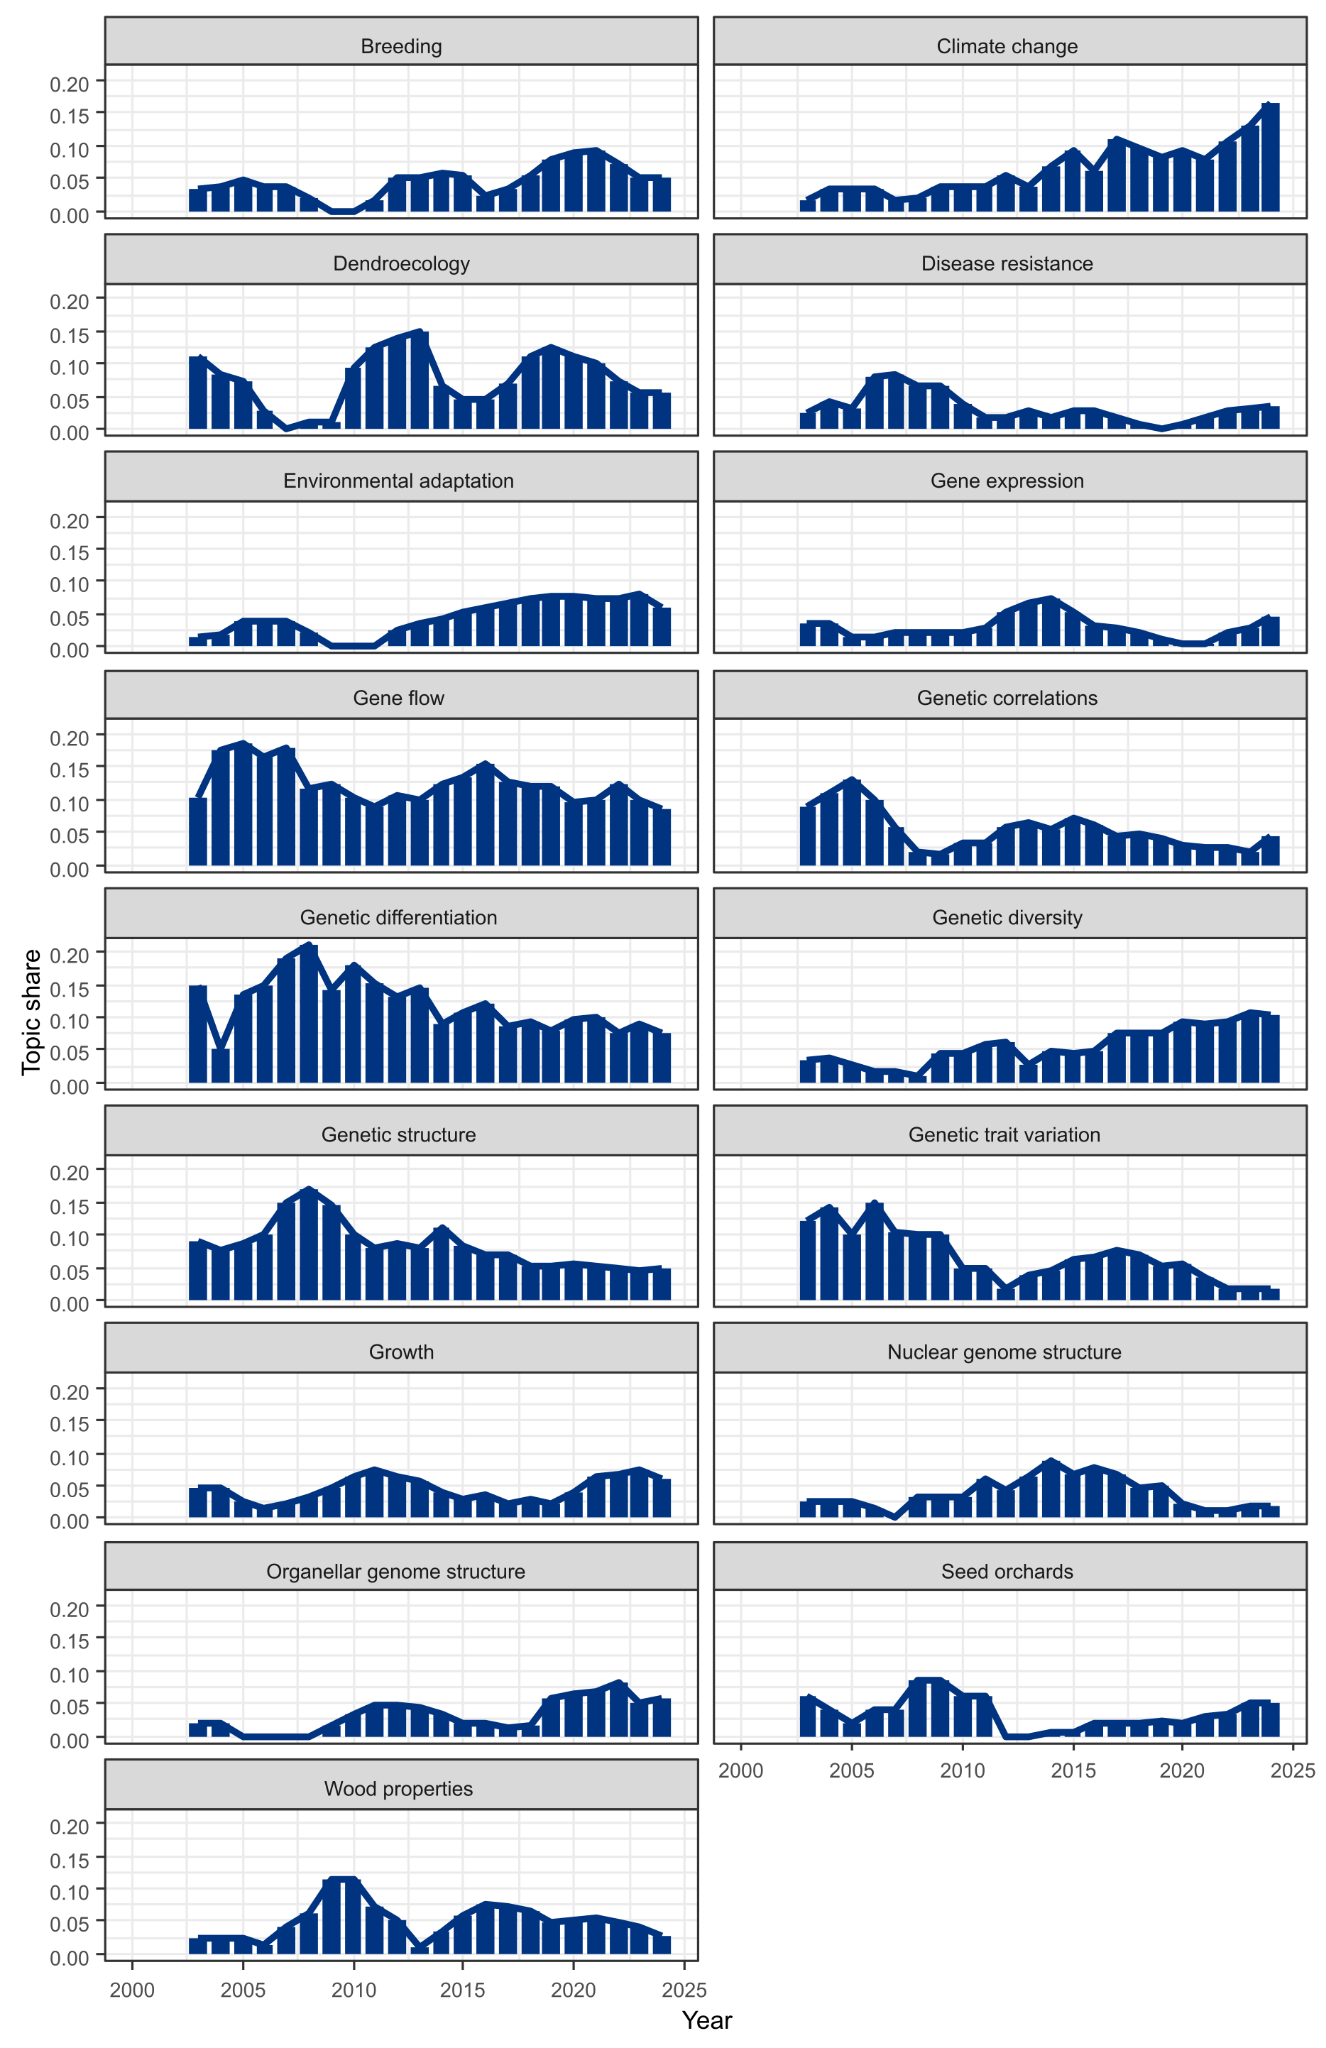


**Figure S3.1** Publication share smoothed over intervals of four years for each of 17 research topics from 2000 to 2024 identified in the 662 publications.


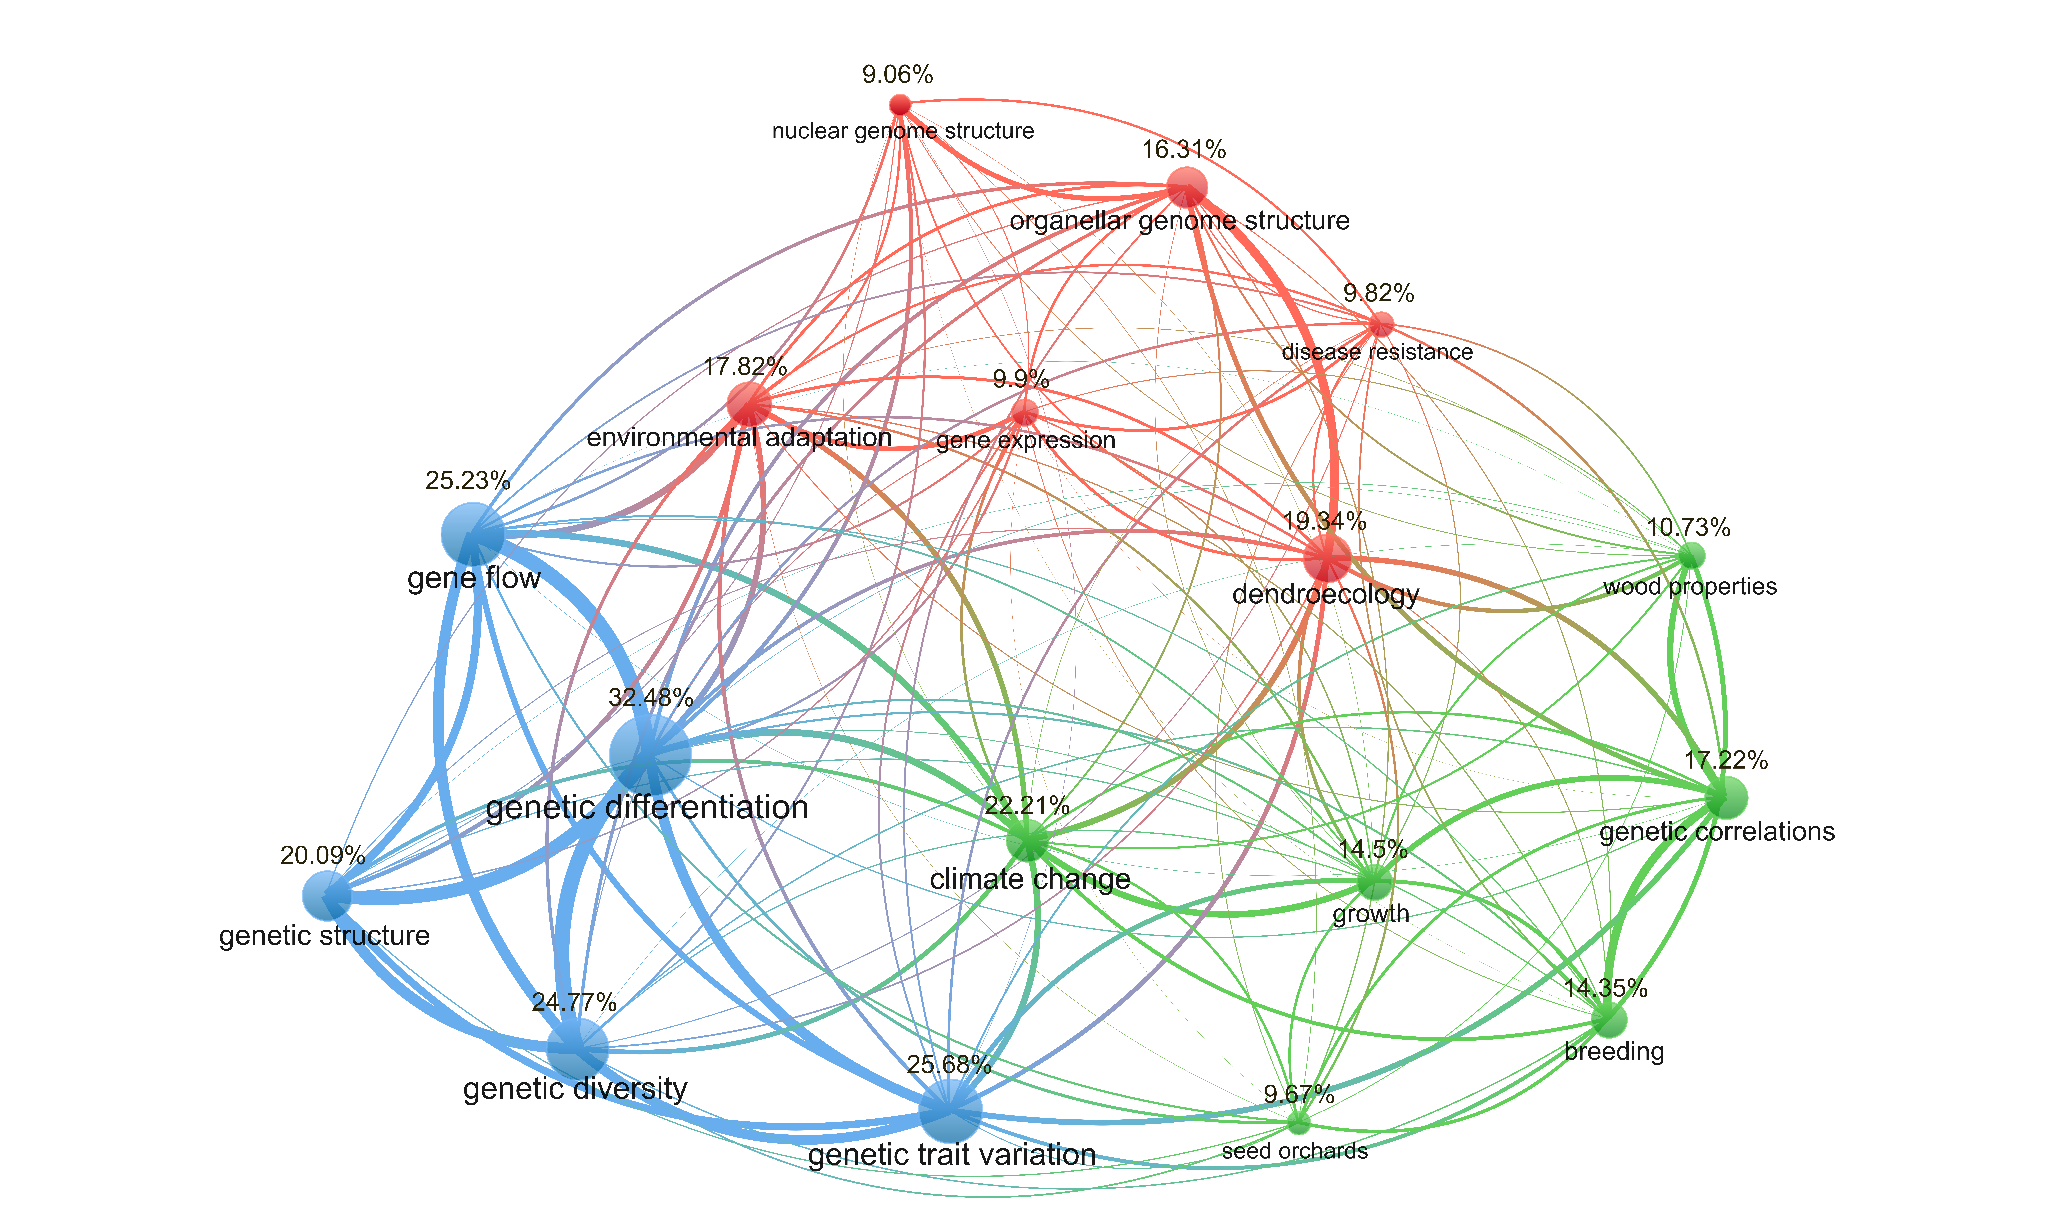


**Figure S3.2** Co-occurrence network of all 17 predefined research topics in alpine forest genomics over the 25-year period (2000–2024). The spatial proximity of items reflects the relative strength of association and thematic similarity between topics. Topics within the same cluster are indicated by matching colors (red: adaptive and quantitative genomics; blue: population structure and genetic diversity; green: functional and trait genomics). Font size and node size correspond to the number of publications in which each topic appears, while connecting lines represent co-occurrence relationships; the thickness of each line denotes the frequency with which two topics co-occur in the same publication. The percentage shown above each node illustrates that topic’s proportion of occurrence across all publications.


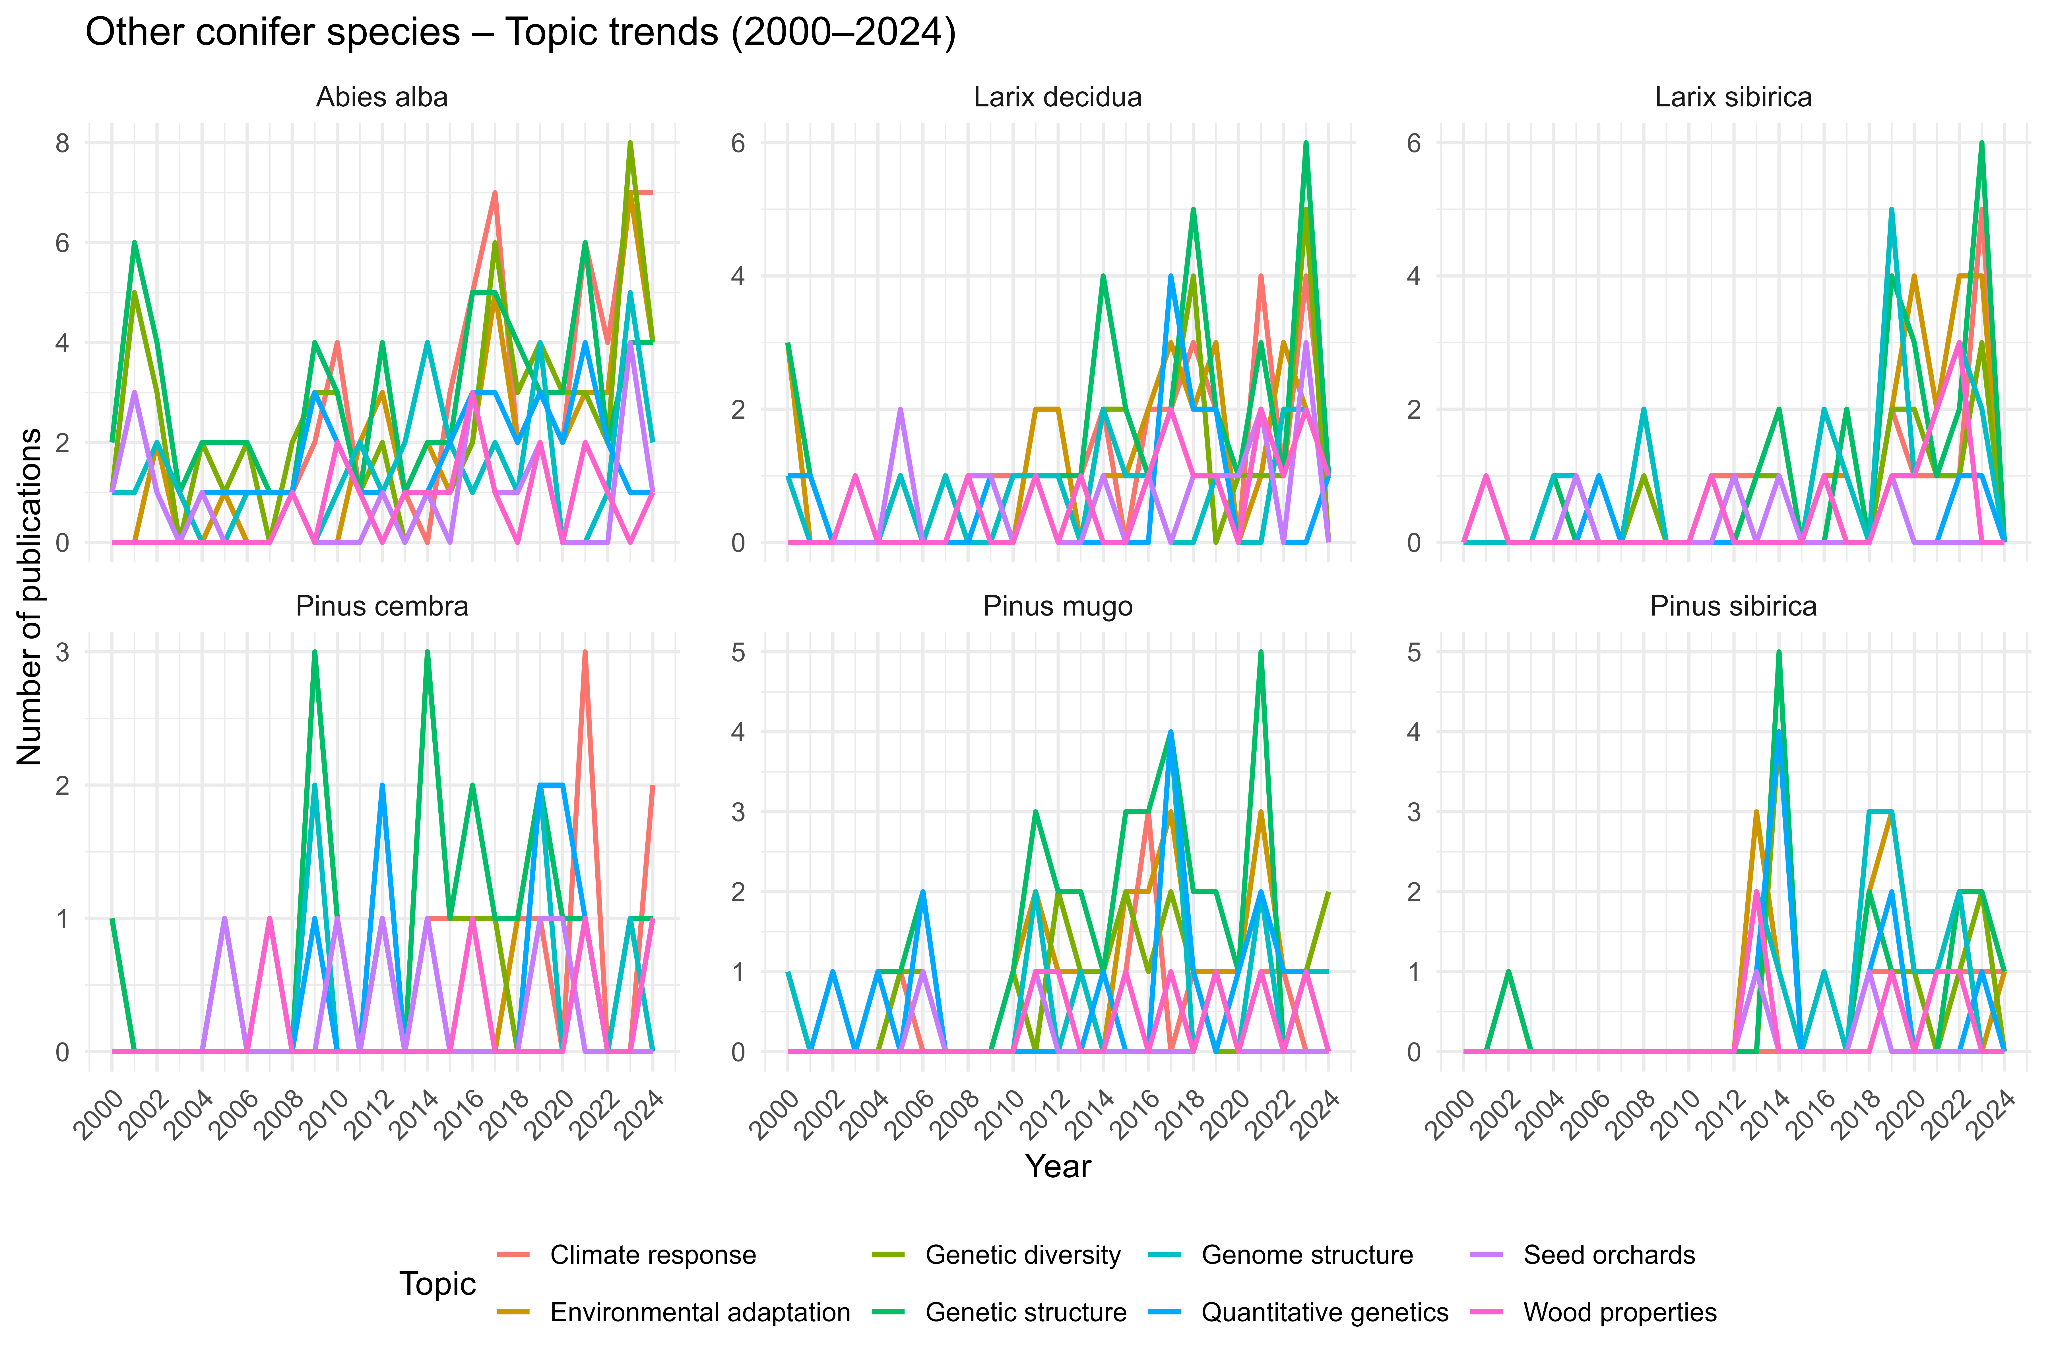


**Figure S3.4.** The topic occurrence trends of the six other conifer species examined, excluding *Picea abies*, for eight predefined research topics in alpine forest genomics over the 2000–2024 period. Each panel represents one of the six tree species in focus, showing the annual number of publications in which the species is associated with each topic. Colours correspond to thematic categories.

# S4 Results of the survey of the AForGeN members


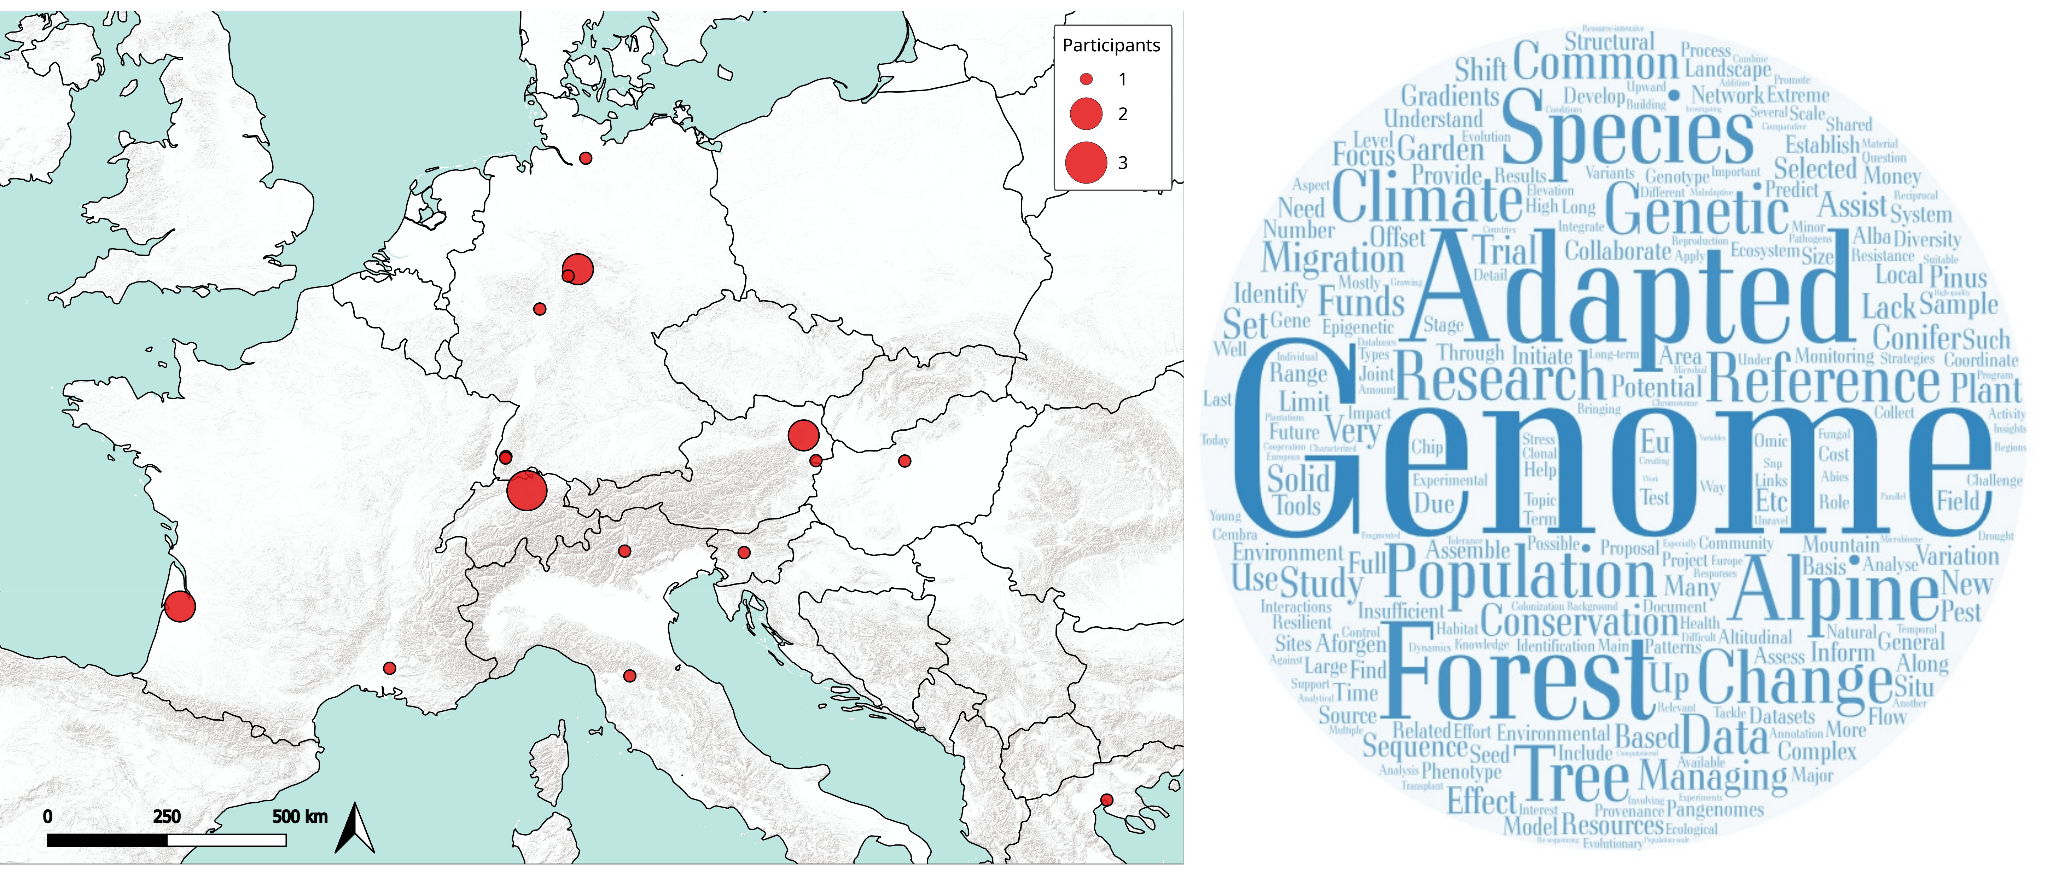


**Figure S4.1.** Overview of the answers given in the member survey: a) Geographic distribution of the participants who answered the survey; b) Word cloud of all answers given in the survey.
