# Supplementary material
Source: Research Square preprint supplement (doi:10.21203/rs.3.rs-9882196/v1)
Supplement: Supplementary file 2 [file 55e476c392eb79d1204cc8dd.xlsx]

## Sheet: ReadMe
Abbreviation	Explanation
PT	Publication Type (\(J\)=Journal, \(B\)=Book, \(S\)=Series, \(P\)=Patent)
AU	Authors (abbreviated first name)
TI	Document Title
SO	Publication Name (Journal/Book title)
DT	Document Type
DE	Author Keywords
AB	Abstract
PY	Publication year
VL	Volume
IS	Issue number
DL	Deposit location
UT	Unique Identifier/Accession Number (unique ID for the record) in Web of Science platform

## Sheet: 662_literature_references
order	PT	AU	TI	SO	DT	DE	AB	PY	VL	IS	DL	UT
1	J	Lewandowski, A; Burczyk, J	Mating system and genetic diversity in natural populations of European larch (<i>Larix decidua</i>) and stone pine (<i>Pinus cembra</i>) located at higher elevations	SILVAE GENETICA	Article	Larix decidua; Pinus cembra; allozymes; outcrossing; mixed-mating model; genetic diversity	Mating system and genetic diversity were investigated in natural populations of European larch (Larix decidua MILL.) and stone pine (Pinus cembra L.) located at the upper Limits of the species ranges in the Italian Alps. Multilocus estimates of outcrossed progeny (t(m)) were relatively low in both populations (t(m) = 0.675 for larch and 0.808 for stone pine), indicating that self-fertilization is…	2000	49	3		WOS:000166087800007
2	J	Burga, CA; Hussendörfer, E	Vegetation history of <i>Abies alba</i> Mill. (silver fir) in Switzerland -: pollen analytical and genetic surveys related to aspects of vegetation history of <i>Picea abies</i> (L.) H. !Karsten (Norway spruce)	VEGETATION HISTORY AND ARCHAEOBOTANY	Article	Abies alba; Picea abies; genetic, pollen and macrofossil studies; Holocene tree re-immigration; Swiss Alps	This contribution deals with some new aspects of the relationship between the vegetation history of Abies alba Mill. (silver fir) and genetic studies of this tree species in Switzerland. The results of the present study confirm the pollen analytical hypothesis that A. alba re-immigrated into Switzerland mainly from glacial refugia located in northern and central Italy. In particular, some distinc…	2001	10	3	http://dx.doi.org/10.1007/PL00006927	WOS:000172555900003
3	J	Mosca, E; Gugerli, F; Eckert, AJ; Neale, DB	Signatures of natural selection on <i>Pinus cembra</i> and <i>P.mugo</i> along elevational gradients in the Alps	TREE GENETICS & GENOMES	Article	Climate change; Elevation; Regional scale; Single nucleotide polymorphisms; Pinus cembra; Pinus mugo	Alpine regions represent an interesting biome for studying local adaptation in forest trees. Strong genetic differentiation is expected along elevational gradients in spite of extensive gene flow. We sampled 18 and 20 natural populations of Pinus cembra and Pinus mugo, in two subregions and four elevational gradients. To investigate the effects of elevation on genetic diversity and adaptation, 76…	2016	12	1	http://dx.doi.org/10.1007/s11295-015-0964-9	WOS:000371329700007
4	J	Kuzmin, DA; Feranchuk, SI; Sharov, VV; Cybin, AN; Makolov, SV; Putintseva, YA; Oreshkova, NV; Krutovsky, KV	Stepwise large genome assembly approach: a case of Siberian larch (<i>Larix sibirica</i> Ledeb)	BMC BIOINFORMATICS	Article; Proceedings Paper	de novo genome assembly; Siberian larch; Larix sibirica	BackgroundDe novo assembling of large genomes, such as in conifers (similar to 12-30 Gbp), which also consist of similar to 80% of repetitive DNA, is a very complex and computationally intense endeavor. One of the main problems in assembling such genomes lays in computing limitations of nucleotide sequence assembly programs (DNA assemblers). As a rule, modern assemblers are usually designed to as…	2019	20		http://dx.doi.org/10.1186/s12859-018-2570-y	WOS:000457693400004
5	J	Bondar, EI; Putintseva, YA; Oreshkova, NV; Krutovsky, KV	Siberian larch (<i>Larix sibirica</i> Ledeb.) chloroplast genome and development of polymorphic chloroplast markers	BMC BIOINFORMATICS	Article; Proceedings Paper	Chloroplast genome; Larix sibirica; Sequencing; Siberian larch; SNPs; SSRs	BackgroundThe main objectives of this study were sequencing, assembling, and annotation of chloroplast genome of one of the main Siberian boreal forest tree conifer species Siberian larch (Larix sibirica Ledeb.) and detection of polymorphic genetic markers - microsatellite loci or simple sequence repeats (SSRs) and single nucleotide polymorphisms (SNPs).ResultsWe used thedata of the whole genome …	2019	20		http://dx.doi.org/10.1186/s12859-018-2571-x	WOS:000457693400005
6	J	Jeandroz, S; Bastien, D; Chandelier, A; Du Jardin, P; Favre, JM	A set of primers for amplification of mitochondrial DNA in <i>Picea abies</i> and other conifer species	MOLECULAR ECOLOGY NOTES	Article	mtDNA; Picea abies; SSCP; PCR-RFLP	Thirteen primer pairs generating intraspecific length and/or presence-absence polymorphism in Picea abies have been obtained from a P. abies mtDNA library, using different methodologies (agarose gel electrophoresis, polymerase chain reaction-restriction fragment length polymorphism (PCR-RFLP), single-strand conformation (SSCP). Polymorphism tests were extended successfully to other Picea species …	2002	2	4	http://dx.doi.org/10.1046/j.1471-8286.2002.00271.x	WOS:000179678400002
8	J	Sikora, J; Celinski, K	Exploring Taxonomic and Genetic Relationships in the <i>Pinus mugo</i> Complex Using Genome Skimming Data	INTERNATIONAL JOURNAL OF MOLECULAR SCIENCES	Article	Pinus mugo complex; genome skimming; nrDNA; mitogenome; plastome; intergenic spacer; next-generation sequencing	Genome skimming is a novel approach that enables obtaining large-scale genomic information based on high-copy DNA fractions from shallow whole-genome sequencing. The simplicity of this method, low analysis costs, and large amounts of generated data have made it widely used in plant research, including species identification, especially in the case of protected or endangered taxa. This task is par…	2024	25	18	http://dx.doi.org/10.3390/ijms251810178	WOS:001326204600001
10	J	Curtu, AL; Sofletea, N; Radu, R; Bacea, A; Abrudan, IV; Butiuc-Keul, A; Farcas, S	Allozyme Variation of Coniferous Tree Species from Maramures Mountains, Romania	NOTULAE BOTANICAE HORTI AGROBOTANICI CLUJ-NAPOCA	Article	Picea abies; Abies alba; allozymes; genetic diversity	Two coniferous tree species, Norway spruce [Picea abies L. (Karst)] and silver fir (Abies alba Mill.), from Maramures Mountains Nature Park, in northern Romania, were examined by means off allozyme markers. For Norway spruce, the genetic structure was observed at 19 enzyme coding loci in two populations situated at different elevations above the see level. Moderate levels of genetic variation wit…	2009	37	2		WOS:000272606600042
11	J	Mosca, E; Eckert, AJ; Di Pierro, EA; Rocchini, D; La Porta, N; Belletti, P; Neale, DB	The geographical and environmental determinants of genetic diversity for four alpine conifers of the European Alps	MOLECULAR ECOLOGY	Article	Abies; landscape genetics; Larix; Pinus; population structure; single nucleotide polymorphisms	Climate is one of the most important drivers of local adaptation in forest tree species. Standing levels of genetic diversity and structure within and among natural populations of forest trees are determined by the interplay between climatic heterogeneity and the balance between selection and gene flow. To investigate this interplay, single nucleotide polymorphisms (SNPs) were genotyped in 24 to …	2012	21	22	http://dx.doi.org/10.1111/mec.12043	WOS:000310583800014
12	J	Geburek, T; Robitschek, K; Milasowszky, N; Schadauer, K	Different cone colours pay off:: lessons learnt from European larch (<i>Larix decidua</i>) and Norway spruce (<i>Picea abies</i>)	CANADIAN JOURNAL OF BOTANY-REVUE CANADIENNE DE BOTANIQUE	Article	adaptive colouration; altitude-temperature gradient; cone polymorphism; spatial autocorrelation	The colour morphs of immature female cones in European larch (Larix decidua Mill.) and Norway spruce (Picea abies (L.) Karst.) are green, red, and intermediate in colour. For the first time, these three colour morphs were studied to verify the thermoregulatory hypothesis and to investigate its underlying genetic spatial pattern. The study was based on an extensive systematic sampling, and data we…	2007	85	2	http://dx.doi.org/10.1139/B07-003	WOS:000247094000002
13	J	Schott, T; Schroeder, H; Schöning-Stierand, K; Kersten, B	The complete chloroplast genome sequence of <i>Pinus cembra</i> L. (Pinaceae)	MITOCHONDRIAL DNA PART B-RESOURCES	Article	Chloroplast genome; genome assembly; Pinaceae	The Swiss pine (Pinus cembra) is a montane tree in Central Europe and, therefore, known for its hardiness against severe winter colds. The seeds are harvested and eaten as pine nuts. We assembled and characterized the complete chloroplast genome of P. cembra to serve as a valuable resource in future genetic studies. The complete plastome sequence is 116,609 bp in length and contains 113 genes inc…	2019	4	2	http://dx.doi.org/10.1080/23802359.2019.1693297	WOS:000499166300001
14	J	Celinski, K; Chudzinska, E; Gmur, A; Piosik, L; Wojnicka-Póltorak, A	Cytological characterization of three closely related pines - Pinus mugo, P. uliginosa and P. x rhaetica from the Pinus mugo complex (Pinaceae)	BIOLOGIA	Article	Karyotypes; C-banding patterns; Flow cytometry; DNA content; The Pinus mugo complex; Pinus uliginosa; Pinus x rhaetica	The Pinus mugo complex comprises closely related pines in different taxonomic ranks, which commonly occur in major European mountain chains. This large and polymorphic complex has been, and still is, a considerable challenge for taxonomists due to highly variable phenotypical characteristics within particular taxa, ongoing hybridization in sympatric populations, lack of distinct morphological spe…	2019	74	7	http://dx.doi.org/10.2478/s11756-019-00201-6	WOS:000471601600002
15	J	Muratova, EN; Goryachkina, OV; Karpjuk, TV	Karyological analysis of Larch<i> (Larix sibirica</i> Ledeb.) from Mongolia	INDIAN JOURNAL OF GENETICS AND PLANT BREEDING	Article	Larix sibirica; conifers; karyotype; chromosomes; secondary constrictions; nucleoli; genome; chromosome mutations	This paper deals with the karyotype study on Larix sibirica from Mongolia. Diploid chromosome number was established (2n = 24). Karyotype included 6 pairs (I-VI) of metacentric chromosomes and 6 pairs (VII-XII) of sub-metacentric chromosomes. Secondary constrictions were observed in eight chromosomes; interphase nuclei included from 1 to 8 nucleoli. Mean size of chromosomes of the first group is …	2022	82	4	http://dx.doi.org/10.31742/ISGPB.82.4.15	WOS:001062832500015
17	J	Baturina, OA; Tupikin, AE; Goroshkevich, SN; Petrova, EA; Kabilov, MR	The complete chloroplast genome sequences of <i>Pinus sibirica</i> Du Tour	MITOCHONDRIAL DNA PART B-RESOURCES	Article	Chloroplast genome; Pinus sibirica; taiga	The complete nucleotide sequence of Pinus sibirica Du Tour chloroplast genome (cp DNA) was determined in this study. The cpDNA was 116,635 bp in length, containing a pair of 473 bp inverted repeat (IR) regions (IRa and IRb), which were separated by large and small single-copy regions (LSC and SSC) of 63,908 and 51,781 bp, respectively. The cpDNA contained 113 genes, including 81 protein-coding ge…	2019	4	1	http://dx.doi.org/10.1080/23802359.2018.1542983	WOS:000454194700001
18	J	Chertov, N; Vasilyeva, Y; Zhulanov, A; Nechaeva, Y; Boronnikova, S; Kalendar, R	Genetic Structure and Geographical Differentiation of <i>Larix sibirica</i> Ledeb. in the Urals	FORESTS	Article	simple sequence repeats (SSR); multiplex PCR; genetic diversity; population structure; genetic differentiation; Larix sibirica Ledeb	The Ural Mountains and the West Eurasian Taiga forests are one of the most important centers of genetic diversity for Larix sibirica Ledeb. Forest fragmentation negatively impacts forest ecosystems, especially due to the impact of their intensive use on the effects of climate change. For the preservation and rational use of forest genetic resources, it is necessary to carefully investigate the ge…	2021	12	10	http://dx.doi.org/10.3390/f12101401	WOS:000715090500001
19	J	Höhn, M; Hufnagel, L; Cseke, K; Vendramin, GG	CURRENT RANGE CHARACTERISTICS OF SWISS STONE PINE (<i>PINUS CEMBRA</i> L.) ALONG THE CARPATHIANS REVEALED BY CHLOROPLAST SSR MARKERS	ACTA BIOLOGICA HUNGARICA	Article	Carpathians; chloroplast microsatellites; colonization route; Pinus cembra	We investigated the diversity pattern of nine Swiss stone pine (Pinus cembra L.) populations along the Carpathian range including the High Tatras, by using six chloroplast DNA microsatellites (cpSSR). Our aim was to detect genetically distinct regions by clustering of populations, and to tackle possible historical colonization routes. Our analysis referred to an investigated geographical range wi…	2010	61		http://dx.doi.org/10.1556/ABiol.61.2010.Suppl.7	WOS:000290954500007
20	J	Monteleone, I; Ferrazzini, D; Belletti, P	Effectiveness of neutral RAPD markers to detect genetic divergence between the subspecies <i>uncinata</i> and <i>mugo</i> of <i>Pinus mugo</i> Turra	SILVA FENNICA	Article	Pinus mugo; mountain pine; dwarf mountain pine; molecular markers; genetic diversity; population differentiation	Fifteen populations of Pinus mugo subsp. mugo (shrub) and Pinus mugo subsp. uncinata (erect), located in the Alps, were investigated through genetic variation scored at 64 polymorphic RAPD loci. In addition, morphological traits of the female cones were analysed. According to AMOVA most of the genetic variation was found within populations (83.39%), and only 1.25% of it between subspecies. Popula…	2006	40	3	http://dx.doi.org/10.14214/sf.476	WOS:000240672300001
21	J	Venäläinen, M; Harju, AM; Nikkanen, T; Paajanen, L; Velling, P; Viitanen, H	Genetic variation in the decay resistance of Siberian larch (<i>Larix sibirica</i> Ledeb.) wood	HOLZFORSCHUNG	Article	Larix sibirica; Coniophora puteana; heartwood; wood decay resistance; clonal repeatability; heritability	The aim of the study was to estimate the degree of genetic determination in the decay resistance of Siberian larch (Larix sibirica Ledeb.) wood and its correlation to other wood traits. The wood samples were taken from 25-year-old grafted seed orchard clones with an increment core borer, dried, weighed, and subjected to a laboratory decay test using a modified method based on the standardised EN …	2001	55	1	http://dx.doi.org/10.1515/HF.2001.001	WOS:000166896600001
22	J	Vasilyeva, GV; Goroshkevich, SN	Crossability of <i>Pinus sibirica</i> and <i>P.pumila</i> with their hybrids	SILVAE GENETICA	Article	hybridization; Pinus sibirica; P. pumila; controlled pollination; reproductive isolation	Crossability of Pinus sibirica and P. pumila hybrids and their parental species was studied using the controlled pollination method. Pinus sibirica and its hybrids were represented by grafts at the "Kedr" field station southeast of Tomsk Oblast, Russia; the parental species was of local provenance, with its hybrids obtained from the Southern Baikal region. In the case of P pumila, trees were poll…	2013	62	45689	http://dx.doi.org/10.1515/sg-2013-0008	WOS:000323240000008
23	J	Celinski, K; Zbránková, V; Wojnicka-Póltorak, A; Chudziñska, E	Biogeography and evolutionary factors determine genetic differentiation of <i>Pinus mugo</i> (Turra) in the Tatra Mountains (Central Europe)	JOURNAL OF MOUNTAIN SCIENCE	Article	Biogeography; Conservation genetics; The Tatra Mountains; Pinus mugo	Inter Simple Sequence Repeats (ISSR) markers were used to assess genetic diversity within and among populations of dwarf mountain pine (Pinus mugo Turra) growing in the Tatra National Park (UNESCO Biosphere Reserve) in Southern Poland (Central Europe). The analyzed population belongs to two different geobotanical sub-districts: the Western and High Tatras. The level of genetic diversity assessed …	2015	12	3	http://dx.doi.org/10.1007/s11629-014-3028-y	WOS:000355429000002
24	J	Li, GY; Wu, WJ; Zhang, YX; Mao, JH; Song, YJ; Han, XY; Song, MH; Guo, ZN; Dong, YB; Liu, XM	Next-generation sequencing yields the complete chloroplast genome of <i>Abies Alba</i>	MITOCHONDRIAL DNA PART B-RESOURCES	Article	Abies alba; chloroplast genome; phylogenetic	Abies alba is native to the mountains of Europe and often used as Christmas trees. In this study, we reported the complete chloroplast genome of A. alba. The complete chloroplast genome is 121,243 bp in length, comprising a large single copy (LSC) region of 67,034 bp, a small single copy (SSC) region of 53,681 bp, and two inverted repeat regions (IRa and IRb) of 264 bp each. The genome contains 1…	2019	4	1	http://dx.doi.org/10.1080/23802359.2018.1558122	WOS:000456016600001
25	J	Zhao, GF; Felber, F; Küpfer, P	Genetic variation and differentiation of <i>Larix decidua</i> populations in Swiss Alps	ACTA BOTANICA SINICA	Article	Larix decidua; Swiss Alps; allozyme variation; genetic differentiation; age classes	Genetic diversity within and among six subpopulations of Larix decidua Mill. from two altitudinal transects of Swiss Alps was investigated using 6 enzyme systems coding for 8 loci. Globally, the mean proportion of polymorphic loci was 22.9%, the average number of alleles per locus was 1.3, and the mean expected heterozygosity was 0.095. Only 5.8% of the genetic variation resided among populations…	2001	43	7		WOS:000170245200012
26	J	Mosca, E; Di Pierro, EA; Budde, KB; Neale, DB; González-Martínez, SC	Environmental effects on fine-scale spatial genetic structure in four Alpine keystone forest tree species	MOLECULAR ECOLOGY	Article	Alpine plants; climate; environmental change; fine-scale spatial genetic structure; single nucleotide polymorphisms	Genetic responses to environmental changes take place at different spatial scales. While the effect of environment on the distribution of species' genetic diversity at large geographical scales has been the focus of several recent studies, its potential effects on genetic structure at local scales are understudied. Environmental effects on fine-scale spatial genetic structure (FSGS) were investig…	2018	27	3	http://dx.doi.org/10.1111/mec.14469	WOS:000428453500005
28	J	Lewandowski, A; Filipiak, I; Burczyk, J	Genetic variation of <i>Abies alba</i> Mill. in Polish part of Sudety Mts.	ACTA SOCIETATIS BOTANICORUM POLONIAE	Article	Abies alba; allozymes; genetic diversity; differentiation	The genetic structure of silver fir (Abies alba Mill.) was investigated among 8 populations from Sudety Mts. and 2 additional populations from other parts of Poland. Nine enzyme systems controlled by 13 allozyme loci were analyzed using starch gel electrophoresis. The mean expected heterozygosity, ranging from 0.06 to 0.11 and was lower compared to that found in other conifers. The mean genetic d…	2001	70	3		WOS:000171549100008
30	J	Novikova, SV; Oreshkova, NV; Sharov, VV; Semerikov, VL; Krutovsky, KV	Genetic Structure and Geographical Differentiation of Siberian Larch (<i>Larix sibirica</i> Ledeb.) Populations Based on Genome Genotyping by Sequencing	CONTEMPORARY PROBLEMS OF ECOLOGY	Article	population; genetic structure; Larix sibirica; adaptation; climatic variables; conifers; ddRADseq; SNP	The genetic differentiation of Siberian larch (Larix sibirica Ledeb.) populations along the latitudinal gradient of climatic conditions was studied using high-throughput double digest restriction-site associated DNA sequencing (ddRADseq) data. We studied correlation of five main climatic variables with variation of 47.929 single nucleotide polymorphisms (SNPs). In total, 125 trees were genotyped …	2023	16	5	http://dx.doi.org/10.1134/S1995425523050086	WOS:001080683600009
31	J	Popovic, V; Lucic, A; Rakonjac, L; Cvjetkovic, B; Drinic, SM; Ristic, D	ASSESSMENT OF GENETIC DIVERSITY OF SILVER FIR (<i>Abies alba</i> Mill.) IN SERBIA USING SSR MARKERS	GENETIKA-BELGRADE	Article	Abies alba Mill.; SSR markers; population; variability	The paper presents the results of the analysis of genetic variability of eight populations of silver fir (Abies alba Mill.) in Serbia obtained using SSR markers. The genomic DNA was isolated from tissue of needles of all eight populations. Due to the costly and lengthy process a small number of the SSR markers for Abies alba have been developed, so in this study were used the microsatellite marke…	2017	49	3	http://dx.doi.org/10.2298/GENSR1703979P	WOS:000423604800018
32	J	Prus-Glowacki, W; Baczkiewicz, A; Wysocka, D	Clonal structure of small isolated populations of <i>Pinus mugo</i> Turra from peatbogs in the Tatra Mts	ACTA BIOLOGICA CRACOVIENSIA SERIES BOTANICA	Article	Pinus mugo Turra; genetic variability; isozymes; clones; isolated populations; gene flow	This study examined genetic variability at 11 allozyme loci and the clonal structure of peatbog populations of dwarf mountain pine (Pinus mugo Turra) from three small isolated stands in the Tatra Mts, Poland. The percentage of clones in the peatbog populations was high, 48.45% on average. Genetic variability was lower in these populations than in populations from the continuous range of the speci…	2005	47	2		WOS:000234723000007
33	J	Mader, M; Blanc-Jolivet, C; Kersten, B; Liesebach, H; Degen, B	A novel and diverse set of SNP markers for rangewide genetic studies in <i>Picea abies</i>	CONSERVATION GENETICS RESOURCES	Article	Picea abies; Single nucleotide polymorphism; Targeted genotyping by sequencing; Geographic origin	We used Double Digest Restriction site associated DNA sequencing (ddRADseq), exome sequencing (exome-seq) and targeted genotyping by sequencing (GBS) to develop new geographically informative nuclear SNP markers in Picea abies. This set of 518 loci consists of 397 loci specifically designed for the geographic differentiation of populations and 121 loci of adaptive markers for drought stress which…	2022	14	3	http://dx.doi.org/10.1007/s12686-022-01276-1	WOS:000802920300001
34	J	Zhao, XY; Wang, C; Li, SC; Hou, W; Zhang, SQ; Han, GJ; Pan, D; Wang, P; Cheng, YF; Liu, GF	Genetic variation and selection of introduced provenances of Siberian Pine (<i>Pinus sibirica</i>) in frigid regions of the Greater Xing'an Range, Northeast China	JOURNAL OF FORESTRY RESEARCH	Article	Pinus sibirica; provenance; generic testing; variation; selection	Siberian Pine (Pinus sibirica) is an ecologically and economically important species in pristine forests throughout northern Russia. Four provenances of P. sibirica were introduced from Mongolia and Russia to the Greater Xing'an Range (the Daxing'anling), northeast China in 1993. The aim of this research was to study genetic variation and selection of the introduced four Pinus sibirica provenance…	2014	25	3	http://dx.doi.org/10.1007/s11676-014-0494-6	WOS:000339231100007
36	J	Oreshkova, NV; Sedel'nikova, TS; Pimenov, AV	Genetic Diversity of Coenopopulations of <i>Larix sibirica</i> Ledeb. and <i>Picea obovata</i> Ledeb. in Taimyr	CONTEMPORARY PROBLEMS OF ECOLOGY	Article	Larix sibirica; Picea obovata; microsatellites; genetic diversity; heterozygosity; Taimyr	The DNA polymorphism of cenopopulations Larix sibirica Ledeb. and Picea obovate Ledeb. growing in different ecological conditions of the southern part of the Taimyr Peninsula has been studied and their genetic diversity in nuclear microsatellite loci is estimated: N-A = 3.30, N-E = 1.75, H-O = 0.263, and H-E = 0.366 in L. sibirica and N-A = 2.92, N-E = 1.59, H-O = 0.351, H-E = 0.338 in P. obovata…	2023	16	5	http://dx.doi.org/10.1134/S1995425523050098	WOS:001080683600007
37	J	Kupferschmid, AD; Heiri, C	Recovery of <i>Abies alba</i> and <i>Picea abies</i> saplings to browsing and frost damage depends on seed source	ECOLOGY AND EVOLUTION	Article	climate change; common garden; evolutionary adaptation; herbivory; provenance test; tree regeneration; ungulate browsing	The density of wild ungulates has increased in the last century, and browsing has become a major driver of forest succession in the northern hemisphere. In addition, tree species are expected to respond differently to future climate conditions, especially an increased frequency of late frost events. The aim of this study was to analyze the influence of intraspecific genetic variation on the recov…	2019	9	6	http://dx.doi.org/10.1002/ece3.4955	WOS:000462384800019
38	J	Radu, RG; Curtu, AL; Sparchez, G; Sofletea, N	Genetic diversity of Norway spruce [<i>Picea abies</i> (L.) Karst.] in Romanian Carpathians	ANNALS OF FOREST RESEARCH	Article	genetic diversity; Norway spruce; Picea abies; conservation; allozymes; Romanian Carpathians	The genetic diversity of Romanian most important coniferous tree species, the Norway spruce, was estimated by means of allozyme markers. A total of 695 adult trees sampled from eleven populations grouped in six mountainous areas in the Romanian Carpathians were analyzed. In three metapopulations (Maramures, Postavar and Parang), to evaluate the influence of altitudinal gradient on genetic diversi…	2014	57	1		WOS:000340352300003
39	J	Mitic, ZS; Nikolic, JS; Zlatkovic, BK; Milanovici, SJ; Jovanovic, SC; Nikolic, BM; Stojanovic, GS; Marin, PD	Epicuticular Waxes Provide Insights into Phytochemical Differentiation of Natural Populations of <i>Pinus mugo</i> Turra sensu stricto	CHEMISTRY & BIODIVERSITY	Article	Pinus mugo; diterpenes; primary alcohols; alkanes; molecular diversity; phytochemistry	Phytochemical diversity and differentiation of nine native populations of Pinus mugo sensu stricto from Julian Alps, Southern Carpathians and Balkan Peninsula were analyzed in regard to their epicuticular wax compounds. GC/MS and GC-FID analyses of the hexane extracts of needle samples, collected from 118 individuals of P. mugo, revealed the presence of six diterpenes, three primary alcohols and …	2018	15	12	http://dx.doi.org/10.1002/cbdv.201800378	WOS:000453730600006
40	J	Heuertz, M; Teufel, J; González-Martínez, SC; Soto, A; Fady, B; Alía, R; Vendramin, GG	Geography determines genetic relationships between species of mountain pine (<i>Pinus mugo</i> complex) in western Europe	JOURNAL OF BIOGEOGRAPHY	Review	Chloroplast microsatellites; conservation; genetic clusters; haplotype sharing; historical demography; hybridization; Pinus mugo complex; Pinus sylvestris; post-glacial recolonization; western Europe	Aim Our aims were to test whether morphological species of mountain pines were genetically supported in the western part of the distribution range of the Pinus mugo species complex (Pinus mugo Turra sensu lato), to resolve genetically homogeneous clusters of populations, to determine historical demographic processes, and to assess the potential hybridization of mountain pines with Scots pine, Pin…	2010	37	3	http://dx.doi.org/10.1111/j.1365-2699.2009.02223.x	WOS:000273949700015
41	J	Hedman, H; Zhu, TQ; von Arnold, S; Sohlberg, JJ	Analysis of the <i>WUSCHEL-RELATED HOMEOBOX</i> gene family in the conifer <i>picea abies</i> reveals extensive conservation as well as dynamic patterns	BMC PLANT BIOLOGY	Article	Picea abies; Somatic embryogenesis; WOX genes	Background: Members of the WUSCHEL-RELATED HOMEOBOX (WOX) gene family have important functions during all stages of plant development and have been implicated in the development of morphological novelties during evolution. Most studies have examined the function of these genes in angiosperms and very little is known from other plant species. Results: In this study we examine the presence and expr…	2013	13		http://dx.doi.org/10.1186/1471-2229-13-89	WOS:000321302100001
42	J	Wagner, S; Gerber, S; Petit, RJ	Two highly informative dinucleotide SSR multiplexes for the conifer Larix decidua (European larch)	MOLECULAR ECOLOGY RESOURCES	Article	large genome size; Larix decidua; microsatellite; next-generation sequencing; polymorphism	We have designed two highly polymorphic microsatellite multiplexes for Larix decidua Mill (European larch), a coniferous tree species with a fragmented distribution across Europe. The multiplexes combine microsatellites previously designed for the sister species L. kaempferi and newly identified microsatellites obtained by pyrosequencing of an enriched microsatellite library and subsequent marker…	2012	12	4	http://dx.doi.org/10.1111/j.1755-0998.2012.03139.x	WOS:000305070300017
43	J	Vasilyeva, YS; Zhulanov, AA; Boronnikova, SV; Yanbaev, YA	Genetic structure of ural populations of <i>Larix</i> <i>sibirica</i> Ledeb. on the base of analysis of nucleotide polymorphism	SILVAE GENETICA	Article	Larix sibirica Ledeb.; Urals; genetic structure; gene pool; populations; nucletide polymorphism	Research on the state and dynamics of the gene pool (an important natural resource that determines the potential fitness of living organisms and, ultimately, their long-term survival) becomes an important problem in the context of increased anthropogenic environmental impact. They are especially important for key species of ecosystems of a global scale importance. Larix sibirica Ledeb., which spr…	2020	69	1	http://dx.doi.org/10.2478/sg-2020-0004	WOS:000524731000001
44	J	Köbölkuti, ZA; Tóth, EG; Jahn, D; Heinze, B; Höhn, M	SNP marker development in <i>Pinus sylvestris</i> L. in stress-responsive genes characterized from <i>Pinus cembra</i> L. transcriptomes	MOLECULAR BIOLOGY REPORTS	Article	Pinus cembra; Pinus sylvestris; Adaptation; Candidate genes; SNP markers	Massively parallel sequencing of cDNA is an efficient route for generating sequence collections that represent expressed genes under different environmental control. The analysis of their sequence helps in developing molecular markers, such as SNPs, which represent a useful tool in detecting adaptive signals in populations. In this study novel PCR markers, based on stress responsive genes, were d…	2020	47	6	http://dx.doi.org/10.1007/s11033-020-05527-y	WOS:000534198100003
45	J	Shuvaev, DN; Semerikov, VL; Kuznetsova, GV; Putintseva, YA	Late Quaternary history of Siberian stone pine as revealed by genetic and paleoecological data	TREE GENETICS & GENOMES	Article	Pinus sibirica; Genetic markers; Paleorecord; Species distribution modeling; Late Quaternary; Refugia	Current climatic trends raise concerns about the fate of boreal forests and associated communities. To understand forest vegetation dynamics in the face of future changes, it is necessary to know how trees have responded to past climatic fluctuations. We investigated genetic data and a past distribution based on paleorecords and species distribution modeling data to determine refugia and migratio…	2023	19	2	http://dx.doi.org/10.1007/s11295-023-01592-z	WOS:000945401200001
46	J	Celinski, K; Pawlaczyk, EM; Wojnicka-Poltorak, A; Chudzinska, E; Prus-Glowacki, W	Cross-species amplification and characterization of microsatellite loci in <i>Pinus mugo</i> Turra	BIOLOGIA	Article	dwarf mountain pine; conservation genetics; genetic diversity; microsatellite transfer; SSR	Pinus mugo (dwarf mountain pine) is an important component of European mountain ecosystems. However, little is known about the present genetic structure and population differentiation of this species at the DNA level, possibly due to a lack of nuclear microsatellite markers (SSR) developed for Pinus mugo. Therefore in this study we transferred microsatellite markers originally developed for Pinus…	2013	68	4	http://dx.doi.org/10.2478/s11756-013-0189-z	WOS:000320373500008
47	J	Celinski, K; Kijak, H; Wojnicka-Póltorak, A; Buczkowska-Chmielewska, K; Sokolowska, J; Chudzinska, E	Effectiveness of the DNA barcoding approach for closely related conifers discrimination: A case study of the <i>Pinus mugo</i> complex	COMPTES RENDUS BIOLOGIES	Article	The Pinus mugo complex; Chloroplast DNA; Barcoding; Taxonomy; Species identification	DNA barcoding is a standard and efficient method, frequently used for identification, discrimination and discovery of new species. Although this approach is very useful for classifying the world's biodiversity, little is known about its usefulness in barcoding at lower taxonomic level and its discrimination rate for closely related species, like conifers. In this study, we compared the genetic va…	2017	340	45844	http://dx.doi.org/10.1016/j.crvi.2017.06.002	WOS:000406940100005
49	J	Wojnicka-Póltorak, A; Celinski, K; Chudzinska, E; Prus-Glowacki, W; Korczyk, AE	Genetic profile of the oldest <i>Picea abies</i> (L.) Karst. trees in the Bialowieza Primeval Forest	SYLWAN	Article	genetic structure; Picea abies; isoenzymatic markers; Bialowieza Primeval Forest	The aim of this study was to: 1) describe the genetic structure of the population of old Picea-abies trees in the Bialowieza Primeval Forest and 2) design the genetic database for every examined tree in scope of 26 isoenzymatic loci containing: the genotype pattern, the number of stated alleles and the level of individual heterozygosity. We found that 101 out of 117 trees are characterized by a u…	2014	158	5		WOS:000338407600006
50	J	Bastien, D; Favre, JM; Collignon, AM; Sperisen, C; Jeandroz, S	Characterization of a mosaic minisatellite locus in the mitochondrial DNA of Norway spruce [<i>Picea abies</i> (L.) Karst.]	THEORETICAL AND APPLIED GENETICS	Article	minisatellite; VNTR; mtDNA; heteroplasmy; Picea abies	A mosaic minisatellite region has been identified in the mitochondrial genome of Norway spruce (Picea abies). The array was composed of three tandem repeats PaTR1 (32 bp), PaTR2a (26 bp) and PaTR2b (26 bp). PaTR2a and PaTR2b differed by one base substitution. The analysis of 92 trees covering the whole natural distribution area of the species allowed detection of 11 length variants ranging from 1…	2003	107	3	http://dx.doi.org/10.1007/s00122-003-1284-2	WOS:000185004200023
51	J	Sannikov, SN; Petrova, IV; Schweingruber, F; Egorov, EV; Parpan, TV	Genetic differentiation of Pinus mugo Turra and P. sylvestris L. populations in the Ukrainian Carpathians and the Swiss Alps	RUSSIAN JOURNAL OF ECOLOGY	Article	Pinus sylvestris; Pinus mugo; Ukrainian Carpathians; Swiss Alps; population; subspecies; allozyme analysis; polymorphism; genetic differentiation	The allozyme analysis of six local populations of Pinus mugo Turra and six populations of P. sylvestris L. in the Ukrainian Carpathians, Swiss Alps, and Schwarzwald has shown a higher polymorphism and greater interpopulation differentiation of the Carpathian group of P. mugo populations compared to the Alpine group (Nei's genetic distance DN (78) at the level of geographic population group is -0.…	2011	42	4	http://dx.doi.org/10.1134/S1067413611040151	WOS:000292461900002
52	J	Oreshkova, NV; Sedel'nikova, TS; Efremov, SP; Pimenov, AV	Genetic Polymorphism of Siberian Stone Pine (<i>Pinus sibirica</i> Du Tour) in Kuznetsk Alatau	CONTEMPORARY PROBLEMS OF ECOLOGY	Article	Pinus sibirica; microsatellites; genetic diversity; heterozygosity; Kuznetsk Alatau	The DNA polymorphism of seven coenopopulations of Siberian stone pine (Pinus sibirica Du Tour) growing in a region which is typical for mountain taiga pine forests-the northeastern part of the Kuznetsk Alatau-has been studied. According to the data of 11 nuclear microsatellite loci, 44 allelic variants which significantly differed between the studied coenopopulations in composition and frequency …	2020	13	6	http://dx.doi.org/10.1134/S1995425520060116	WOS:000601534600001
53	J	Acheré, V; Favre, JM; Besnard, G; Jeandroz, S	Genomic organization of molecular differentiation in Norway spruce (<i>Picea abies</i>)	MOLECULAR ECOLOGY	Article	intraspecific differentiation; mapped markers; natural selection; outlier loci; Picea abies	Diversity and differentiation among three populations representing the geographical domains commonly recognized within the natural distribution area of Picea abies were analysed by using a set of 292 AFLP (amplified fragment length polymorphism), SSR (single sequence repeat) and ESTP (expressed sequence tags polymorphism) markers. As usually observed in forest trees, results showed high within-po…	2005	14	10	http://dx.doi.org/10.1111/j.1365-294X.2005.02646.x	WOS:000231223000024
54	J	Dzialuk, A; Czarnecki, J; Gout, R; Filipiak, M	Origin of silver fir (<i>Abies alba</i> Mill.) from Osusznica Forest District revealed by cytoplasmic DNA markers - refugium of Sudety fir in Pomerania?	SYLWAN	Article	origin of silver fir; Abies alba; mt DNA; cp DNA; genetic markers	Dzialuk A., Czarnecki J., Gout R., Filipiak M. 2013. Pochodzenie jodly pospolitej (Abies alba Mill.) z Nadlesnictwa Osusznica w swietle badan DNA cytoplazmatycznego - ostoja jodly sudeckiej na Pomorzu? Sylwan 157 (2): 139-148. Genetic markers in mitochondrial and chloroplast DNA were analysed to determine the native status and possibly trace the origin of the silver fir (Abies alba Mill.) growing…	2013	157	2		WOS:000317313800007
55	J	Scotti, I; Magni, F; Fink, R; Powell, W; Binelli, G; Hedley, P	Microsatellite repeats are not randomly distributed within Norway spruce (<i>Picea abies</i> K.) expressed sequences	GENOME	Article	Picea abies; microsatellites; SSRs; ESTs; population genetics; trees	A Norway spruce (Picea abies K.) cDNA library obtained from vegetative bud tissue was screened for the presence of (AG)(n) and (AC)(n) microsatellite repeats. Ten (AG)(n) and six (AC)(n) microsatellites were found, with an average length of 25.5 repeat units. Most of the microsatellites are simple perfect repeats. The microsatellite distribution within the clones is clearly non-random, with diffe…	2000	43	1	http://dx.doi.org/10.1139/gen-43-1-41	WOS:000085083600006
56	J	De Luca, D; Menale, B; Caputo, P; Cennamo, P	Population genetics analysis in a relic population of silver fir (<i>Abies alba</i> Mill.) in southern Italy: A comparison with microsatellites and reference data	PLANT BIOSYSTEMS	Article	Abies alba; relic populations; conservation; nSSR markers; cpSSR markers; southern Italy	We investigated the genetic diversity of the last natural population of Abies alba Mill. in Campania region (southern Italy) using nuclear and chloroplast microsatellite markers. We found high genetic diversity despite small population size and geographic isolation, especially when comparing our microsatellite data with information from the literature.	2017	151	4	http://dx.doi.org/10.1080/11263504.2016.1186124	WOS:000402018200001
57	J	Dostálek, J; Frantík, T; Pospísková, M; Krízová, M	Population genetic structure and delineation of conservation units in European larch (<i>Larix decidua</i> Mill.) across its native range	FLORA	Article	Larix decidua; Among-population variability; SSR; Genetic diversity; Genetic structure; Microsatellites	Conservation of the intraspecific genetic diversity of trees is crucial for long-term forest sustainability, especially in the expected scenario of climate change. Larix decidua is an excellent example of a very common species for which better knowledge of the population genetic structure is needed. The aim of this study was to examine the molecular genetic variability of L. decidua in the Alps a…	2018	246		http://dx.doi.org/10.1016/j.flora.2018.06.007	WOS:000443176800004
58	J	Polak-Berecka, M; Perchlicka, I	Isozyme polymorphism and genetic variation of selected partial populations of Istebna spruce [<i>Picea abies</i> (L.) Karst]	SYLWAN	Article	genetic diversity; isozyme polymorphism; Picea abies; Poland	The genetic Structure of Norway spruce [Picea abies (L.) Karst] of the Istebna race was studied in two populations from the Carpathian seed stands in the Malinka and Czarne Forestries. The recent provenance test results have shown a high quality of both populations. The results were compared with the genetic variation parameters Calculated for the selected seed stand from the Bukowice Forestry (c…	2007	151	10		WOS:000256600200005
59	J	Bonciu, E; Olaru, AL; Slusarczyk, J	THE MAIN CHARACTERISTICS OF THE GENETIC SYSTEM IN SOME FOREST TREE SPECIES	SCIENTIFIC PAPERS-SERIES A-AGRONOMY	Article	genetic system; forest tree; recombination; chromosomal cycle	The genetic system represents the genetic pathway of organisms for organizing and transmitting genetic material that determines the balance between coherence, gene recombination, and control over the amount and type of gene combinations. The objective of this paper is to present the main characteristics of the genetic system of several species of forest trees, namely: Picea abies, Abies alba, Lar…	2023	66	1		WOS:001112923300065
60	J	Komárková, M; Cáp, J; Trcková, O; Dostál, J; Máchová, P	Comparison of population genetic structure of Pinus mugo Turra forest stands in the Giant Mountains by analysis of nSSR molecular marker data	FORESTRY	Article; Early Access	genetic differentiation; forest stands differentiation; population structure; SSR analysis; Pinus mugo	Pinus mugo (dwarf mountain pine) communities in the protected area of Krkono & scaron;e National Park are extremely valuable. After extensive deforestation during the sixteenth to nineteenth centuries, P. mugo recovered naturally in some parts of the Giant Mountains, and in some places imported seeds were likely used for reforestation. To distinguish between native and possibly introduced local P…	2024			http://dx.doi.org/10.1093/forestry/cpae042	WOS:001283538100001
61	J	Jeandroz, S; Collignon, AM; Favre, JM	RAPD and mtDNA variation among autochthonous and planted populations of <i>Picea abies</i> from the Vosges mountains (France) in reference to other French populations	FOREST ECOLOGY AND MANAGEMENT	Article; Proceedings Paper	RAPD; mtDNA; autochtony; seed transfer; Picea abies	RAPD phenotypic analysis (AMOVA and FCA) allowed to determine three groups among the Picea abies French genetic resources: the Vosges (autochthonous and planted populations), the Alps/Jura and the Southern Alps. The within-population values of gene diversity (He) did not differ significantly. MtDNA analysis at locus mh44 has revealed that one major size variant, characteristic of the Alpine domai…	2004	197	45717	http://dx.doi.org/10.1016/j.foreco.2004.05.015	WOS:000223382700019
62	J	Cheddadi, R; Birks, HJB; Tarroso, P; Liepelt, S; Gömöry, D; Dullinger, S; Meier, ES; Hülber, K; Maiorano, L; Laborde, H	Revisiting tree-migration rates: <i>Abies alba</i> (Mill.), a case study	VEGETATION HISTORY AND ARCHAEOBOTANY	Article	Migration rate; Biogeography; Abies alba; Pollen; DNA; Holocene	At northern temperate latitudes trees have adjusted their ranges substantially in response to changing climates during the Holocene. Results from dispersal model simulations suggest that postglacial migration rates may have been over-estimated from fossil pollen data. As a contribution to this debate, we infer the migration rates of Abies alba (Mill.), silver fir, as a case-study species, by usin…	2014	23	2	http://dx.doi.org/10.1007/s00334-013-0404-4	WOS:000330993100003
63	J	Maghuly, F; Nittinger, F; Pinsker, W; Praznik, W; Fluch, S	Differentiation among Austrian populations of Norway spruce [<i>Picea abies</i> (L.) Karst.] assayed by mitochibdrial DNA markers	TREE GENETICS & GENOMES	Article	mitochondrial DNA; population differentiation; Picea abies; eastern Alps	Thirty-seven populations of Norway spruce [Picea abies (L.) Karst.] across the Austrian Alps and Bohemian Massif were sampled to elucidate the geographical pattern of genetic differentiation. Three polymorphic mitochondrial DNA (mtDNA) loci were surveyed. Two or three alleles were detected at each locus, resulting in seven multilocus mtDNA haplotypes (A-F). Western populations proved to be monomo…	2007	3	3	http://dx.doi.org/10.1007/s11295-006-0055-z	WOS:000247665900002
64	J	Sarri, V; Minelli, S; Panara, F; Morgante, M; Jurman, I; Zuccolo, A; Gionini, PG	Characterization and chromosomal organization of satellite DNA sequences in <i>Picea abies</i>	GENOME	Article	chromosomal organization; FISH; Picea abies; ribosomal cistrons; satellite DNA	Three clones containing satellite DNA sequences were selected from a randomly sheared genomic DNA library of Picea abies (clones PAF1, PAG004P22F (2F), and PAG004E03C (3C). PAFI contained 7 repeats that were 37-55 bp in length and had 68.9%-91.9% nucleotide sequence similarity. Two 2F repeats were 305-306 bp in length and had 83% sequence similarity. Two 3C repeats were 193-226 bp in length and h…	2008	51	9	http://dx.doi.org/10.1139/G08-048	WOS:000259577000005
65	J	Mihai, G; Alexandru, A; Mirancea, I	Genetic variation and early selection in Larix decidua Mill. from progeny test in Romania	ANNALS OF FOREST SCIENCE	Article	Larix decidua; Quantitative traits; Genetic variation; Heritability; Genetic correlations; Genetic gain; Early selection; European larch	Key messageHigh genetic variation and determinism for quantitative traits ofLarix deciduaMill. were found in a progeny test established at its south-eastern limit of distribution area. The top range families are from both native populations and artificial stands of unknown origin. Recurrent selection at the nursery stage based on total height can reduce the generation time and increase the geneti…	2019	76	3	http://dx.doi.org/10.1007/s13595-019-0864-5	WOS:000478566700001
66	J	Zhang, HX; Zhang, ML; Williams, DM	Genetic evidence and species distribution modelling reveal the response of <i>Larix sibirica</i> and its related species to Quaternary climatic and ancient historical events	BIOCHEMICAL SYSTEMATICS AND ECOLOGY	Article	Larix sibirica; Refugia; SDM; Disjunction; Quaternary climate change; Altai and Tianshan Mountains	Larix Mill., a boreal forest genus, distributes in Eurasia and North America. Larix sibirica and some related species of this genus have wide distributions in the northeastern, northwestern and southwestern regions of China. To elucidate the response of populations to different regional historical events, we investigated the spatial genetic structures and the divergence time of genotypes in these…	2014	54		http://dx.doi.org/10.1016/j.bse.2014.02.017	WOS:000337769700052
67	J	Ranade, SS; Lin, YC; Van de Peer, Y; García-Gil, MR	Comparative <i>in silico</i> analysis of SSRs in coding regions of high confidence predicted genes in Norway spruce (<i>Picea abies</i>) and Loblolly pine (<i>Pinus taeda</i>)	BMC GENETICS	Article	Norway spruce; Picea abies; Loblolly pine; Pinus taeda; Simple sequence repeats (SSR); Microsatellites; High confidence genes	Background: Microsatellites or simple sequence repeats (SSRs) are DNA sequences consisting of 1-6 bp tandem repeat motifs present in the genome. SSRs are considered to be one of the most powerful tools in genetic studies. We carried out a comparative study of perfect SSR loci belonging to class I (>= 20) and class II (>= 12 and < 20 bp) types located in coding regions of high confidence genes in …	2015	16		http://dx.doi.org/10.1186/s12863-015-0304-y	WOS:000367134100001
69	J	Robin, C; Wagner, S; Baubet, O; Ehrenmann, F; Castagneyrol, B; Capdevielle, X; Fabreguettes, O; Petit, RJ; Piou, D	Effects of the cascading translocations of larch (<i>Larix decidua</i> Mill.) on canker disease due to <i>Lachnellula willkommii</i> (R. Hartig) Dennis	ANNALS OF FOREST SCIENCE	Article	Larix decidua; Lachnellula willkommii; Assisted migration; Admixture; Disease prevalence	Key messageAppropriate silvicultural practices combined with the use of resistant Central European provenances can reduce the prevalence of larch canker caused by Lachnellula willkommii (R. Hartig) Dennis, a major disease affecting larch plantations in France. However, cascading translocations have resulted in frequent admixture in European larch (Larix decidua Mill.) and subsequent certification…	2023	80	1	http://dx.doi.org/10.1186/s13595-023-01200-z	WOS:001040286900002
70	J	Novikova, SV; Sharov, VV; Oreshkova, NV; Simonov, EP; Krutovsky, KV	Genetic Adaptation of Siberian Larch (<i>Larix sibirica</i> Ledeb.) to High Altitudes	INTERNATIONAL JOURNAL OF MOLECULAR SCIENCES	Article	adaptation; admixture; altitudes; BayeScEnv; bioclimatic variables; conifer; ddRADseq; F (ST); Larix sibirica; LFMM; outlier; PCAdapt; RDA; Siberian larch; SNPs	Forest trees growing in high altitude conditions offer a convenient model for studying adaptation processes. They are subject to a whole range of adverse factors that are likely to cause local adaptation and related genetic changes. Siberian larch (Larix sibirica Ledeb.), whose distribution covers different altitudes, makes it possible to directly compare lowland with highland populations. This p…	2023	24	5	http://dx.doi.org/10.3390/ijms24054530	WOS:000948234800001
71	J	Titievsky, A; Putintseva, YA; Taranenko, EA; Baskin, S; Oreshkova, NV; Brodsky, E; Sharova, AV; Sharov, VV; Panov, J; Kuzmin, DA; Brodsky, L; Krutovsky, KV	Comparative Genomics Analysis of Repetitive Elements in Ten Gymnosperm Species: "Dark Repeatome" and Its Abundance in Conifer and <i>Gnetum</i> Species	LIFE-BASEL	Article	gymnosperms; repetitive elements; principal component analysis	Repetitive elements (RE) and transposons (TE) can comprise up to 80% of some plant genomes and may be essential for regulating their evolution and adaptation. The "repeatome" information is often unavailable in assembled genomes because genomic areas of repeats are challenging to assemble and are often missing from final assembly. However, raw genomic sequencing data contain rich information abou…	2021	11	11	http://dx.doi.org/10.3390/life11111234	WOS:000727256900001
72	J	Ballian, D; Kajba, D	Estimation of the isoenzyme genetic variability of the silver fir (<i>Abies alba</i> Mill.) from the area of Gorski Kotar (Croatia)	PERIODICUM BIOLOGORUM	Article	genetic variability; isoenzymes; Abies alba; Croatia	Background and Purpose: The largest cover of silver fir (Abies alba Mill.) forests in Croatia is in regions of Gorski Kotar and Lika, with the total of 200 000 ha. For a decades, those forest have been exposed to deteriorating air pollution and in recent years to draught which resulted in increased dieback (in some stands up to 80% trees are significantly damaged). For that reason it is necessary…	2005	107	1		WOS:000229407300011
73	J	Sagnard, F; Barberot, C; Fady, B	Structure of Genetic diversity in <i>Abies alba</i> Mill. from southwestern Alps:: multivariate analysis of adaptive and non-adaptive traits for conservation in France	FOREST ECOLOGY AND MANAGEMENT	Article	Abies alba; isozymes; terpenes; adaptive traits; ecological structure; conservation	Abies alba is one of the major European mountain forest species for which a gene resource conservation network exists in France. However, scattered populations from southwestern Alps (,southeastern France) are poorly represented in this network. Using a sample of 16 populations, two of which are already included in the network, the structural pattern of genetic diversity was investigated to help …	2002	157	45717	http://dx.doi.org/10.1016/S0378-1127(00)00664-2	WOS:000174495000016
74	J	Galovic, V; Sijacic-Nikolic, M; Safhauzer, R; Cortan, D; Orlovic, S	GENETIC DIFFERENTIATION OF NORWAY SPRUCE (<i>Picea abies</i> (L.) Karst.) TREES WITH DIFERENT CROWN TYPES FROM THE MOUNTAIN GOLIJA	GENETIKA-BELGRADE	Article	Picea abies (L.) Karst; microsatellite; genetic differentiation; Golija	The knowledge of genetic diversity degree of given species is of great importance for the successful process of breeding and genetic conservation. The aim of conducted research was to determine the genetic differentiation of Norway spruce (Picea abies (L.) Karst) genotypes with very specific narrow pyramidal and normal crown type, which grows at different altitude of the mountain Golija. For asse…	2015	47	3	http://dx.doi.org/10.2298/GENSR1503849G	WOS:000369703300008
75	J	Roschanski, AM; Fady, B; Ziegenhagen, B; Liepelt, S	ANNOTATION AND RE-SEQUENCING OF GENES FROM DE NOVO TRANSCRIPTOME ASSEMBLY OF <i>ABIES ALBA</i> (PINACEAE)	APPLICATIONS IN PLANT SCIENCES	Article	Abies alba; adaptation; annotation; candidate genes; de novo sequencing; Pinaceae	Premise of the study: We present a protocol for the annotation of transcriptome sequence data and the identification of candidate genes therein using the example of the nonmodel conifer Abies alba. Methods and Results: A normalized cDNA library was built from an A. alba seedling. The sequencing on a 454 platform yielded more than 1.5 million reads that were de novo assembled into 25 149 contigs. …	2013	1	1	http://dx.doi.org/10.3732/apps.1200179	WOS:000342469100005
76	J	Sokolowska, J; Fuchs, H; Celinski, K	New Insight into Taxonomy of European Mountain Pines, <i>Pinus mugo</i> Complex, Based on Complete Chloroplast Genomes Sequencing	PLANTS-BASEL	Article	Pinaceae; European mountain pines; closely related taxa; next-generation sequencing	The Pinus mugo complex is a large group of closely related mountain pines, which are an important component of the ecosystems of the most important mountain ranges, such as the Alps, Carpathians and Pyrenees. The phylogenetic relationships between taxa in this complex have been under discussion for many years. Despite the use of many different approaches, they still need to be clarified and suppl…	2021	10	7	http://dx.doi.org/10.3390/plants10071331	WOS:000677045800001
77	J	Wojnicka-Poltorak, A; Wachowiak, W; Prus-Glowacki, W; Celinski, K; Korczyk, A	Genetic heterogeneity in age classes of naturally regenerated old growth forest of <i>Picea abies</i> (L.) Karst	SILVAE GENETICA	Article	cpSSR markers; age dynamics; genetic diversity; Bialowieza Primeval Forest; Picea abies	The Bialowieza Primeval Forest is located northeastern Poland. It is one of Europe's most precious old growth forests in terms of abundance and richness of vegetation, retaining features of a primeval lowland forest which cannot be found anywhere else on the European continent. The aim of the study was to assess the genetic heterogeneity of the naturally regenerated Picea abies population using f…	2014	63	5	http://dx.doi.org/10.1515/sg-2014-0024	WOS:000358885500001
78	J	Arnerup, J; Swedjemark, G; Elfstrand, M; Karlsson, B; Stenlid, J	Variation in growth of <i>Heterobasidion parviporum</i> in a full-sib family of <i>Picea abies</i>	SCANDINAVIAN JOURNAL OF FOREST RESEARCH	Article	Genetic variation; Heterobasidion; mapping quantitative trait loci (QTL); Picea abies	Heterobasidion parviporum (Fr.) Niemela & Korhonen and Heterobasidion annosum (Fr.) Bref. sensu lato are some of the major forest pathogens in the northern hemisphere causing root and butt rot to conifers. The relative susceptibility to H. parviporum was investigated in a full-sib family of Norway spruce [Picea abies (L.) Karst.] by inoculating a set of 252 cloned progenies from a controlled cros…	2010	25	2	http://dx.doi.org/10.1080/02827581003730799	WOS:000277017300002
80	J	Chaiprasongsuk, M; Zhang, C; Qian, P; Chen, XL; Li, GL; Trigiano, RN; Guo, H; Chen, F	Biochemical characterization in Norway spruce (<i>Picea abies</i>) of SABATH methyltransferases that methylate phytohormones	PHYTOCHEMISTRY	Article	Picea abies; Norway spruce; SABATH methyltransferase; Jasmonic acid	Indole-3-acetic acid (IAA), gibberellins (GAs), salicylic acid (SA) and jasmonic acid (JA) exist in methyl ester forms in plants in addition to their free acid forms. The enzymes that catalyze methylation of these carboxylic acid phytohormones belong to a same protein family, the SABATH methyltransferases. While the genes encoding these enzymes have been isolated from a small number of flowering …	2018	149		http://dx.doi.org/10.1016/j.phytochem.2018.02.010	WOS:000430778200014
81	J	Mosca, E; Cruz, F; Gómez-Garrido, J; Bianco, L; Rellstab, C; Brodbeck, S; Csilléry, K; Fady, B; Fladung, M; Fussi, B; Gömöry, D; González-Martínez, SC; Grivet, D; Gut, M; Hansen, OK; Heer, K; Kaya, Z; Krutovsky, KV; Kersten, B; Liepelt, S; Opgenoorth, L; Sperisen, C; Ullrich, KK; Vendramin, GG; Westergren, M; Ziegenhagen, B; Alioto, T; Gugerli, F; Heinze, B; Höhn, M; Troggio, M; Neale, DB	A Reference Genome Sequence for the European Silver Fir (<i>Abies alba</i> Mill.): A Community-Generated Genomic Resource	G3-GENES GENOMES GENETICS	Article	Abies alba; annotation; conifer genome; genome assembly; chloroplast genome	Silver fir (Abies alba Mill.) is a keystone conifer of European montane forest ecosystems that has experienced large fluctuations in population size during during the Quaternary and, more recently, due to land-use change. To forecast the species' future distribution and survival, it is important to investigate the genetic basis of adaptation to environmental change, notably to extreme events. For…	2019	9	7	http://dx.doi.org/10.1534/g3.119.400083	WOS:000475396300001
82	J	Valcu, CM; Lalanne, C; Plomion, C; Schlink, K	Heat induced changes in protein expression profiles of Norway spruce (<i>Picea abies</i>) ecotypes from different elevations	PROTEOMICS	Article	Ecotype; Oxidative stress; Picea abies; Small HSP; Thermotolerance	Although tree species typically exhibit low genetic differentiation between populations, ecotypes adapted to different environmental conditions can vary in their capacity to withstand and recover from environmental stresses like heat stress. Two month old seedlings of a Picea abies ecotype adapted to high elevation showed lower level of thermotolerance and higher level of tolerance to oxidative s…	2008	8	20	http://dx.doi.org/10.1002/pmic.200700992	WOS:000260717300015
83	J	Bobowicz, MA; Danielewicz, W; Pieczynska, B; Wojnicka-Poltorak, A; Prus-Glowacki, W	Isoenzymatic variability in progeny of <i>Pinus mugo</i> Turra x <i>Pinus sylvestris</i> L. hybrids from Bor na Czerwonem, in experimental culture	ACTA SOCIETATIS BOTANICORUM POLONIAE	Article	Pinus mugo Turra; Pinus sylvestris L.; hybrids; genetic structure; isoenzymes; introgression	The article describes the genetic structure of 12-year old seedlings. They were grown in an experimental culture representing the progeny of natural hybrids of Pinus mugo Turra and Pinus sylvestris L. from the peatbog Bor na Czerwonem. The studies were carried out on seedlings, employing electrophoresis of enzymatic proteins from winter buds. Parallel isoenzymatic analyses were also conducted for…	2000	69	2		WOS:000088097000010
84	J	Ballian, D; Bogunic, F; Bajric, M; Kajba, D; Kraigher, H; Konnert, M	The genetic population study of Balkan Silver Fir (<i>Abies alba</i> Mill.)	PERIODICUM BIOLOGORUM	Article	Silver fir; (Abies alba); isoenzymes; migration route; Western Balkan	Background and Purpose: Silver fir (Abies alba Mill.) is one of the most important forest tree species in the Western Balkan area from both economic and ecological aspect. Its distribution has for years been the subject of scientific research, the reason being that silver fir from these areas displays very interesting morphological and genetic differentiation. Material and methods: The developmen…	2012	114	1		WOS:000304295200008
85	J	Collignon, AM; Favre, JM	Contribution to the postglacial history at the western margin of <i>Picea abies'</i> natural area using RAPD markers	ANNALS OF BOTANY	Article	Picea abies; Norway spruce; phylogeography; phenotypic diversity; correspondence analysis; RAPD	RAPD analysis was used (I) to assess the diversity of indigenous Picea abies within the French massifs (Alps. Jura and Vosges) in comparison with the Hercyno-Carpathian and Alpine domains (central Europe); and (2) to examine the molecular relationships among provenances of these massifs and domains. One hundred and thirty-seven polymorphic RAPD fragments were screened. Results showed that the phe…	2000	85	6	http://dx.doi.org/10.1006/anbo.2000.1119	WOS:000087472000002
86	J	Gugerli, F; Rüegg, M; Vendramin, GG	Gradual decline in genetic diversity in Swiss stone pine populations (<i>Pinus cembra</i>) across Switzerland suggests postglacial re-colonization into the Alps from a common eastern glacial refugium	BOTANICA HELVETICA	Article	Chloroplast microsatellites; Core-periphery populations; Genetic differentiation; Haplotype diversity; Pinus cembra	Molecular genetic markers may reveal informative patterns of population processes such as historical migration, which may substantiate inference on postglacial re-colonization inferred, e.g., from fossil records. Palynological records of Swiss stone pine (Pinus cembra) suggest that the species has re-colonized the central Alps from a southeastern Alpine refugium after the last glacial maximum. Su…	2009	119	1	http://dx.doi.org/10.1007/s00035-009-0052-6	WOS:000270799900003
87	J	Klavina, D; Zaluma, A; Pennanen, T; Velmala, S; Gattnieks, T; Gailis, A; Menkis, A	Seed Provenance Impacts Growth and Ectomycorrhizal Colonisation of <i>Picea abies</i> Seedlings	BALTIC FORESTRY	Article	Picea abies; forest nursery; seed provenance; ectomycorrhiza; fungal community	We studied morphological parameters and ectomycorrhizal (ECM) fungal colonisation of Norway spruce (Picea abies) seedlings produced from seeds of Western (W1 and W2 provenances), Central (C1 and C2 provenances) and Eastern (E1 provenance) seed regions in Latvia. In total, 50 seedlings of each seed provenance were cultivated in a sphagnum peat substrate in the plastic pots, which were randomly arr…	2015	21	2		WOS:000368757900002
88	J	Scotti, I; Burelli, A; Cattonaro, F; Chagné, D; Fuller, J; Hedley, PE; Jansson, G; Lalanne, C; Madur, D; Neale, D; Plomion, C; Powell, W; Troggio, M; Morgante, M	Analysis of the distribution of marker classes in a genetic linkage map:: a case study in Norway spruce (<i>Picea abies</i> karst)	TREE GENETICS & GENOMES	Article	Picea abies; conifers; linkage map; genome structure; molecular markers; autocorrelation	In order to analyze the large-scale structure of the genome of Norway spruce (Picea abies Karst.), a pseudo-testcross genetic linkage map was built using markers of six different types, belonging to the low (amplified fragment length polymorphisms, simple sequence repeats) or high (sequence-specific amplified polymorphisms, inter-retrotransposon amplified polymorphisms) copy-number fraction of th…	2005	1	3	http://dx.doi.org/10.1007/s11295-005-0012-2	WOS:000244896200002
89	J	Schubert, R; Mueller-Starck, G; Riegel, R	Development of EST-PCR markers and monitoring their intrapopulational genetic variation in <i>Picea abies</i> (L.) Karst.	THEORETICAL AND APPLIED GENETICS	Article	cDNA sequencing; EST-PCR markers; isoenzyme gene markers; intrapopulational variation; Picea abies	Fifteen cDNA sequences are reported for the European coniferous forest tree species Norway spruce [Picea abies (L.) Karst.], including the results of similarity searches in public electronic databases. The sequences were subsequently employed for the design of specific primer pairs and PCR-based amplification of genomic fragments. For seven primer pairs, polymorphic EST-PCR markers were identifie…	2001	103	8	http://dx.doi.org/10.1007/s001220000501	WOS:000173261300014
90	J	Bernhardsson, C; Vidalis, A; Wang, X; Scofield, DG; Schiffthaler, B; Baison, J; Street, NR; García-Gil, MR; Ingvarsson, PK	An Ultra-Dense Haploid Genetic Map for Evaluating the Highly Fragmented Genome Assembly of Norway Spruce (<i>Picea abies</i>)	G3-GENES GENOMES GENETICS	Article	genetic map; Norway spruce; Picea abies; sequence capture; genome assembly	Norway spruce (Picea abies (L.) Karst.) is a conifer species of substanital economic and ecological importance. In common with most conifers, the P. abies genome is very large (similar to 20 Gbp) and contains a high fraction of repetitive DNA. The current P. abies genome assembly (v1.0) covers approximately 60% of the total genome size but is highly fragmented, consisting of >10 million scaffolds…	2019	9	5	http://dx.doi.org/10.1534/g3.118.200840	WOS:000467271400031
91	J	Gömöry, D; Paule, L; Krajmerová, D; Romsáková, I; Longauer, R	Admixture of genetic lineages of different glacial origin: a case study of Abies alba Mill. in the Carpathians	PLANT SYSTEMATICS AND EVOLUTION	Article	Abies alba Mill.; Postglacial colonization; Admixture; Cline	Genetic exchange between divergent lineages of silver fir (Abies alba Mill.) was studied in the Ukrainian Carpathians where two expanding populations originating from different glacial refugia meet. The study included 33 silver fir populations from Ukraine, Romania and Slovakia which were investigated using the maternally inherited mitochondrial nad5-4 marker and biparentally inherited nuclear mi…	2012	298	4	http://dx.doi.org/10.1007/s00606-011-0580-6	WOS:000301785700002
92	J	Rellstab, C; Dauphin, B; Zoller, S; Brodbeck, S; Gugerli, F	Using transcriptome sequencing and pooled exome capture to study local adaptation in the giga-genome of <i>Pinus cembra</i>	MOLECULAR ECOLOGY RESOURCES	Article	conifer; exome capture; paralogs; pine; Pool-Seq; transcriptome assembly	Despite decreasing sequencing costs, whole-genome sequencing for population-based genome scans for selection is still prohibitively expensive for organisms with large genomes. Moreover, the repetitive nature of large genomes often represents a challenge in bioinformatic and downstream analyses. Here, we use in-depth transcriptome sequencing to design probes for exome capture in Swiss stone pine (…	2019	19	2	http://dx.doi.org/10.1111/1755-0998.12986	WOS:000459815200019
93	J	García-García, I; Méndez-Cea, B; Gallego, FJ; Linares, JC; Horreo, JL	Genomic insights into climate change-induced forest dieback in <i>Abies alba</i> hotspots of decline	EUROPEAN JOURNAL OF FOREST RESEARCH	Article; Early Access	Adaptation; <italic>Abies alba</italic>; Forest decline; DNA methylation; Genetic diversity; Relatedness	Understanding adaptive genetic responses to climate change is an issue of utmost importance to improve conservation policies and adaptive management. This study deeps on it, focusing on rear-edge silver fir (Abies alba) forests, where decline has been reported and linked to climatic stressors, such as warming and recurrent drought events. Hotspots and coldspots of forest decline and mortality wer…	2024			http://dx.doi.org/10.1007/s10342-024-01737-2	WOS:001357682300001
95	J	Vasilyeva, G; Semerikov, V	Application of amplified fragment length polymorphisms markers to study the hybridization between <i>Pinus sibirica</i> and <i>P.pumila</i>	ANNALS OF FOREST RESEARCH	Article	interspecies hybridization; five-needle pines; Pinus sibirica; Pinus pumila; amplified fragment length polymorphisms; AFLP; genetic variation	The genetic diversity of Pinus sibirica, P. pumila, and their hybrids, in a mixed natural stand was studied using amplified fragment length polymorphisms (AFLP). The stand was situated in the northern slope of the Khamar-Daban Ridge. Hybrid trees were determined by their morphological traits in the field. Three AFLP primer combinations detected 167 bands in 35 putative hybrids, and in 25 P. sibir…	2014	57	2		WOS:000349133100002
96	J	Eklöf, H; Bernhardsson, C; Ingvarsson, PK	Comparing the Effectiveness of Exome Capture Probes, Genotyping by Sequencing and Whole-Genome Re-Sequencing for Assessing Genetic Diversity in Natural and Managed Stands of <i>Picea abies</i>	FORESTS	Article	genetic diversity; genotyping; GBS; Norway spruce; Picea abies	Conifer genomes are characterized by their large size and high abundance of repetitive material, making large-scale genotyping in conifers complicated and expensive. One of the consequences of this is that it has been difficult to generate data on genome-wide levels of genetic variation. To date, researchers have mainly employed various complexity reduction techniques to assess genetic variation …	2020	11	11	http://dx.doi.org/10.3390/f11111185	WOS:000594034500001
97	J	Tóth, EG; Tremblay, F; Housset, JM; Bergeron, Y; Carcaillet, C	Geographic isolation and climatic variability contribute to genetic differentiation in fragmented populations of the long-lived subalpine conifer <i>Pinus cembra</i> L. in the western Alps	BMC EVOLUTIONARY BIOLOGY	Article	Diversity; Differentiation; Climatic variability; Gene flow; Isolation; Pinus cembra	Background Genetic processes shape the modern-day distribution of genetic variation within and between populations and can provide important insights into the underlying mechanisms of evolution. The resulting genetic variation is often unequally partitioned within species' distribution range and especially large differences can manifest at the range limit, where population fragmentation and isola…	2019	19	1	http://dx.doi.org/10.1186/s12862-019-1510-4	WOS:000490973600001
98	J	Frank, A; Howe, GT; Sperisen, C; Brang, P; St Clair, JB; Schmatz, DR; Heiri, C	Risk of genetic maladaptation due to climate change in three major European tree species	GLOBAL CHANGE BIOLOGY	Article	Abies alba; climate change; Fagus sylvatica; genecology; local adaptation; Picea abies; quantitative traits; relative risk of maladaptation; seedling common garden experiment; water availability	Tree populations usually show adaptations to their local environments as a result of natural selection. As climates change, populations can become locally maladapted and decline in fitness. Evaluating the expected degree of genetic maladaptation due to climate change will allow forest managers to assess forest vulnerability, and develop strategies to preserve forest health and productivity. We st…	2017	23	12	http://dx.doi.org/10.1111/gcb.13802	WOS:000414969000034
99	J	Wang, F; Liang, DY; Pei, XN; Zhang, QH; Zhang, P; Zhang, JQ; Lu, ZM; Yang, YC; Liu, GF; Zhao, XY	Study on the physiological indices of Pinus sibirica and Pinus koraiensis seedlings under cold stress	JOURNAL OF FORESTRY RESEARCH	Article	Pinus sibirica; P. koraiensis; Cold stress; Membrane system; Antioxidant enzymes	Although Pinus sibirica and Pinus koraiensis are resistant to cold or low temperatures in the cold temperate regions of the northern hemisphere, the former has a stronger cold resistance. Research has been limited to the comparison of physiological responses of the two species to cold stress. In this study, 5-year-old seedlings of P. sibirica and P. koraiensis were subjected to six temperature tr…	2019	30	4	http://dx.doi.org/10.1007/s11676-018-0833-0	WOS:000474421600010
100	J	De Sousa, SN; Finkeldey, R; Gailing, O	Experimental verification of microsatellite null alleles in Norway spruce (<i>Picea abies</i> [L.] Karst.):: Implications for population genetic studies	PLANT MOLECULAR BIOLOGY REPORTER	Article	inheritance analysis; megagametophyte; microsatellites; null alleles; Picea abies K	Three stands of Picea abies [L.] Karst. with different density in the Harz Mountains (Lower Saxony, Germany) were characterized at 4 microsatellite loci. An excess of homozygotes was observed in all 3 stands at I simple sequence repeat (SSR) locus, suggesting the presence of null alleles. To test for the segregation of a null allele, 24 open-pollinated seeds (haploid megagametophytes and embryos)…	2005	23	2		WOS:000233144500001
101	J	Meloni, M; Perini, D; Binelli, G	The distribution of genetic variation in Norway spruce (<i>Picea abies</i> Karst.) populations in the western Alps	JOURNAL OF BIOGEOGRAPHY	Article	conservation genetics; genetic diversity; glacial refugia; maritime Alps; microsatellites; Picea abies Karst; re-colonization	Aim In order to look for a possible centre of survival for the Norway spruce (Picea abies Karst.) in the south-western Alps, six natural populations of this area were investigated by means of genetic markers in order to assess the degree and the distribution of genetic diversity within the species. Location Western and South-western Alps. Methods Populations were genotyped using seven simple sequ…	2007	34	6	http://dx.doi.org/10.1111/j.1365-2699.2006.01668.x	WOS:000247264800001
102	C	Konnert, M; Hussendörfer, E	Genetic variation of silver fir (<i>Abies alba</i>) in unevenaged forests ("Plenter" forest) in comparison with evenaged forests (Altersklassenwald)	GENETIC RESPONSE OF FOREST SYSTEMS TO CHANGING ENVIRONMENTAL CONDITIONS	Proceedings Paper	genetic variation; Abies alba; isozymes; silviculture; sustainable forest management	In order to elucidate the effects of management systems on the existing potential of biodiversity the genetic variation of silver fir (Abies alba) in unevenaged forests ("Plenter" forests) and evenaged forests (Altersklassenwald) was investigated by means of isozyme gene-markers at 14 to 16 gene loci. In total about 3300 adult silver firs in 9 Plenter" forests and 16 evenaged forests in Switzerla…	2001	70			WOS:000175261600025
103	J	Lendvay, B; Höhn, M; Brodbeck, S; Mîndrescu, M; Gugerli, F	Genetic structure in <i>Pinus cembra</i> from the Carpathian Mountains inferred from nuclear and chloroplast microsatellites confirms post-glacial range contraction and identifies introduced individuals	TREE GENETICS & GENOMES	Article	Disjunct distribution; Gene flow; Genetic drift; Molecular markers; Population bottleneck	Genetic differentiation of scattered populations at neutral loci is characterized by genetic drift counteracted by the remaining gene flow. Populations of Pinus cembra in the Carpathian Mountains are isolated and restricted to island-like stands at high-elevation mountain ranges. In contrast, paleobotanical data suggest an extended early Holocene distribution of P. cembra in the Carpathians and i…	2014	10	5	http://dx.doi.org/10.1007/s11295-014-0770-9	WOS:000342229000024
104	J	Piovani, P; Leonardi, S; Magnani, F; Menozzi, P	Variability of stomatal conductance in a small and isolated population of silver fir (<i>Abies alba</i> Mill.)	TREE PHYSIOLOGY	Article	Abies alba; adaptive capacity; climatic change; drought; relic population; stomatal conductance	We analyzed the response to drought of 420 individuals from eight half-sib families from a small and isolated population of silver fir (Abies alba Mill.): 105 of them were kept in well-watered conditions as control while the remaining 315 were exposed to drought for 27 days. A model describing stomatal behavior derived from Monteith and developed in beech by Leonardi et al. was fitted to experime…	2011	31	5	http://dx.doi.org/10.1093/treephys/tpr029	WOS:000291893600005
105	J	Teodosiu, M; Mihai, G; Fussi, B; Ciocîrlan, E	Genetic diversity and structure of Silver fir (<i>Abies alba</i> Mill.) at the south-eastern limit of its distribution range	ANNALS OF FOREST RESEARCH	Article	Abies alba; nuclear microsatellites markers; genetic diversity; differentiation; genetic structure	In the Romanian Carpathians, Silver fir covers about 5% of the forest area and is the second most important conifer species. Although there are a number of genetic studies concerning the distribution of genetic diversity of Abies alba in Europe, populations from the south-eastern limit of the distribution range have been studied less. The aim of the present study was to assess the genetic diversi…	2019	62	2	http://dx.doi.org/10.15287/afr.2019.1436	WOS:000511118700002
106	J	Chalupka, W; Mejnartowicz, L; Lewandowski, A	Reconstitution of a lost forest tree population:: A case study of Norway spruce (<i>Picea abies</i> [L.] Karst.)	FOREST ECOLOGY AND MANAGEMENT	Article	Picea abies; provenance studies; reconstituted seed orchard; allozymes; genetic variation	A population of Norway spruce (Picea abies (L.) Karst.) from southern Poland, named Kolonowskie 0293, exhibited a very high breeding value among 1100 European populations tested in the IUFRO 1964/1968 provenance experiment. However, the original mother stand of that population no longer exists. Owing to international cooperative efforts, a reconstituted clonal seed orchard of that population was …	2008	255	7	http://dx.doi.org/10.1016/j.foreco.2007.12.014	WOS:000256143900009
107	J	Wojnicka-Póltorak, A; Prus-Glowacki, W; Celinski, K; Korczyk, A	Genetic aspects of age dynamics of a natural <i>Picea abies</i> (L.) Karst. population in the Bialowieza Primeval Forest, Poland	NEW FORESTS	Article	Age dynamics; Genetic differentiation; Primeval population; Picea abies; Natural regeneration	We studied temporal changes in the genetic structure and diversity of a naturally regenerated Picea abies (L.) Karst. (Norway spruce) population in the BiaowieA1/4a Primeval Forest, Poland. The analysis included five age classes of trees: newly germinating seedlings (in laboratory conditions), seedlings up to 3 years old, young trees 4-10 years old, middle-aged trees 11-100 years old, and trees o…	2013	44	6	http://dx.doi.org/10.1007/s11056-013-9367-7	WOS:000327064800001
109	J	Burczyk, J; Lewandowski, A; Chalupka, W	Local pollen dispersal and distant gene flow in Norway spruce (<i>Picea abies</i> [L.] Karst.)	FOREST ECOLOGY AND MANAGEMENT	Article; Proceedings Paper	Picea abies; gene flow; pollen dispersal; mating system; parentage analysis	Pollen gene flow is one of the most important factors influencing genetic structure of wind pollinated forest trees. We investigated mating system, pollen dispersal patterns and the level of pollen immigration in a clonal archive of Norway spruce (Picea abies [L.] Karst.). The plantation consisted of 114 clones originating from different (often distant) parts of Poland. We sampled 100 seeds in up…	2004	197	45717	http://dx.doi.org/10.1016/j.foreco.2004.05.003	WOS:000223382700004
110	J	Oberhuber, W; Geisler, TA; Bernich, F; Wieser, G	Weak Apical Control of Swiss Stone Pine (<i>Pinus cembra</i> L.) May Serve as a Protection against Environmental Stress above Treeline in the Central European Alps	FORESTS	Article	apical control; multi-stemmed growth form; Pinus cembra; treeline	At the treeline in the Central European Alps, adverse climate conditions impair tree growth and cause krummholz formation of Swiss stone pine (Pinus cembra L.). Multi-stemmed trees (tree clusters) are frequently found in the treeline ecotone and are generally thought to originate from seed caches (multiple genets) of the European nutcracker (N. caryocatactes) or due to repeated damage of the lead…	2019	10	9	http://dx.doi.org/10.3390/f10090744	WOS:000487978700086
112	J	Latreille, A; Davi, H; Huard, F; Pichot, C	Variability of the climate-radial growth relationship among <i>Abies</i> <i>alba</i> trees and populations along altitudinal gradients	FOREST ECOLOGY AND MANAGEMENT	Article	Radial growth; Climate; Altitudinal gradient; Abies alba; Mediterranean region	Tree ring widths provide very useful information to assess factors controlling tree radial growth and to estimate future growth trajectories under climate change. Radial growth variability has already been largely studied among tree populations that experience different environmental conditions and was most recently analyzed among individuals within populations. In the present study we assessed, …	2017	396		http://dx.doi.org/10.1016/j.foreco.2017.04.012	WOS:000402217100015
113	J	Heitkam, T; Schulte, L; Weber, B; Liedtke, S; Breitenbach, S; Kögler, A; Morgenstern, K; Brückner, M; Tröber, U; Wolf, H; Krabel, D; Schmidt, T	Comparative Repeat Profiling of Two Closely Related Conifers (<i>Larix decidua</i> and <i>Larix kaempferi</i>) Reveals High Genome Similarity With Only Few Fast-Evolving Satellite DNAs	FRONTIERS IN GENETICS	Article	Larix decidua (Mill.); Larix kaempferi (Lamb.) Carriere; conifer; tandem repeat; retrotransposon; repetitive DNA; fluorescent in situ hybridization	In eukaryotic genomes, cycles of repeat expansion and removal lead to large-scale genomic changes and propel organisms forward in evolution. However, in conifers, active repeat removal is thought to be limited, leading to expansions of their genomes, mostly exceeding 10 giga base pairs. As a result, conifer genomes are largely littered with fragmented and decayed repeats. Here, we aim to investig…	2021	12		http://dx.doi.org/10.3389/fgene.2021.683668	WOS:000677978900001
114	J	Popovic, V; Lucic, A; Rakonjac, L; Milovanovic, J; Mladenovic Drinic, S; Ristic, D	APPLICATION OF SSR MARKERS FOR ASSESSMENT OF GENETIC DIFFERENTIATION OF SILVER FIR (<i>Abies alba</i> Mill.) ORIGINATING FROM JAVOR MOUNTAIN	GENETIKA-BELGRADE	Article	Abies alba Mill.; SSR (Simple Sequence Repeat) markers; population; differentiation	The process of plant breeding and conservation of gene pool among other things depends on the knowledge of the level of genetic differentiation. The aim of research in this paper was to determine the genetic differentiation of silver fir (Abies alba Mill.) populations of regular type and atypical genotypes with pyramidal crown that can be found on Javor mountain, at the site Ogorijevac. The genet…	2019	51	3	http://dx.doi.org/10.2298/GENSR1903103P	WOS:000509981300023
115	J	Skorpík, P; Konrad, H; Geburek, T; Schuh, M; Vasold, D; Eberhardt, M; Schueler, S	Solid Wood Properties Assessed by Non-Destructive Measurements of Standing European Larch (<i>Larix decidua</i> Mill.): Environmental Effects on Variation within and among Trees and Forest Stands	FORESTS	Article	Larix decidua Mill; Pilodyn penetration; stress-wave velocity; wood density; modulus of elasticity; acoustic velocity	To avoid unintentional loss of wood quality when selecting for higher productivity in tree breeding programs, non-destructive methods for fast and reliable assessment of wood quality on standing trees are required. In this study, we tested and applied Pilodyn penetration (PP) and measures of stress wave velocity (SWV) in trees within a European larch (Larix decidua Mill.) breeding program. Throug…	2018	9	5	http://dx.doi.org/10.3390/f9050276	WOS:000435193700051
116	J	Morar, IMT; Rensen, S; Vilanova, S; Boscaiu, M; Holonec, L; Sestras, AF; Vicente, O; Prohens, J; Sestras, RE; Plazas, M	Genetic Relationships and Reproductive Traits of Romanian Populations of Silver Fir (<i>Abies alba</i>): Implications for the Sustainable Management of Local Populations	SUSTAINABILITY	Article	silver fir; Abies alba; germination; SSRs; genetic diversity; inbreeding	Assessment of the diversity of reproductive traits and genetic variation is of great relevance to the conservation of genetic resources and management of silver fir (Abies alba) populations. We have evaluated reproductive characteristics associated with female cones and seed morphology, as well as seed germination after subjecting seeds to five storage methods, in nine Romanian populations of A. …	2020	12	10	http://dx.doi.org/10.3390/su12104199	WOS:000543421400257
119	J	Frank, A; Sperisen, C; Howe, GT; Brang, P; Walthert, L; St Clair, JB; Heiri, C	Distinct genecological patterns in seedlings of Norway spruce and silver fir from a mountainous landscape	ECOLOGY	Article	Abies alba; adaptive genetic variation; Central Europe; climate change; common garden; conifers; evolutionary adaptation; genecology; phenotype-environment associations; Picea abies; quantitative genetics; soils	Understanding the genecology of forest trees is critical for gene conservation, for predicting the effects of climate change and climate change adaptation, and for successful reforestation. Although common genecological patterns have emerged, species-specific details are also important. Which species are most vulnerable to climate change? Which are the most important adaptive traits and environme…	2017	98	1	http://dx.doi.org/10.1002/ecy.1632	WOS:000391862900018
121	J	Nikolic, JS; Zlatkovic, BK; Jovanovic, SC; Stojanovic, GS; Marin, PD; Mitic, ZS	Needle volatiles as chemophenetic markers in differentiation of natural populations of <i>Abies alba</i>, <i>A</i>. x <i>borisii-regis</i>, and <i>A.cephalonica</i>	PHYTOCHEMISTRY	Article	Abies alba; A. cephalonica; A.x borisii-regis; Pinaceae; Headspace; Needle volatiles; Chemodiversity	Seventeen native fir populations from the presumed zones of natural hybridization in the Balkan Peninsula were analyzed using headspace needle volatiles and GC-MS/FID analyses. The multivariate statistical analyses revealed clear differentiation between populations of Abies alba and A. cephalonica, suggesting that Silver and Greek Fir are characterized by distinct volatile profiles. Three populat…	2021	183		http://dx.doi.org/10.1016/j.phytochem.2020.112612	WOS:000631272700005
122	J	Karlsson, B; Swedjemark, G	Genotypic variation in natural infection frequency of <i>Heterobasidion</i> spp. in a <i>Picea abies</i> clone trial in southern Sweden	SCANDINAVIAN JOURNAL OF FOREST RESEARCH	Article	economic gain; genetic variation; Heterobasidion; natural infection; Norway spruce; Picea abies	Natural root and butt rot infection with Heterobasidion spp. was recorded on three occasions in trees from a 20-year-old Norway spruce [Picea abies (L.) Karst.] clone trial. In the first assessment, carried out when the trial had been running for 15 years, 29.5% of the trees felled were infected with Heterobasidion spp., but no statistically significant differences were found between the differen…	2006	21	2	http://dx.doi.org/10.1080/02827580500529969	WOS:000237621600002
123	J	Padutov, VE; Kagan, DI; Ivanovskaya, SL; Baranov, OY; Markevich, TS	GENOGEOGRAPHY OF NORWAY SPRUCE (<i>PICEA ABIES</i> (L.) KARST.) ACCORDING TO THE ANALYSIS OF CYTOPLASMIC DNA	DOKLADY NATSIONALNOI AKADEMII NAUK BELARUSI	Article	Norway spruce; Picea abies; Picetum; chloroplast DNA; mitochondrial DNA; microsatellite analysis; genogeography	Norway spruce (Picea abies (L.) Karst.) is one of the main forest-forming species in Belarus. It plays important economic, ecological and social roles. The spruce forest of the region is characterized by a complex history of the formation of its population genetic structure. The aim of this study was the genogeographic analysis of P. abies populations and the description of regional features of i…	2021	65	4	http://dx.doi.org/10.29235/1561-8323-2021-65-4-439-447	WOS:000692825200007
124	C	Hagman, M	Genetic diversity of Eurasian boreal conifers	PROCEEDINGS OF THE FOURTH INTERNATIONAL CONIFER CONFERENCE: CONIFERS FOR THE FUTURE?	Proceedings Paper	adaptation; biochemical variation; geographical variation; Larix gmelinii; Larix sibirica; molecular variation; morphological variation; Picea abies; Pinus sylvestris	The most important boreal conifers of Eurasia are Scots pine (Pinus sylvestris), Norway spruce (Picea abies incl. P. obovata) and Larches (Larix gmelinii and L. sibirica, incl. L. sukaczewii), all belonging to Pinaceae. All have a very large distribution and their ranges have contracted and expanded repeatedly under climatic changes during the Pleistocene and Holocene. Evolution has thus led to a…	2003		615	http://dx.doi.org/10.17660/ActaHortic.2003.615.17	WOS:000189383500017
125	J	Hohn, M; Gugerli, F; Abran, P; Bisztray, G; Buonamici, A; Cseke, K; Hufnagel, L; Quintela-Sabaris, C; Sebastiani, F; Vendramin, GG	Variation in the chloroplast DNA of Swiss stone pine (Pinus cembra L.) reflects contrasting post-glacial history of populations from the Carpathians and the Alps	JOURNAL OF BIOGEOGRAPHY	Article	Alps; Carpathians; chloroplast microsatellites; Europe; haplotype diversity; Pinaceae; Pinus cembra; post-glacial colonization	Aim To characterize the genetic structure and diversity of Pinus cembra L. populations native to two disjunct geographical areas, the Alps and the Carpathians, and to evaluate the rate of genetic differentiation among populations. Location The Swiss Alps and the Carpathians. Methods We screened 28 populations at three paternally inherited chloroplast simple sequence repeats (cpSSRs) for length va…	2009	36	9	http://dx.doi.org/10.1111/j.1365-2699.2009.02122.x	WOS:000269138000016
126	J	Tang, W; Newton, RJ	Genetic transformation of conifers and its application in forest biotechnology	PLANT CELL REPORTS	Review	Agrobacterium; conifer; genetic engineering; particle bombardment	Genetic modification of conifers through gene transfer technology is now an important field in forest biotechnology. Two basic methodologies, particle bombardment and Agrobacterium-mediated transformation, have been used on conifers. The use of particle bombardment has produced stable transgenic plants in Picea abies, P. glauca, P. mariana, and Pinus radiata. Transgenic plants have been produced …	2003	22	1	http://dx.doi.org/10.1007/s00299-003-0670-1	WOS:000184778000001
127	J	Cremer, E; Liepelt, S; Sebastiani, F; Buonamici, A; Michalczyk, IM; Ziegenhagen, B; Vendramin, GG	Identification and characterization of nuclear microsatellite loci in <i>Abies alba</i> Mill.	MOLECULAR ECOLOGY NOTES	Article	Abies; cross-species amplification; SSR	Eleven polymorphic nuclear microsatellite markers for Abies alba Mill. were developed from an enriched genomic library. An average of 5.2 alleles per locus and a mean expected heterozygosity of 0.532 were found in a sample of 24 Abies alba individuals from different populations within Europe. These loci can be used in studies of genetic diversity for parentage analysis and for estimation of gene …	2006	6	2	http://dx.doi.org/10.1111/j.1471-8286.2005.01238.x	WOS:000237635900025
128	J	Wick, L; Möhl, A	The mid-Holocene extinction of silver fir (<i>Abies alba</i>) in the Southern Alps:: a consequence of forest fires?: Palaeobotanical records and forest simulations	VEGETATION HISTORY AND ARCHAEOBOTANY	Article	Northern Italy; Abies alba; pollen analysis; charcoal; fire history; dynamic forest model	Pollen records suggest that Abies alba played a dominating role in both the montane and lowland forests at the border of the Southern Alps between ca. 8500 and 5700 years ago. Two major declines in fir, at about 7300-7000 cal B.P. and at ca. 6000 cal B.P., followed by the local extinction of the species are characteristic of the area below ca. 1000 m a.s.l. In order to test the impact of fire on …	2006	15	4	http://dx.doi.org/10.1007/s00334-006-0051-0	WOS:000239958900018
130	J	Gömöry, D; Fabrika, M; Chudy, F; Paule, L	Development of genetic structures in a Norway spruce (<i>Picea abies</i> Karst.) population colonizing the abandoned agricultural land:: A look back and a look ahead	POLISH JOURNAL OF ECOLOGY	Article	colonization; spatial genetic structure; individual-tree model; Picea abies Karst	Changes in the genetic variation and spatial genetic structures were modelled in a Norway spruce (Picea abies Karst.) population colonizing abandoned pasture area of 100 hectares at the locality Prislopy, Pofana Mts. (Carpathians, Central Slovakia, 48 degrees 38'N, 19 degrees 25'E, approx. 900 in a.s.l.). The development in the past was reconstructed on the basis of a series of historical aerial …	2006	54	1		WOS:000236073300010
131	J	Ducci, F; De Rogatis, A; Proietti, R; Curtu, AL; Marchi, M; Benetti, P	Establishing a baseline to monitor future climate- change-effects on peripheral populations of<i> Abies alba</i> in central Apennines	ANNALS OF FOREST RESEARCH	Article	Abies alba; silver fir; genetic diversity; cambial phenology; marginal; peripheral populations; Apennines; isotherm shift	Understanding tree species responses to climate change is crucial for preserving biodiversity especially in Southern Europe hot spots where Abies alba is widely spread. Three Apennine silver fir populations, Pigelleto (PIG), La Verna (LV) and Bocca Trabaria (BT), ensured gene flows in interglacial periods between the two phylogenetically different groups of northern and southern Apennines. These …	2021	64	2	http://dx.doi.org/10.15287/afr.2021.2281	WOS:000739730700003
132	J	Batalova, AY; Putintseva, YA; Sadovsky, MG; Krutovsky, KV	Comparative Genomics of Seasonal Senescence in Forest Trees	INTERNATIONAL JOURNAL OF MOLECULAR SCIENCES	Article	Larix sibirica; seasonal leaf senescence; comparative genomics; forest trees	In the course of evolution, both flowering plants and some gymnosperms have developed such an adaptation to winter and unfavorable living conditions as deciduousness. Of particular interest is Siberian larch (Larix sibirica Ledeb.), which is the only species in the pine family (Pinaceae) with a seasonal deciduousness. New generation sequencing technologies make it possible to study this phenomeno…	2022	23	7	http://dx.doi.org/10.3390/ijms23073761	WOS:000781430600001
133	J	Schubert, R; Manteuffel, R; Eich, J; Häger, KP	Molecular characterization and evolution of the cytosolic class II 17.0 kDa small heat-shock protein gene family from <i>Picea abies</i> (L.) Karst	PLANT SCIENCE	Article	small heat-shock proteins; gene family evolution; intron-exon structure; conifer genomes; Picea abies	In order to investigate the pattern of small heat-shock protein (sHSP) expression in Norway spruce, seedlings were exposed to thermal stress. [35 S]methionine in vivo labelling revealed a set of eight predominant sHSPs with molecular weights ranging from 16.0 to 27.0 kDa, comprising a 17.0 kDa cytosolic class II sHSP which is already predicted from a previously cloned cDNA sequence (Forest Geneti…	2002	163	1	http://dx.doi.org/10.1016/S0168-9452(02)00027-4	WOS:000177499800001
134	J	Ranade, SS; García-Gil, MR; Rosselló, JA	Non-functional plastid <i>ndh</i> gene fragments are present in the nuclear genome of Norway spruce (<i>Picea abies</i> L. Karsch): insights from in silico analysis of nuclear and organellar genomes	MOLECULAR GENETICS AND GENOMICS	Article	ndh genes; Picea abies; Norway spruce gene transfer; Organellar genomes	Many genes have been lost from the prokaryote plastidial genome during the early events of endosymbiosis in eukaryotes. Some of them were definitively lost, but others were relocated and functionally integrated to the host nuclear genomes through serial events of gene transfer during plant evolution. In gymnosperms, plastid genome sequencing has revealed the loss of ndh genes from several species…	2016	291	2	http://dx.doi.org/10.1007/s00438-015-1159-7	WOS:000373157700031
135	J	Litkowiec, M; Lewandowski, A	Postglacial history of silver fir (<i>Abies alba</i> Mill.) in Poland as a result of migration from different refugia - the current state of knowledge	SYLWAN	Article	genetic variation; genetic conservation; Abies alba Mill.; postglacial history	The paper reviews the current knowledge about the genetic variation, glacial and postglacial history of Polish populations of silver fir (Abies alba Mill.). This species occurs in the mountainous forests of central and southern Europe, from the Pyrenees up to the Balkans, where it is important from both ecological and economical points of view. The current knowledge about glacial and postglacial …	2015	159	2		WOS:000353600300003
136	J	Celinski, K; Kijak, H; Barylski, J; Grabsztunowicz, M; Wojnicka-Potorak, A; Chudzinska, E	Characterization of the complete chloroplast genome of <i>Pinus uliginosa</i> (Neumann) from the <i>Pinus mugo</i> complex	CONSERVATION GENETICS RESOURCES	Article	Pinus uliginosa; Peat-bog pine; Chloroplast genome; Next-generation sequencing	Taxonomic status of endangered peat-bog pine, Pinus uliginosa (Neumann) classified within the Pinus mugo complex, still remains to be elucidated. Here we present a complete chloroplast genome of P. uliginosa, to aid resolve its complex systematical position. The total genome size was 119,877 bp in length and contained a total of 112 genes, including 73 protein-coding genes, 35 tRNAs, and four rRN…	2017	9	2	http://dx.doi.org/10.1007/s12686-016-0652-6	WOS:000401507200010
137	J	Silva, JCE; Wellendorf, H; Borralho, NMG	Prediction of breeding values and expected genetic gains in diameter growth, wood density and spiral grain from parental selection in <i>Picea abies</i> (L.) KARST.	SILVAE GENETICA	Article	Picea abies; open-pollination; controlled crosses; REML; BLUP; heritability; genetic correlation; genotype by environment interaction; genetic gain; sawn timber production	Parental breeding values were predicted for diameter growth, pilodyn penetration, basic density and spiral grain in Norway spruce (Picea abies (L.) KARST.). Cross- and open-pollinated progenies, tested across a range of sites, were evaluated under univariate and multivariate individual tree mixed models. Best Linear Unbiased Predictions (BLUP) of breeding values were obtained by linking data from…	2000	49	2		WOS:000089723100009
138	J	Swedjemark, G; Karlsson, B	Variation in incidence and genetic impact on natural infection of <i>Heterobasidion annosum</i> in <i>Picea abies</i> (L.) Karst. in genetic trials in south Sweden	FOREST ECOLOGY AND MANAGEMENT	Article	Norway spruce; Picea abies; Heterobasidion annosum; genetic variation; natural infection; variation	The incidence of natural infection of Heterobasidion annosum was recorded in two genetic trials at different sites. Site 1: In a 15-year-old clone trial with Norway spruce (Picea abies) planted on a second-generation spruce site the presence of H. annosum at stump height was investigated in two steps. Step 1: The incidence of H. annosum was detected on the stump surface of 48 clones (8-9 ramets o…	2004	203	45717	http://dx.doi.org/10.1016/j.foreco.2004.07.065	WOS:000225523000010
139	J	Seifert, T; Müller-Starck, G	Impacts of fructification on biomass production and correlated genetic effects in Norway spruce (<i>Picea abies</i> [L.] Karst.)	EUROPEAN JOURNAL OF FOREST RESEARCH	Article	Vegetative biomass; Generative biomass; Coning; Fructification; Trade-off; Logistic regression; Genotype; Allele; Norway spruce; Picea abies; Canopy crane experiment	For the period 2003-2006, fructification of Norway spruce (Picea abies [L.] Karst.) was recorded at the Kranzberg forest site in Southern Germany by employing a crane with access to the canopy of more than 266 trees. For each tree, stem diameter and growth parameters were assessed annually as well as biomass of cones and seeds, number of seeds per cone, and proportions of empty seeds for a total …	2009	128	2	http://dx.doi.org/10.1007/s10342-008-0219-5	WOS:000264944700009
140	J	Mudrik, EA; Polyakova, TA; Shatokhina, AV; Bondarenko, GN; Politov, DV	Spatial distribution of intron 2 of <i>nad1</i> gene haplotypes in populations of Norway and Siberian spruce (<i>Picea abies</i>-<i>P-obovata</i>) species complex	RUSSIAN JOURNAL OF GENETICS	Article	spruce; species complex Picea abies-P. obovata; intron 2 of the nad1 gene; haplotype variability; genetic differentiation	The length and sequence variations among intron 2 haplotypes of the mitochondrial nad1 gene have been studied in the Norway and Siberian spruce (Picea abies (L.) H. Karst.-P. obovata Ledeb.) species complex. Twenty-two native populations and 15 provenances were analyzed. The distribution of the northern European haplogroup (haplotypes 721, 755, 789, 823, 857, 891, and 925) is delimited in the eas…	2015	51	10	http://dx.doi.org/10.1134/S1022795415100129	WOS:000363256700003
141	J	Ravazzi, C	Late Quaternary history of spruce in southern Europe	REVIEW OF PALAEOBOTANY AND PALYNOLOGY	Review	southern Europe; plant migration; Quaternary refugia; genetic diversity; Picea abies	The late Quaternary history of fossil spruces in southern Europe (Picea abies (L.) Karsten and Picea omorika (Pancic) Purkyne) is based on 163 selected pollen, charcoal and macrofossil records. The timing of immigration of P. abies is estimated from data where the Picea curve passed the threshold value of 4%. P. abies occupied the southern European mountain ranges - excluding the Pyrenees - durin…	2002	120	45689	http://dx.doi.org/10.1016/S0034-6667(01)00149-X	WOS:000177824400009
142	J	Manka, P; Kormuták, A; Galgóci, M; Gömöry, D	Genetic status of the putative hybrid swarms of mountain dwarf pine and Scots pine in contact zones of their distribution in Slovakia	BIOLOGIA	Article	Pinus mugo; P. sylvestris; introgressive hybrids; isoenzymes	Genetic structure of the mountain dwarf pine (Pinus mugo) and Scots pine (P. sylvestris) natural populations along with their 4 putative hybrid swarms in Slovakia were analyzed using 12 enzyme loci. The study aimed in evaluation of postulated hybrid status of the swarms on molecular level. Based on semidiagnostic allele frequencies of the MDH B, MDH C, 6PGDH B, ADH 1 and F-EST loci in their megag…	2015	70	10	http://dx.doi.org/10.1515/biolog-2015-0153	WOS:000365800900005
143	J	Ocokoljic, M; Petrov, D; Galecic, N	Medial-vegetative proliferation of European larch Larix decidua Mill. cones	SYLWAN	Article	genotype; morphogenetic control; teratological phenomenon	Identification and analysis of proliferated cones in conifers has both theoretical and practical significance, particularly in systematic and taxonomic investigations, but also in the study of population and individual variability within a species. Comparative morphological-anatomical studies of reproductive organs can contribute to solving many issues in phylogeny and can iden- tify abnormal phe…	2022	166	9	http://dx.doi.org/10.26202/sylwan.2022069	WOS:000925875900001
144	J	Dzialuk, A; Boratynski, A; Boratynska, K; Burczyk, J	Geographic patterns of genetic diversity of <i>Pinus mugo</i> (Pinaceae) in Central European mountains	DENDROBIOLOGY	Article	Alps; Carpathians; Chloroplast microsatellites; Dwarf mountain pine; Genetic diversity; Giant Mountains; Isolation by distance; Phylogeography	The genetic diversity within and among twelve populations (379 individuals) of Pinus mugo from the Giant Mts., Carpathians and Alps was analyzed using ten chloroplast microsatellite markers. A stepwise mutation model (SMM) for microsatellite loci was used in order to estimate divergence between populations and provenances from three mountain ranges. High levels of genetic diversity and significan…	2012	68			WOS:000307644800004
145	J	Opgenoorth, L; Dauphin, B; Benavides, R; Heer, K; Alizoti, P; Martínez-Sancho, E; Alía, R; Ambrosio, O; Audrey, A; Auñón, F; Avanzi, C; Avramidou, E; Bagnoli, F; Barbas, E; Bastias, CC; Bastien, C; Ballesteros, E; Beffa, G; Bernier, F; Bignalet, H; Bodineau, G; Bouic, D; Brodbeck, S; Brunetto, W; Buchovska, J; Buy, M; Cabanillas-Saldaña, AM; Carvalho, B; Cheval, N; Climent, JM; Correard, M; Creme…	The GenTree Platform: growth traits and tree-level environmental data in 12 European forest tree species	GIGASCIENCE	Article; Data Paper	regeneration; DBH; height; crown size; bark thickness; fruit number; stem straightness; branch angle; forking index; soil depth	Background: Progress in the field of evolutionary forest ecology has been hampered by the huge challenge of phenotyping trees across their ranges in their natural environments, and the limitation in high-resolution environmental information. Findings: The GenTree Platform contains phenotypic and environmental data from 4,959 trees from 12 ecologically and economically important European forest tr…	2021	10	3	http://dx.doi.org/10.1093/gigascience/giab010	WOS:000637267600001
146	J	Azaiez, A; Pavy, N; Gérardi, S; Laroche, J; Boyle, B; Gagnon, F; Mottet, MJ; Beaulieu, J; Bousquet, J	A catalog of annotated high-confidence SNPs from exome capture and sequencing reveals highly polymorphic genes in Norway spruce (<i>Picea abies</i>)	BMC GENOMICS	Article	Conifer; Exome sequencing; Annotated gene SNPs; Illumina Infinium iSelect array; Illumina MiSeq; Picea abies; Single nucleotide polymorphism; SNP abundance	BackgroundNorway spruce [Picea abies (L.) Karst.] is ecologically and economically one of the most important conifer worldwide. Our main goal was to develop a large catalog of annotated high confidence gene SNPs that should sustain the development of genomic tools for the conservation of natural and domesticated genetic diversity resources, and hasten tree breeding efforts in this species.Results…	2018	19		http://dx.doi.org/10.1186/s12864-018-5247-z	WOS:000453529600001
147	J	Lewandowski, A; Burczyk, J	Allozyme variation of <i>Picea abies</i> in Poland	SCANDINAVIAN JOURNAL OF FOREST RESEARCH	Article	differentiation; genetic distance; genetic variation; isoenzyme; Norway spruce	The aim of this study was to determine the levels and patterns of allozyme variation among 29 populations of Norway spruce [Picea abies ( L.) Karst.] from Poland. Thirteen investigated isoenzyme systems were encoded by 27 gene loci and, on average, 71% of the loci per population were polymorphic. The average and effective numbers of alleles per locus were 2.17 and 1.26, respectively, while the ex…	2002	17	6	http://dx.doi.org/10.1080/02827580260417134	WOS:000180250600007
148	J	Teodosiu, M; Mihai, G; Ciocîrlan, E; Curtu, AL	Genetic Characterisation and Core Collection Construction of European Larch (<i>Larix decidua</i> Mill.) from Seed Orchards in Romania	FORESTS	Article	genetic structure; planted populations; native populations; germplasm	European larch (Larix decidua L.) is an important forest tree species, with a large range and genetic variability; however, little is known about the characterisation of its genetic structure and diversity based on molecular markers in seed orchards, and no core collection-an improved tool for managing germplasm-has been developed for this species to date. In the present study, we employed nSSR m…	2023	14	8	http://dx.doi.org/10.3390/f14081575	WOS:001055896500001
149	J	Popovic, V; Nikolic, B; Lucic, A; Rakonjac, L; Jovanovic, DS; Miljkovic, D	Morpho-anatomical trait variability of the Norway spruce (<i>Picea abies</i> (L.) Karst.) needles in natural populations along elevational diversity gradient	TREES-STRUCTURE AND FUNCTION	Article	Elevation gradient; Needle traits; Picea abies (L; ) Karst; Climatic factors; Environmental and genetical variation; Adaptation; Balkan Peninsula; Mountain regions	Key message Norway spruce needle trait variation in natural populations along elevational gradient (980-1860 m a.s.l.) was driven more by environmental than genetic factors. Humid habitats conditioned higher mean values of morpho-anatomical needle traits in relation to dry habitats. Geographical and climatic characteristics (elevation, mean annual temperature, summer heat: moisture index, evapora…	2022	36	3	http://dx.doi.org/10.1007/s00468-022-02277-1	WOS:000753709700001
150	J	Tollefsrud, MM; Latalowa, M; van der Knaap, WO; Brochmann, C; Sperisen, C	Late Quaternary history of North Eurasian Norway spruce (<i>Picea abies</i>) and Siberian spruce (<i>Picea obovata</i>) inferred from macrofossils, pollen and cytoplasmic DNA variation	JOURNAL OF BIOGEOGRAPHY	Article	DNA markers; fossil records; glacial refugia; introgression; Picea abies; Picea obovata; post-glacial colonization	AimWe used combined palaeobotanical and genetic data to assess whether Norway spruce (Picea abies) and Siberian spruce (Picea obovata), two major components of the Eurasian boreal forests, occupied separate glacial refugia, and to test previous hypotheses on their distinction, geographical delimitation and introgression. LocationThe range of Norway spruce in northern Europe and Siberian spruce in…	2015	42	8	http://dx.doi.org/10.1111/jbi.12484	WOS:000357899700007
151	J	Salzer, K; Sebastiani, F; Gugerli, F; Buonamici, A; Vendramin, GG	Isolation and characterization of polymorphic nuclear microsatellite loci in <i>Pinus cembra</i> L.	MOLECULAR ECOLOGY RESOURCES	Article	cross-species amplification; gene flow; nuclear microsatellites; Pinus	We developed eight polymorphic nuclear microsatellite markers for the Swiss stone pine (Pinus cembra L.), of which seven may be amplified in a multiplex polymerase chain reaction. Allelic polymorphism across all loci and 40 individuals representing two populations in the Swiss Alps was high (mean = 7.6 alleles). No significant linkage disequlibrium was displayed between pairs of loci. Significant…	2009	9	3	http://dx.doi.org/10.1111/j.1755-0998.2008.02396.x	WOS:000265897200045
152	J	Wojnicka-Póltorak, A; Celinski, K; Chudzinska, E; Prus-Glowacki, W; Niemtur, S	Genetic Resources of <i>Pinus cembra</i> L. Marginal Populations from the Tatra Mountains: Implications for Conservation	BIOCHEMICAL GENETICS	Article	Isolated populations; Genetic variability; Provenances; Families; Gene pool conservation	The levels of variation and genetic diversity of offspring of randomly selected old mother trees in four marginal populations of the Pinus cembra in the Tatra Mountains were analyzed. Twenty-four isozyme loci were analyzed (nine of them were monomorphic). The analyzed offspring of Swiss stone pine showed highly diverse polymorphism at the levels of both provenances and individual families (the of…	2015	53	45717	http://dx.doi.org/10.1007/s10528-015-9670-4	WOS:000354438300006
153	J	Fäldt, J; Martin, D; Miller, B; Rawat, S; Bohlmann, J	Traumatic resin defense in Norway spruce (<i>Picea abies</i>):: Methyl jasmonate-induced terpene synthase gene expression, and cDNA cloning and functional characterization of (+)-3-carene synthase	PLANT MOLECULAR BIOLOGY	Article	3-carene; chemical plant defense; conifer biotechnology; methyl jasmonate; monoterpene synthase; Picea abies (Norway spruce)	Picea abies (L.) Karst. (Norway spruce) employs constitutive and induced resin terpenoids as major chemical and physical defense-shields against insects and pathogens. In recent work, we showed that a suite of terpenoids, monoterpenoids and diterpenoids was induced in stems of Norway spruce after treatment of trees with methyl jasmonate (MeJA) (Martin et al., 2002). Increase of enzyme activities …	2003	51	1	http://dx.doi.org/10.1023/A:1020714403780	WOS:000178667200011
154	J	Schiop, ST; Al Hassan, M; Sestras, AF; Boscaiu, M; Sestras, RE; Vicente, O	Identification of Salt Stress Biomarkers in Romanian Carpathian Populations of <i>Picea abies</i> (L.) Karst.	PLOS ONE	Article		The Norway spruce (Picea abies), the most important tree species in European forests, is relatively sensitive to salt and does not grow in natural saline environments. Yet many trees are actually exposed to salt stress due to the common practice of de-icing of mountain roads in winter, using large amounts of NaCl. To help develop strategies for an appropriate use of reproductive seed material on …	2015	10	8	http://dx.doi.org/10.1371/journal.pone.0135419	WOS:000360018600049
155	J	Oreshkova, NV; Putintseva, YA; Sharov, VV; Kuzmin, DA; Krutovsky, KV	Development of Microsatellite Genetic Markers in Siberian Larch (&ITLarix sibirica&IT Ledeb.) Based on the &ITde novo &ITWhole Genome Sequencing	RUSSIAN JOURNAL OF GENETICS	Article	genetic diversity; genome; heterozygosity; Siberian larch; microsatellite markers; NGS; whole genome sequencing; Larix sibirica	This special issue of the journal is devoted to the outstanding population geneticist Yuri Petrovich Altukhov, who paid much attention in his research to the development of molecular genetic markers for population studies. Over the past time markers and methods of their development have undergone significant change. Thanks to modem methods of whole genome sequencing, it has become possible to dev…	2017	53	11	http://dx.doi.org/10.1134/S1022795417110096	WOS:000416136700004
156	J	Nikolic, BM; Ballian, D; Mitic, ZS	Autochthonous Conifers of Family Pinaceae in Europe: Broad Review of Morpho-Anatomical and Phytochemical Properties of Needles and Genetic Investigations	FORESTS	Review	Europe; Pinaceae; conifers; needle morphology; needle anatomy; terpenes; n-alkanes; genetic markers	Gymnosperms are a very old and small group of plants compared to angiosperms. Contemporary science recognizes about 650 extant conifers worldwide. This review focuses on species of the Pinaceae family found in Europe. There are 23 species from the genera Abies, Larix, Picea, and Pinus. Some of them are widespread in Europe, but others have fragmented and limited distribution and are classified as…	2024	15	6	http://dx.doi.org/10.3390/f15060989	WOS:001257132200001
157	J	Artyukhin, A; Sharifyanova, Y; Krivosheev, MM; Mikhaylova, EV	Larches of Kuzhanovo Have a Unique Mutation in the <i>atpF-atpH</i> Intergenic Spacer	INTERNATIONAL JOURNAL OF MOLECULAR SCIENCES	Article	Larix sibirica; Larix sukaczewii; polymorphism; atpF-atpH; rpoC1; ploidy	The larches of Kuzhanovo (Larix sibirica Ledeb.) are protected trees with a round crown growing in the Southern Urals. In 2020 vandals sawed the sapwood of these trees, which exposed the problem of insufficient conservation measures. Their origin and genetic characteristics have been of particular interest to breeders and scientists. The larches of Kuzhanovo were screened for polymorphisms using …	2023	24	4	http://dx.doi.org/10.3390/ijms24043939	WOS:000938700500001
158	J	Akhter, S; Kretzschmar, WW; Nordal, V; Delhomme, N; Street, NR; Nilsson, O; Emanuelsson, O; Sundström, JF	Integrative Analysis of Three RNA Sequencing Methods Identifies Mutually Exclusive Exons of MADS-Box Isoforms During Early Bud Development in <i>Picea abies</i>	FRONTIERS IN PLANT SCIENCE	Article	Picea abies; MADS-box genes; cone development; De Bruijn assembly; transcript isoforms; RNA sequencing; DAL19	Recent efforts to sequence the genomes and transcriptomes of several gymnosperm species have revealed an increased complexity in certain gene families in gymnosperms as compared to angiosperms. One example of this is the gymnosperm sister Glade to angiosperm TM3-like MADS-box genes, which at least in the conifer lineage has expanded in number of genes. We have previously identified a member of th…	2018	9		http://dx.doi.org/10.3389/fpls.2018.01625	WOS:000449948700001
159	J	Wehenkel, C; Corral-Rivas, JJ; Castellanos-Bocaz, HA	Is there selection by species diversity in Picea abies L.?	PLANT ECOLOGY	Article	Covariation; Community genetics; Genetic differentiation; Permutation test; AFLP	In view of the progressive destruction of the biosphere, biodiversity research plays an important role in the search for factors affecting species diversity and in the analysis of the effects of species diversity on ecosystems. However, research into how species diversity and composition are related to genetic structures is still at the beginning. In this study, we combined population genomics, n…	2010	208	1	http://dx.doi.org/10.1007/s11258-009-9685-1	WOS:000277182000004
160	J	Wagner, S; Litt, T; Sánchez-Goñi, MF; Petit, RJ	History of <i>Larix</i> <i>decidua</i> Mill. (European larch) since 130 ka	QUATERNARY SCIENCE REVIEWS	Article	Fossil compilation; Genetics; Last interglacial-glacial cycle; Range-wide; Refuges; European larch	Retrospective studies focussing on forest dynamics using fossil and genetic data can provide important keys to prepare forests for the future. In this study we analyse the impact of past climate and anthropogenic changes on Larix decidua Mill. (European larch) populations based on a new range-wide fossil compilation encompassing the last 130 ka and on recently produced genetic data (nuclear, mito…	2015	124		http://dx.doi.org/10.1016/j.quascirev.2015.07.002	WOS:000361258000012
161	J	Bishop-Hurley, SL; Zabkiewicz, RJ; Grace, L; Gardner, RC; Wagner, A; Walter, C	Conifer genetic engineering:: transgenic <i>Pinus</i> <i>radiata</i> (D. Don) and <i>Picea abies</i> (Karst) plants are resistant to the herbicide Buster	PLANT CELL REPORTS	Article	herbicide resistance; biolistic transformation; co-transformation; conifers	A biolistic transformation procedure was applied to co-transform embryogenic tissue of Pinus radiata and Picea abies with two plasmid DNAs. The first vector contained the bar gene, specifying resistance to the herbicide glufosinate, under the control of the maize ubiquitin promoter. This plasmid also contained the Pinus radiata germin cDNA sequence, in either sense or antisense orientation, drive…	2001	20	3	http://dx.doi.org/10.1007/s002990100317	WOS:000168110200010
164	J	Belokon, MM; Belokon, YS; Petrova, EA; Vasilyeva, GV; Efimova, AP; Zakharov, ES; Goroshkevich, SN; Politov, DV	Ancient and Modern Hybridization of Siberian Stone Pine and Dwarf Siberian Pine in the South of Yakutia	RUSSIAN JOURNAL OF GENETICS	Article	Siberian stone pine; Pinus sibirica; dwarf Siberian pine; Pinus pumila; hybridization; introgression; allozymes; nad1 intron 2	The hybridization zone on the northern border of the overlapping ranges at the junction of the Prilensky Plateau with the Stanovoy and Aldan highlands is studied using the analysis of the genotypes of adult plants of dwarf Siberian pine, Pinus pumila (Pall.) Regel, and Siberian stone pine, Pinus sibirica Du Tour, based on allozyme (nuclear codominant markers with biparental inheritance) and mtDNA…	2022	58	11	http://dx.doi.org/10.1134/S1022795422110023	WOS:000881720100002
165	J	Belletti, P; Ferrazzini, D; Ducci, F; De Rogatis, A; Mucciarelli, M	Genetic diversity of Italian populations of <i>Abies alba</i>	DENDROBIOLOGY	Article	Silver fir; genetic differentiation; glacial refugia; regions of provenance; SSR markers	Silver fir (Abies alba) is a common tree species in the mountainous areas in Europe. A number of natural stands in the hilly regions of northern Europe represent relic populations. The aim of the research was to evaluate the diversity present in Italian populations of the species. Genetic diversity was assessed in 45 silver fir populations covering the species' distribution range in Italy, based …	2017	77		http://dx.doi.org/10.12657/denbio.077.012	WOS:000399732900012
166	J	Putintseva, YA; Bondar, EI; Simonov, EP; Sharov, VV; Oreshkova, NV; Kuzmin, DA; Konstantinov, YM; Shmakov, VN; Belkov, VI; Sadovsky, MG; Keech, O; Krutovsky, KV	Siberian larch (<i>Larix sibirica</i> Ledeb.) mitochondrial genome assembled using both short and long nucleotide sequence reads is currently the largest known mitogenome	BMC GENOMICS	Article	Larix sibirica; Long reads; Mitochondrial genome; mtDNA; Nucleotide sequence; RNA editing	Background: Plant mitochondrial genomes (mitogenomes) can be structurally complex while their size can vary from similar to 222 Kbp inBrassica napusto 11.3 Mbp inSilene conica. To date, in comparison with the number of plant species, only a few plant mitogenomes have been sequenced and released, particularly for conifers (the Pinaceae family). Conifers cover an ancient group of land plants that i…	2020	21	1	http://dx.doi.org/10.1186/s12864-020-07061-4	WOS:000576214200001
167	J	Moriguchi, Y; Prescher, F; Lindgren, D	Optimum lifetime for Swedish <i>Picea abies</i> seed orchards	NEW FORESTS	Article	Norway spruce; genetic gain; seed orchard optimization; economics; breeding and production populations	The optimum lifetime of Picea abies seed orchards in Sweden was calculated using a model which considers changes in seed yield over time, annual progress of genetic gain, establishment, management and seed costs, and both the monetary and genetic value of the seeds produced. The longer the seed orchard is active, the more genetically outdated the produced seeds will become, and thus their value w…	2008	35	2	http://dx.doi.org/10.1007/s11056-007-9068-1	WOS:000252770100004
168	J	Sonnenwyl, V; Dauphin, B; Fragniere, Y; Clement, B; Gruenig, S; Brodbeck, S; Parisod, C; Kozlowski, G; Gugerli, F	Genetic underpinning of historical afforestation with allochthonous <i>Pinus cembra</i> in the northwestern Swiss Alps	ALPINE BOTANY	Article	Assignment test; Forest reproductive material; Genetic diversity; Nuclear markers; Swiss stone pine; Translocation	Throughout the last centuries, the structure and genetic composition of forests have been strongly affected by forest management. Over 30% of European forests are artificially regenerated, very often using translocated forest reproductive material, among these species the Swiss stone pine (Pinus cembra L.). In the late nineteenth and early twentieth centuries, the species was largely used for art…	2024	134	1	http://dx.doi.org/10.1007/s00035-023-00304-6	WOS:001127179900001
169	J	Oreshkova, NV; Bondar, EI; Putintseva, YA; Sharov, VV; Kuzmin, DA; Krutovsky, KV	Development of Nuclear Microsatellite Markers with Long (Tri-, Tetra-, Penta-, and Hexanucleotide) Motifs for Three Larch Species Based on the de novo Whole Genome Sequencing of Siberian Larch (Larix sibirica Ledeb.)	RUSSIAN JOURNAL OF GENETICS	Article	conifers; genetic diversity; heterozygosity; Larix; larch; microsatellite markers; SSR; whole genome sequencing	Siberian larch (Larix sibirica Ledeb.) is one of the major boreal tree species in Eurasia and has a considerable economic and ecological value. Despite that importance, the development and use of microsatellite markers in this species remain limited. Microsatellite markers are considered to be a valuable tool for estimation of population diversity and structure. Availability of a draft reference …	2019	55	4	http://dx.doi.org/10.1134/S1022795419040094	WOS:000469508900006
170	J	Scheepers, D; Eloy, MC; Briquet, M	Identification of larch species (<i>Larix decidua</i>, <i>Larix kaempferi</i> and <i>Larix X eurolepis</i>) and estimation of hybrid fraction in seed lots by RABD fingerprints	THEORETICAL AND APPLIED GENETICS	Article	species-specific markers; PCR; hybrid; conifers	Species-specific RAPD markers were used to identify the different larch species (Larix decidua and Larix kaempferi) and their interspecific hybrid (Larix X eurolepis). Although morphological differences between pure species and the hybrids exist, differentiation is not always possible, especially at an early stage (seed or plantlet). Eleven RAPD markers differentiated the two larch species, and 4…	2000	100	1	http://dx.doi.org/10.1007/s001220050010	WOS:000084693200010
171	J	Pluess, AR	Pursuing glacier retreat: genetic structure of a rapidly expanding <i>Larix decidua</i> population	MOLECULAR ECOLOGY	Article	climate warming; founder effects; glacier foreland; range expansion; spatial genetic structure; succession	One of the greatest threats to the long-term viability of migrating plant species is the loss of genetic diversity due to founder effects. Populations can expand as a response to climate change, but it is uncertain if long-lived plant species can maintain sufficient genetic diversity at the leading edge of migrating populations. This study uses an expanding Larix decidua population investigated a…	2011	20	3	http://dx.doi.org/10.1111/j.1365-294X.2010.04972.x	WOS:000286254700004
174	J	Hannrup, B; Cahalan, C; Chantre, G; Grabner, M; Karlsson, B; Le Bayon, I; Jones, GL; Müller, U; Pereira, H; Rodrigues, JC; Rosner, S; Rozenberg, P; Wilhelmsson, L; Wimmer, R	Genetic parameters of growth and wood quality traits in <i>Picea abies</i>	SCANDINAVIAN JOURNAL OF FOREST RESEARCH	Article	Genetic Correlation; heritability; lignin; pulp yield; spiral grain; tracheid dimensions; wood density	Genetic parameters were estimated for wood and growth traits in two 19-yr-old clonal trials and a 40-yr-old full-sib progeny trial of Norway spruce [ Picea abies ( L.) Karst.]. In the clonal trials high (> 0.4) broad-sense heritabilities were found for wood density traits, lignin content, number of internal cracks, growth traits, spiral grain and number of resin canals. Moderate (0.2-0.4) heritab…	2004	19	1	http://dx.doi.org/10.1080/02827580310019536	WOS:000188720200002
175	J	Sheller, M; Tóth, EG; Mikhaylov, P; Kulakov, S; Kulakova, N; Shilkina, E; Ibe, A; Sukhikh, T; Blanc-Jolivet, C	Genetic diversity and structure of Siberian Stone Pine (<i>Pinus sibirica</i> Du Tour) populations	SILVAE GENETICA	Article	Siberian stone pine; nuclear microsatellite markers (nSSR); genetic diversity; genetic structure; Siberia	Siberian stone pine (Pinus sibirica Du Tour) is a key component of the Eurasian boreal forest ecosystems. However, due to the ongoing climatic changes and anthropogenic activities, the habitats of the species are constantly degrading and reducing. To these reasons, exploring the genetic resources of the species and determining the genetic diversity and structure of today's populations is essentia…	2023	72	1	http://dx.doi.org/10.2478/sg-2023-0003	WOS:000973021600001
176	J	Ballian, D; Hodzic, MM	Analysis of Qualitative Indicators of Norway Spruce and Silver Fir Seed Stands in the Federation of Bosnia and Herzegovina	SEEFOR-SOUTH-EAST EUROPEAN FORESTRY	Article	Seed stand; Abies alba; Picea abies; qualitative structure	The research aims to determine the quantity and quality of Norway spruce and silver fir seed stands in the Federation of Bosnia and Herzegovina and to recommend measures for their improvement to produce the highest quality reproduction material and achieve genetic gain in newly planted forests. For this research, four measured and 19 observed phenotypic traits were analyzed in 11 Norway spruce an…	2024	15	2	http://dx.doi.org/10.15177/seefor.24-13	WOS:001388528800001
178	J	Heer, K; Ullrich, KK; Liepelt, S; Rensing, SA; Zhou, JB; Ziegenhagen, B; Opgenoorth, L	Detection of SNPs based on transcriptome sequencing in Norway spruce (<i>Picea abies</i> (L.) Karst)	CONSERVATION GENETICS RESOURCES	Article	RNA-seq; Single nucleotide polymorphism; Norway spruce; Genotyping	A novel set of SNPs was derived from transcriptome data of ten Norway spruce (Picea abies) trees from the Bavarian Forest National Park in Germany (BaFoNP). SNPs were identified by mapping against a de-novo transcriptome assembly and against pre-mRNAs of predicted genes of the reference genome assembly. This resulted in 111,849 and 366,577 SNPs, respectively. Out of these, 311 were either randoml…	2016	8	2	http://dx.doi.org/10.1007/s12686-016-0520-4	WOS:000378531000004
179	J	Mari, S; Jansson, G; Jonsson, A	Genetic variation in nutrient utilization and growth traits in <i>Picea abies</i> seedlings	SCANDINAVIAN JOURNAL OF FOREST RESEARCH	Article	biomass allocation; genetic correlations; growth chamber; Norway spruce; open pollinated families	Genetic variation in nitrogen (N) and phosphorus (P) utilization (amount of total biomass produced per unit nutrient in the needles) and growth traits in seedlings from 30 open-pollinated families of Picea abies (L.) Karst. was estimated. Seedlings were grown under two nutrient regimens: free access to nutrients and restricted access. There was a strong treatment effect on most growth traits. Wit…	2003	18	1	http://dx.doi.org/10.1080/02827581.2003.10383134	WOS:000182535800010
180	J	Bogunic, F; Siljak-Yakovlev, S; Muratovic, E; Pustahija, F; Medjedovic, S	Molecular cytogenetics and flow cytometry reveal conserved genome organization in <i>Pinus mugo</i> and <i>P-uncinata</i>	ANNALS OF FOREST SCIENCE	Article		Introduction The most common representatives of the European mountain pine complex (Pinus mugo s.l.) are P. mugo s.s. and Pinus uncinata. Materials and methods Genome characterization of P. mugo and P. uncinata was studied using fluorescence in situ hybridization of 5S and 18-5.8-26S rDNA, fluorochrome banding for heterochromatin characterization, and flow cytometry for DNA content measurement. R…	2011	68	1	http://dx.doi.org/10.1007/s13595-011-0019-9	WOS:000290447600019
181	J	Zukowska, WB; Wachowiak, W	Nuclear microsatellite markers reveal the low genetic structure of <i>Pinus mugo</i> Turra (dwarf mountain pine) populations in Europe	PLANT SYSTEMATICS AND EVOLUTION	Article	Adaptation; Conservation genetics; Genetic diversity; Phylogeography; Population differentiation; Postglacial recolonization	Twenty-one populations (555 individuals) covering the entire native range of Pinus mugo Turra (dwarf mountain pine) were investigated for genetic variation scored at 13 nuclear microsatellite markers (nSSRs). The main objective of the present study was to determine the genetic structure across the present distribution of the species and locate populations of different genetic compositions. Most o…	2017	303	5	http://dx.doi.org/10.1007/s00606-017-1395-x	WOS:000399699400006
182	J	Schueler, S; George, JP; Karanitsch-Ackerl, S; Mayer, K; Klumpp, RT; Grabner, M	Evolvability of Drought Response in Four Native and Non-native Conifers: Opportunities for Forest and Genetic Resource Management in Europe	FRONTIERS IN PLANT SCIENCE	Article	Picea abies; Abies alba; Larix decidua; Pseudotsuga menziesii; coefficient of additive genetic variation; repeatability; assisted migration and gene flow; tree breeding and improvement	Intraspecific genetic variation in drought response is expected to play an important role in determining the persistence of tree populations in global change as it (1) allows for spontaneous selection and local adaptation of tree populations, (2) supports assisted seed transfer of less-drought-sensitive provenance, and (3) enables the integration of drought-sensitivity traits into tree breeding. …	2021	12		http://dx.doi.org/10.3389/fpls.2021.648312	WOS:000675501900001
183	J	Korshikov, II; Pirko, NN; Pirko, YV	Genetic variation and differentiation of <i>Abies alba</i> Mill.: Populations from Ukrainian carpathians	RUSSIAN JOURNAL OF GENETICS	Article		Using electrophoretic analysis of I I enzyme systems, we studied the genetic structure and differentiation of eight natural populations of silver fir Abies alba Mill. in the Ukrainian Carpathians. Of 24 isozyme loci identified, 66.8% proved to be polymorphic. The mean numbers of alleles and genotypes per locus in the populations were respectively 3.1 and 4.5. Each A. alba tree was on average hete…	2005	41	3	http://dx.doi.org/10.1007/s11177-005-0085-x	WOS:000228452600010
184	J	Chmura, DJ; Matras, J; Barzdajn, W; Buraczyk, W; Kowal-Kowski, W; Kowalczyk, J; Rozkowski, R; Szeligowski, H	Variation in growth of Norway spruce in the IUFRO 1972 provenance experimental series	SILVAE GENETICA	Article	survival; Picea abies; population; productivity	Provenance experiments traditionally provide information on genetic variation within tree species in adaptation ability and other traits important for commercial forestry. In this study we investigated variation in growth among 20 populations of Norway spruce (Picea abies (L.) H. Karst) at four common-garden sites of the IUFRO 1972 provenance experimental series at the age close to half of rotati…	2018	67	1	http://dx.doi.org/10.2478/sg-2018-0004	WOS:000443493000001
185	J	Gramazio, P; Plesa, IM; Truta, AM; Sestras, AF; Vilanova, S; Plazas, M; Vicente, O; Boscaiu, M; Prohens, J; Sestras, RE	Highly informative SSR genotyping reveals large genetic diversity and limited differentiation in European larch (<i>Larix decidua</i>) populations from Romania	TURKISH JOURNAL OF AGRICULTURE AND FORESTRY	Article	Analysis of molecular variance; heterozygosity; genetic diversity; Larix; SSR markers	European larch (Larix decidua) is naturally distributed at high elevations in Central Europe. Romanian populations of L decidua are scattered in different areas of the country. In this study, we used 12 highly informative genomic simple sequence repeat (SSR) markers for genotyping seven populations from different areas of Romania. The SSR markers were highly variable, with up to 11 alleles per SS…	2018	42	3	http://dx.doi.org/10.3906/tar-1801-41	WOS:000433482500003
186	J	Slavov, GT; Zhelev, P	Allozyme variation, differentiation, and inbreeding in populations of <i>Pinus mugo</i> in Bulgaria	CANADIAN JOURNAL OF FOREST RESEARCH	Article		Genetic variation of 17 populations of Pinus mugo Turra was studied using 10 polymorphic allozyme loci. Polymorphism and gene diversity in these populations were comparable to mean values for gymnosperm species, but slightly lower than in pines with large and continuous ranges. We did not find significant interpopulation differentiation (F-ST = 0.041) or isolation by distance, suggesting that gen…	2004	34	12	http://dx.doi.org/10.1139/X04-127	WOS:000226595800020
187	J	Gabarayeva, NI; Grigorjeva, VV	Self-assembly as the underlying mechanism for exine development in <i>Larix decidua</i> D. C.	PLANTA	Article	Sporoderm ontogeny; Pattern formation; Micelles; Modeling	Main conclusion Our findings suggest a new approach to pollen ontogenetic investigations, entailing consideration of physical factors, which enable a better understanding of exine developmental processes. The sporopollenin-containing part of the pollen wall-the exine-is one of the most complex cell walls in plants. By tracing each stage of microspore development in Larix decidua with TEM, we aime…	2017	246	3	http://dx.doi.org/10.1007/s00425-017-2702-z	WOS:000407961500009
188	J	Dauphin, B; Wuest, RO; Brodbeck, S; Zoller, S; Fischer, MC; Holderegger, R; Gugerli, F; Rellstab, C	Disentangling the effects of geographic peripherality and habitat suitability on neutral and adaptive genetic variation in Swiss stone pine	MOLECULAR ECOLOGY	Article	conifers; exome capture; gene diversity; geographic peripherality; habitat suitability; Pinus cembra	It is generally accepted that the spatial distribution of neutral genetic diversity within a species' native range mostly depends on effective population size, demographic history, and geographic position. However, it is unclear how genetic diversity at adaptive loci correlates with geographic peripherality or with habitat suitability within the ecological niche. Using exome-wide genomic data and…	2020	29	11	http://dx.doi.org/10.1111/mec.15467	WOS:000543235900005
189	J	Karlsson, B; Mari, S; Eriksson, G	Juvenile-mature genetic correlations in <i>Picea abies</i> (L.) Karst. under different nutrient and mycorrhiza regimes	SILVAE GENETICA	Article	Picea abies; growth chamber; mycorrhiza; genetic correlations; field trials	Genetic correlations and selection efficiency estimates were used to study the possibilities of early selection based on growth chamber performance. Results from two experiments with 30 open-pollinated families from a Swedish Norway spruce seed orchard grown in growth chambers were compared with field performance of 24-year old progenies from the same seed orchard. One of the two growth chamber e…	2002	51	4		WOS:000179656600007
190	J	Novikova, SV; Oreshkova, NV; Sharov, VV; Zhirnova, DF; Belokopytova, LV; Babushkina, EA; Krutovsky, KV	Study of the Genetic Adaptation Mechanisms of Siberian Larch (<i>Larix sibirica</i> Ledeb.) Regarding Climatic Stresses Based on Dendrogenomic Analysis	FORESTS	Article	adaptation; climate change; ddRADseq; dendrophenotypes; drought; Larix sibirica Ledeb.; Siberian larch; SNPs; tree growth	Dendrogenomics is a new interdisciplinary approach that allows joint analysis of dendrological and genomic data and opens up new ways to study the temporal dynamics of forest treelines, delineate spatial and temporal population structures, decipher individual tree responses to abiotic and biotic stresses, and evaluate the adaptive genetic potential of forest tree populations. These data are neede…	2023	14	12	http://dx.doi.org/10.3390/f14122358	WOS:001132824500001
191	J	Dzialuk, A; Boratynska, K; Romo, A; Boratynski, A	Taxonomic and geographic variation of the <i>Pinus mugo</i> complex on chloroplast microsatellite markers	SYSTEMATICS AND BIODIVERSITY	Article	biogeography; Coniferae; genetic structure; mountain plants; phylogeography; Pinaceae; systematics	The high mountain plants of Central and Southern Europe survived the glacial periods in the same mountain ridges, but at lower altitudes and possibly covering larger areas than during interglacials. This implies a high level of species differentiation between isolated mountain ridges. Pinus mugo complex, which includes P. mugo s.s. (Alps, Sudetes, Carpathians, Dynaric Alps, and Rhodopes), P. unci…	2017	15	5	http://dx.doi.org/10.1080/14772000.2016.1257518	WOS:000405226800009
192	J	Zöller, T; Skroppa, T; Johnsen, O; Polle, A	Apoplastic Peroxidases in needles of Norway spruce (<i>Picea abies</i>) progenies from different crossing environments	FORSTWISSENSCHAFTLICHES CENTRALBLATT	Article	apoplastic peroxidase; environment; genomic imprinting; Norway spruce (Picea abies)	Apoplastic peroxidases (POD) are thought to play important roles in the plant's defence system against stress. To find out whether apoplastic POD activities were affected by imprinting through the maternal reproductive environment, by the current environmental conditions or mainly by inherited genetic features, two families of Norway spruce (both grown for almost one decade at the same field site…	2003	122	3	http://dx.doi.org/10.1046/j.1439-0337.2003.00153.x	WOS:000184270800001
193	J	Belokon, MM; Politov, DV; Mudrik, EA; Polyakova, TA; Shatokhina, AV; Belokon, YS; Oreshkova, NV; Putintseva, YA; Sharov, VV; Kuzmin, DA; Krutovsky, KV	Development of Microsatellite Genetic Markers in Siberian Stone Pine (<i>Pinus sibirica</i> Du Tour) Based on the <i>de novo</i> Whole Genome Sequencing	RUSSIAN JOURNAL OF GENETICS	Article	genome; microsatellite markers; whole genome sequencing; Siberian stone pine; genetic diversity; heterozygosity; NGS	Siberian stone pine, Pinus sibirica Du Tour is one of the most economically and environmentally important forest-forming species of conifers in Russia. To study these forests a large number of highly polymorphic molecular genetic markers, such as microsatellite loci, are required. Prior to the new high-throughput next generation sequencing (NGS) methods, discovery of microsatellite loci and devel…	2016	52	12	http://dx.doi.org/10.1134/S1022795416120036	WOS:000390578600005
194	J	Makarova, EN; Shakhmatov, EG; Belyy, VA	Seasonal dynamics of polysaccharides in Norway spruce (<i>Picea abies</i>)	CARBOHYDRATE POLYMERS	Article	Picea abies; Abies sibirica; Pectic polysaccharides; Arabinogalactan; Arabinogalactan protein; Coniferous tree greenery	Annual dynamics of accumulation and changes in the monosaccharide composition of pectin-, arabinan- and galactan-containing polysaccharides and binding glycans isolated from greenery (thin branches with needles) of Norway spruce were investigated in this study. The polysaccharides were compared with polysaccharides of Siberian fir according to the yields, composition and content of typical compon…	2017	157		http://dx.doi.org/10.1016/j.carbpol.2016.10.035	WOS:000391896800078
195	J	Besnard, G; Acheré, V; Jeandroz, S; Johnsen, O; Rampant, PF; Baumann, R; Mueller-Starck, G; Skroppa, T; Favre, JM	Does maternal environmental condition during reproductive development induce genotypic selection in <i>Picea abies</i> ?	ANNALS OF FOREST SCIENCE	Article	adaptability; segregation distortion; parental effect; Picea abies; post-zygotic selection	In forest trees, environmental conditions during reproduction can greatly influence progeny performance. This phenomenon probably results from adaptive phenotypic plasticity but also may be associated with genotypic selection. In order to determine whether selective effects during the reproduction are environment specific, single pair-crosses of Norway spruce were studied in two contrasted matern…	2008	65	1	http://dx.doi.org/10.1051/forest:2007081	WOS:000253502900009
196	J	Steffenrem, A; Kvaalen, H; Hoibo, OA; Edvardsen, OM; Skroppa, T	Genetic variation of wood quality traits and relationships with growth in Picea abies	SCANDINAVIAN JOURNAL OF FOREST RESEARCH	Article	Genetic correlations; genetic variation; growth traits; Norway spruce; tree breeding; wood quality	Genetic parameters were estimated for wood density and spiral grain in two long-term field trials with families of Picea abies (L.) Karst., and for microfibril angle (MfA) and model-predicted wood stiffness (MOEest) at one of the sites. The trials were located at 600-720 m altitude in Norway and the progenies, which were a sample of 13 half-sib families from plus-trees in a breeding population, w…	2009	24	1	http://dx.doi.org/10.1080/02827580802641215	WOS:000263874400004
197	J	Marozau, A; Kotszan, U; Nowakowska, J; Berezovska, D; Moser, WK; Hsiang, T; Oszako, T	The Influence of the Provenance and Spatial Structure on the Growth of European Silver Fir (<i>Abies alba</i> Mill.) of Autochthonous Origin in a Forest Plantation in the Bialowieza Forest	FORESTS	Article	Bialowieza Forest; autochthonous silver fir; half-sib plantation; placement of trees; DBH	Currently, a change in the species composition of the Biaiowieza Forest, eastern Poland, is occurring. Parallel to the dying of spruce (Picea abies L. Karst.), caused by Ips typographus (L.), there is a spread of deciduous tree species, among which hornbeam (Carpinus betulus L.) is the most active. Against the background of climate change, it is of interest to consider the possibility of reintrod…	2022	13	6	http://dx.doi.org/10.3390/f13060831	WOS:000817370700001
198	C	Ziegenhagen, B; Degen, B; Petit, RJ; Anzidei, M; Madaghiele, A; Scholz, F; Vendramin, GG	Highly polymorphic uniparentally inherited DNA markers for spatial genetic analysis of silver fir (<i>Abies alba</i> Mill.) populations	GENETIC RESPONSE OF FOREST SYSTEMS TO CHANGING ENVIRONMENTAL CONDITIONS	Proceedings Paper	conifers; silver fir; biodiversity; conservation; chloroplast microsatellites; spatial genetic diversity; paternity	The present study is a summary on the development and inheritance analysis and application of chloroplast microsatellite markers in spatial genetic analysis of the conifer species silver fir (Abies alba Mill.). It aims at discussing and concluding the indicative value of these uniparentally paternally inherited markers in biodiversity and conservation studies at two different spatial scales. When…	2001	70			WOS:000175261600012
199	J	Petrova, EA; Zhuk, EA; Popov, AG; Bondar, AA; Belokon, MM; Goroshkevich, SN; Vasilyeva, GV	Asymmetric introgression between <i>Pinus</i> <i>sibirica</i> and <i>Pinus</i> <i>pumila</i> in the Aldan plateau (Eastern Siberia)	SILVAE GENETICA	Article	gene flow; hybridization; introgression; gymnosperms; chloroplast DNA; mitochondrial DNA	Pinus sibirica and P. pumila are Asian five-needle pines with vast geographic distributions that are partially overlapping. Natural hybrids with intermediate morphology have been found previously, but there is a lack of evidence of ongoing introgression. The goal of our study was to elucidate the genetic structure of P. sibirica and P. pumila populations growing in the north-east of their sympatr…	2018	67	1	http://dx.doi.org/10.2478/sg-2018-0009	WOS:000443493000006
200	J	Scotti, I; Paglia, GP; Magni, F; Morgante, M	Efficient development of dinucleotide microsatellite markers in Norway spruce (<i>Picea abies</i> Karst.) through dot-blot selection	THEORETICAL AND APPLIED GENETICS	Article	SSR; Picea abies; dot-blot; molecular markers; enrichment	The development of microsatellite markers can be a time-consuming process, especially in species such as conifers where many microsatellites have been shown to be associated with the repetitive fraction of the genome and to produce complex banding patterns following electrophoresis. Therefore, procedures to eliminate this fraction from further processing are sought. In this paper, we report on th…	2002	104	45844	http://dx.doi.org/10.1007/s00122-001-0843-7	WOS:000176083200016
201	J	Sannikov, SN; Tantsyrev, NV; Petrova, IV	Invasion of Siberian Pine Populations in Mountain Tundra in the Northern Urals	CONTEMPORARY PROBLEMS OF ECOLOGY	Article	Pinus sibirica; Nucifraga caryocatactes; upper forest border; seed bearing; regeneration; dispersal; number dynamics; consortion	A new method for determining the upper forest border (UFB) as the border of the "root-closed" stand and regrowth as its potential vanguard is proposed. The mass dispersal of Pinus sibirica populations by the nutcracker (Nucifraga caryocatactes) in the UFB ecotone in the Northern Urals (Pavdinskii Kamen' and Tretii Bugor Mountain) from the middle-mountain taiga to the mountain forest tundra and tu…	2018	11	4	http://dx.doi.org/10.1134/S1995425518040078	WOS:000441979200006
202	J	Budeanu, M; Popescu, F; Besliu, E; Apostol, EN	Adaptability of Swiss Stone Pine (<i>Pinus cembra</i>) in Two Different Environmental Conditions of Romanian Carpathians	APPLIED SCIENCES-BASEL	Article	breeding strategy; forward selection; juvenile-adult correlations; Romanian forests	Featured Application Afforestation of mixed spruce-pine stands more resistant to windfall at the upper altitudinal limit of Romanian forests. Abstract Swiss stone pine (Pinus cembra) is a feasible solution for increasing the resistance of future mixed spruce-pine stands to windfall at the upper altitudinal limit of Romanian forests. This study aims to analyze the adaptability of ten full-sib fami…	2024	14	16	http://dx.doi.org/10.3390/app14167428	WOS:001306865500001
203	J	Nardin, M; Musch, B; Rousselle, Y; Guérin, V; Sanchez, L; Rossi, JP; Gerber, S; Marin, S; Pâques, LE; Rozenberg, P	Genetic differentiation of European larch along an altitudinal gradient in the French Alps	ANNALS OF FOREST SCIENCE	Article	Genetic diversity; Spatial genetic structure; Larix decidua; Microsatellite markers; Mountain; Population structure	Despite variable dynamics of genetic diversification at the different altitudinal levels, strong gene flow tends to standardize larch genetic diversity: the larch forest distributed along the altitudinal gradient can be regarded as a single population. While in forest tree species many studies focus on the structure of the genetic diversity at the natural range and at the forest stand levels, few…	2015	72	5	http://dx.doi.org/10.1007/s13595-015-0483-8	WOS:000356794100002
204	J	Longauer, R; Gömöry, D; Paule, L; Karnosky, DF; Mankovská, B; Müller-Starck, G; Percy, K; Szaro, R	Selection effects of air pollution on gene pools of Norway spruce, European silver fir and European beech	ENVIRONMENTAL POLLUTION	Article	Picea abies; Abies alba; Fagus sylvatica; isozymes; air pollution	The effects of industrial pollution on allelic and genotypic structures of Norway spruce, European silver fir and European beech were investigated by means of isozyme analysis. In a mixed Norway spruce-silver fir forest stand in an area heavily polluted by sulphur dioxide and heavy metals in the region of Spis (eastern Slovakia), pairs of neighbouring damaged and apparently healthy trees were sel…	2001	115	3	http://dx.doi.org/10.1016/S0269-7491(01)00230-5	WOS:000172631100007
205	J	Korshikov, II; Pirko, YV	Genetic variation and differentiation of peat-bog and dry-meadow populations of the dwarf mountain pine <i>Pinus mugo</i> Turra in the highlands of the Ukrainian Carpathians	RUSSIAN JOURNAL OF GENETICS	Article		Based on electrophoretic analysis of 21 isozyme loci controlling 10 enzyme systems, the intra- and interpopulation variation was studied in two peat-bog and three dry-meadow populations of the dwarf mountain pine Pinus mugo Turra from the highlands of the Ukrainian Carpathians. In the studied samples (a total of 164 trees), on average 62% of the studied genes were polymorphic; the mean heterozygo…	2002	38	9	http://dx.doi.org/10.1023/A:1020287630826	WOS:000178080900006
206	J	Korshikov, II; Privalikhin, SN	Genetic structure of populations of Norway spruce (<i>Picea abies</i> (L.) Karst. from Ukrainian Carpathians	RUSSIAN JOURNAL OF GENETICS	Article		The genetic diversity, subdivision, and differentiation of nine populations of Norway spruce (Picea abies (L.) Karst.) in Ukrainian Carpathians were studied using electrophoretic analysis of variability of enzyme systems in 346 trees aged from 80 to 150 years. Based on electrophoretic fractionation of enzymes extracted from seed endosperms in vertical slabs of 7.5% polyacrylamide gel, 20 loci of …	2007	43	12	http://dx.doi.org/10.1134/S1022795407120058	WOS:000251796600005
207	J	Semerikov, VL; Semerikova, SA; Putintseva, YA; Oreshkova, NV; Krutovsky, KV	Mitochondrial DNA in Siberian conifers indicates multiple postglacial colonization centers	CANADIAN JOURNAL OF FOREST RESEARCH	Article	mitochondrial DNA; NGS; phylogeography; Abies sibirica; Larix sibirica; refugia; pollen data; macrofossils; environmental niche modelling	The geographic variation of the mitochondrial DNA in Siberian fir (Abies sibirica Ledeb.) was studied using the newly developed markers and compared with the phylogeographic pattern of another previously studied Siberian conifer, Siberian larch (Larix sibirica Ledeb.). Similar to Siberian larch, the distribution of mtDNA haplotypes in Siberian fir revealed clear differentiation among distinct geo…	2019	49	8	http://dx.doi.org/10.1139/cjfr-2018-0498	WOS:000476833200002
208	J	Wang, XR; Chhatre, VE; Nilsson, MC; Song, W; Zackrisson, O; Szmidt, AE	Island population structure of Norway spruce (<i>Picea abies</i>) in northern Sweden	INTERNATIONAL JOURNAL OF PLANT SCIENCES	Article	AFLP; clones; fire disturbance; genetic structure; island size; regeneration	Picea abies, which is predominantly sexual, has been reported to propagate vegetatively through layering in a cold harsh climate, although this has not been demonstrated genetically. Using 105 amplified fragment length polymorphism markers, we analyzed 117 trees of Norway spruce from seven islands in Lake Hornavan in Lapland, northern Sweden. These islands differ in size, time since last wildfire…	2003	164	5	http://dx.doi.org/10.1086/376811	WOS:000186318300005
209	J	Araki, NHT; Khatab, IA; Hemamali, KKGU; Inomata, N; Wang, XR; Szmidt, AE	Phylogeography of <i>Larix sukaczewii</i> Dyl. and <i>Larix sibirica</i> L. inferred from nucleotide variation of nuclear genes	TREE GENETICS & GENOMES	Article	phylogeography; Larix; conifer; internal transcribed spacer (ITS); 5.8 S nuclear ribosomal DNA (rDNA); 4-coumarate : coenzyme A ligase (4CL); Pleistocene refugia	We investigated phylogeography of Larix sukaczewii and Larix sibirica using nucleotide variation at three following nuclear gene regions: 5.8 S rDNA including two internal transcribed spacers (ITS), cinnamyl alcohol dehydrogenase (CAD), and phytochrome-O (PHYO). We also included sequences of the 4-coumarate: coenzyme A ligase (4CL) gene region obtained in our recent study. CAD and PHYO showed ver…	2008	4	4	http://dx.doi.org/10.1007/s11295-008-0137-1	WOS:000258548600003
210	J	Karlsson, B; Tsopelas, P; Zamponi, L; Capretti, P; Soulioti, N; Swedjemark, G	Susceptibility to <i>Heterobasidion parviporum</i> in <i>Picea abies</i> clones grown in different environments	FOREST PATHOLOGY	Article		Thirty-five Norway spruce, Picea abies, clones from Sweden were tested for resistance to Heterobasidion parviporum. Rooted cuttings of the clones were planted in Italy and Greece and cultivated for two growing seasons before inoculation with H. parviporum. Extent of infection was determined 6 weeks later. The results were compared to those of earlier inoculations in Sweden. Plant growth traits we…	2008	38	2	http://dx.doi.org/10.1111/j.1439-0329.2008.00543.x	WOS:000254191200003
211	J	Nechaeva, YS; Julanov, AA; Boronnikova, SV; Prishnivskaya, YV	Nucleotide polymorphisms of candidate genes of adaptive significance in the ural populations of <i>Larix sibirica</i> Ledeb.	RUSSIAN JOURNAL OF GENETICS	Article	genetic diversity; locus; molecular marker; SNP; Siberian larch	The objectives of conservation and sustainable forest management require in depth study of genomes of woody plants and definition of their intraspecific genetic diversity. In recent years, an approach was developed based on the study of "candidate genes" that can potentially be involved in the formation of adaptive traits. In this study, we investigated nucleotide polymorphism of several adaptive…	2017	53	5	http://dx.doi.org/10.1134/S1022795417050064	WOS:000403004100008
212	J	Wachowiak, W; Cavers, S; Zukowska, WB	Interspecific gene flow and ecological selection in a pine (<i>Pinus</i> sp.) contact zone	PLANT SYSTEMATICS AND EVOLUTION	Article	Nucleotide polymorphisms; Hybridization; Natural selection; Divergence; Pinus mugo; Pinus sylvestris	Nucleotide polymorphisms in a set of nuclear genes were studied in a sympatric population of pines Pinus mugo and Pinus sylvestris that includes trees classified as pure species and polycormic (multi-stemmed) individuals of potentially hybrid origin. Patterns of genetic diversity were compared between those groups of samples and to the reference allopatric populations of the species in Europe. Po…	2015	301	6	http://dx.doi.org/10.1007/s00606-014-1182-x	WOS:000354243900008
213	J	Wojnicka-Póltorak, A; Celinski, K; Chudzinska, E	Temporal dynamics in the genetic structure of a natural population of <i>Picea abies</i>	BIOLOGIA	Article	age classes; DNA markers; genetic differentiation; old-growth population; primeval gene pool	The temporal dynamics of the genetic diversity of the Norway spruce population provide valuable information on the conservation and management of its genetic resources. The relationships between genetic and demographic parameters are of fundamental importance for understanding the adaptability of forest tree populations. The study was aimed at determining the genetic differentiation of five age c…	2016	71	8	http://dx.doi.org/10.1515/biolog-2016-0109	WOS:000384603500004
214	J	Boratynska, K; Dzialuk, A; Lewandowski, A; Marcysiak, K; Jasinska, AK; Sobierajska, K; Tomaszewski, D; Burczyk, J; Boratynski, A	Geographic distribution of quantitative traits variation and genetic variability in natural populations of <i>Pinus mugo</i> in Central Europe	DENDROBIOLOGY	Article	genetic diversity; isozymes; isolation by distance (IBD); phenotypic diversity; chloroplast microsatellites	Divergence in genetic as well as phenotypic structures can be expected in species with disjunctive geographic ranges and restricted gene flow among isolated populations. Dwarf mountain pine has such a disjunctive geographic range in the mountains of Central Europe. We hypothesised that populations of Pinus mugo from the Giant Mts. differ from Alpine and Carpathian populations to a greater extent …	2014	72		http://dx.doi.org/10.12657/denbio.072.006	WOS:000343657700006
215	J	Högberg, KA; Hallingbäck, HR; Säll, H; Johansson, M; Jansson, G	The potential for the genetic improvement of sawn timber traits in <i>Picea abies</i>	CANADIAN JOURNAL OF FOREST RESEARCH-REVUE CANADIENNE DE RECHERCHE FORESTIERE	Article	correlated response; field measurements; Norway spruce; sawmill study; structural quality traits; quantitative genetics	This study evaluated the potential for the selective genetic improvement of the structural quality traits important in sawn Norway spruce (Picea abies (L.) Karst.) timber based on early and nondestructively assessed field traits. From a 34-year-old Norway spruce trial situated in southern Sweden, 401 butt logs were sampled and sawn to produce two 50 x 100 mm boards that were dried to an 18% moist…	2014	44	4	http://dx.doi.org/10.1139/cjfr-2013-0382	WOS:000333453100001
216	J	Sobierajska, K; Wachowiak, W; Zaborowska, J; Labiszak, B; Wójkiewicz, B; Sekiewicz, M; Jasinska, AK; Sekiewicz, K; Boratynska, K; Marcysiak, K; Boratynski, A	Genetic Consequences of Hybridization in Relict Isolated Trees <i>Pinus sylvestris</i> and the <i>Pinus mugo</i> Complex	FORESTS	Article	biostatistics; hybridization; gene flow; genetic variation; molecular markers; morphological variation; plant variation	Scots pine (Pinus sylvestris L.) and the taxa from the P. mugo complex can hybridize in the contact zones and produce fertile hybrids. A unique example of an early Holocene relict population of P. sylvestris and P. uliginosa (a taxon from the P. mugo complex) growing on the tops of Jurassic sandstone rocks is located in Bledne Skaly (Sudetes). Phenotypically, there are trees resembling P. sylvest…	2020	11	10	http://dx.doi.org/10.3390/f11101086	WOS:000585284300001
217	J	Ciocîrlan, E; Sofletea, N; Mihai, G; Teodosiu, M; Curtu, AL	Comparative analysis of genetic diversity in Norway spruce (<i>Picea abies</i>) clonal seed orchards and seed stands	NOTULAE BOTANICAE HORTI AGROBOTANICI CLUJ-NAPOCA	Article	genetic diversity; microsatellite; Norway spruce; seed orchards; seed stands	Norway spruce, Picea abies (L.) Karst. is the most important conifer species in Romania and the most planted tree species in the Carpathian Mountains. Here we compare the genetic diversity of four Norway spruce clonal seed orchards and two seed stands located in the Eastern Carpathians. A set of highly polymorphic nuclear microsatellite markers was used. The analysis of genotypic identity of rame…	2021	49	4	http://dx.doi.org/10.15835/nbha49412575	WOS:000768415500003
218	J	Litkowiec, M; Dering, M; Lewandowski, A	Utility of two mitochondrial markers for identification of <i>Picea abies</i> refugial origin	DENDROBIOLOGY	Article	Norway spruce; PCR-RFLP; mtDNA; molecular markers	Picea abies (L.) Karst is one of the most important coniferous species of Europe from both ecological and economical points of view. Traditional methods for the gene pool conservation and biodiversity maintenance in forest ecosystems have been practiced in many countries. For progress in this field using highly polymorphic genetic molecular markers is needed. Our goal was to demonstrate the utili…	2009	61			WOS:000268301300008
219	J	Bondar, EI; Feranchuk, S; Miroshnikova, KA; Sharov, VV; Kuzmin, DA; Oreshkova, N; Krutovsky, K	Annotation of Siberian Larch (<i>Larix sibirica</i> Ledeb.) Nuclear Genome-One of the Most Cold-Resistant Tree Species in the Only Deciduous GENUS in <i>Pinaceae</i>	PLANTS-BASEL	Article	angiosperms; annotation; conifer; deciduous; genome; gymnosperms; microsatellites; RNA-seq; repeats; seasonal senescence; Siberian larch; transcriptome; transposons	The recent release of the nuclear, chloroplast and mitochondrial genome assemblies of Siberian larch (Larix sibirica Ledeb.), one of the most cold-resistant tree species in the only deciduous genus of Pinaceae, with seasonal senescence and a rot-resistant valuable timber widely used in construction, greatly contributed to the development of genomic resources for the larch genus. Here, we present …	2022	11	15	http://dx.doi.org/10.3390/plants11152062	WOS:000840237300001
220	J	Oreshkova, NV; Sedel'nikova, TS; Pimenov, AV; Efremov, SP	Analysis of genetic structure and differentiation of the bog and dry land populations of <i>Pinus sibirica</i> Du Tour based on nuclear microsatellite loci	RUSSIAN JOURNAL OF GENETICS	Article		We evaluated the population structure of the bog and dry land populations of the Siberian pine Pinus sibirica (P. sibrica) in Western Siberia using nuclear genome markers. Six pairs of nuclear microsatellite loci were used for this analysis. We detected 30 allelic variants in 120 individuals of four populations of P. sibirica. We established that the studied populations differ by genetic structur…	2014	50	9	http://dx.doi.org/10.1134/S1022795414090105	WOS:000342422600006
221	J	Popovic, V; Lucic, A; Rakonjac, L; Vemic, A; Jovanovic, S; Nikolic, BM; Miljkovic, D	Variability of Silver Fir Needle (Abies alba Mill.) Anatomical Features in the Southeast Europe Natural Populations	PLANTS-BASEL	Article	environmental conditions; correlation anatomical needle traits; needle anatomy; populations	The survival of marginal/peripheral silver fir (Abies alba Mill.) populations in the broader region of Southeast Europe is endangered due to climate change and population decline. This study aimed to determine the level and pattern of variability for the anatomical traits of needles and the possibility of linking the pattern of phenotypic variability with environmental factors. In most of the ana…	2024	13	10	http://dx.doi.org/10.3390/plants13101307	WOS:001231448200001
223	J	Liesebach, M	On the adaptability of Norway spruce (<i>Picea abies</i> (L.) Karst.) to the projected change of climate in Germany	FORSTWISSENSCHAFTLICHES CENTRALBLATT	Article	genetic structure; climate change; isozyme; simulation; Picea abies	It has been predicted that in the coming decades the global climate will get warmer and in some regions dryer. Global warming may influence the genetic structure of forest tree populations. This paper presents a simulation study on possible effects of an increasing annual mean temperature and decreasing precipitation during the growing season on the genetic structure characterised by inventories …	2002	121			WOS:000176799400010
226	J	Solvin, TM; Skroppa, T; Steffenrem, A	Diallel crosses in <i>Picea abies</i> V. Can early testing predict long-term performance?	SILVAE GENETICA	Article	heritability; genetic correlations; phenology; growth; G x E interactions; early testing	Genetic variation and performance of up to 40-year-old Norway spruce (Picea abies (L.) Karst.) families from half-diallel crosses made in natural populations where studied, and the results were compared with results from nursery test of seedlings (1-2 years from seed) and short-term farm-field tests at 6-10 years from seed. The diallel analyses revealed significant levels of additive genetic vari…	2024	73	1	http://dx.doi.org/10.2478/sg-2024-0005	WOS:001202002400001
227	J	Mihai, G; Mirancea, I	Age trends in genetic parameters for growth and quality traits in <i>Abies</i> <i>alba</i>	IFOREST-BIOGEOSCIENCES AND FORESTRY	Article	Age-age Correlations; Genetic Gain; Heritability; Optimum Age; Progeny Trial; Silver Fir	Genetic parameters for growth, stem straightness, survival, wood density and percentage of late wood were estimated in a progeny test of European silver fir (Abies alba Mill.) established in Romania in 1980. The experiment was conducted on 95 families collected from 10 natural stands and five provenance regions, and trait measurements were taken 6-34 years after planting. The family effect was hi…	2016	9		http://dx.doi.org/10.3832/ifor1766-009	WOS:000391850300014
228	J	Maghuly, F; Pinsker, W; Praznik, W; Fluch, S	Genetic diversity in managed subpopulations of Norway spruce [<i>Picea abies</i> (L.) Karst.]	FOREST ECOLOGY AND MANAGEMENT	Article	Picea abies; nuclear microsatellites; chloroplast microsatellites; mitochondrial DNA; genetic diversity; population differentiation; Norway spruce; Austria	Uniparentally inherited chloroplast simple sequence repeats (cpSSRs), mitochondrial markers (mt), as well as biparentally inherited nuclear simple sequence repeats (SSRs) were used to analyse genetic diversity in different subpopulations of Norway spruce in Austria. For that purpose Norway spruce individuals of different age classes, old (70-100 years) versus young (6-10 years) trees, were finger…	2006	222	45717	http://dx.doi.org/10.1016/j.foreco.2005.10.025	WOS:000235599700026
229	J	Dzialuk, A; Chybicki, I; Gout, R; Maczka, T; Fleischer, P; Konrad, H; Curtu, AL; Sofletea, N; Valadon, A	No reduction in genetic diversity of Swiss stone pine (<i>Pinus cembra</i> L.) in Tatra Mountains despite high fragmentation and small population size	CONSERVATION GENETICS	Article	Allelic richness; Inbreeding; Genetic drift; In situ conservation; Alps; Carpathians	In Europe, most of the alpine timberline ecotone has been altered by human activities and climate change. Hence, mountain forests are of the highest conservation interest. Here, we screened 25 populations of Swiss stone pine (Pinus cembra L.) from the Carpathians and the Alps, using a set of ten microsatellite primers to assess the relative conservation value of populations sampled in Polish and …	2014	15	6	http://dx.doi.org/10.1007/s10592-014-0628-6	WOS:000344777500015
230	J	Hallingbäck, HR; Jansson, G; Hannrup, B	Genetic parameters for grain angle in 28-year-old Norway spruce progeny trials and their parent seed orchard	ANNALS OF FOREST SCIENCE	Article	spiral grain; shape stability; heritability; breeding; Picea abies	Sawn wood which acquires twist during drying is a substantial problem for the sawmill industry and is to a large extent caused by spiralled grain in the tree. In this study, the feasibility of using spiral grain angles as a selection trait in Norway spruce (Picea abies (L.) Karst) tree breeding and the extent of grain angle and its breeding values were investigated. Grain angles under bark and di…	2008	65	3	http://dx.doi.org/10.1051/forest:2008005	WOS:000256028200001
231	J	Bolibok, L; Zajaczkowski, J; Dobrowolska, D; Mionskowski, M	Potential climatic range for <i>Abies</i> <i>alba</i> Mill. in Poland	SYLWAN	Article	silver fir; natural range potential climatic range; biocilmate envelops	Numerous examples of silver fir stands growing outside its geographical range in northern Poland suggest that this species could be used in a greater extend in creation of managed forest stands. Climatic conditions could potentially constrain the use of this species in some parts of country. The objective of this work was to determine the potential climatic range of Abies alba in Poland. The bioc…	2016	160	6		WOS:000379197400010
232	J	Wellendorf, H; Thomsen, IM	Genetic Variation in Resistance Against <i>Heterobasidion annosum</i> (Fr.) Bref. in <i>Picea abies</i> (L.) Karst. Expressed After Inoculation of Neighboring Stumps	SILVAE GENETICA	Article	Heterobasidion annosum; Picea abies; genetic variation; resistance; stump inoculation	Based on the well-established knowledge that important spread of H. annosum is performed through, spore infection of stumps and subsequent spread ofinycelium to neighboring trees at points of root contact, an inoculation experiment was established in three adjacent fully pedigreed 17-year old Norway spruce field trials. In June 1995, every third row was cut and stump-inoculated with conidia belon…	2008	57	6	http://dx.doi.org/10.1515/sg-2008-0047	WOS:000264748300003
233	J	Zhulanov, A; Chertov, N; Nechaeva, Y; Pechenkina, V; Zhulanova, L; Boronnikova, S; Kalendar, R	Genetic Uniqueness and Genetic Structure of Populations of Picea obovata Ledeb. and Larix sibirica Ledeb. in the Northern and Middle Urals	FORESTS	Article	genetic differentiation; genetic originality; genetic structure; inter simple sequence repeats (ISSR); Larix; Picea; typical alleles; Ural	Establishing sustainable plantations with genetic diversity equivalent to that of natural populations is vital for successful reforestation efforts. In this study, we present an innovative approach for selecting populations suitable for reforestation, taking into account their genetic uniqueness using Inter Simple Sequence Repeats (ISSR) markers. Our investigation focused on six populations of Pi…	2023	14	9	http://dx.doi.org/10.3390/f14091822	WOS:001073595000001
234	C	Longauer, R; Prus-Glowacki, W; Gömöry, D; Paule, L; Wojnicka-Poltorak, K; Szaro, R; Karnosky, D	Effects of stand origin on genetic pools of Norway spruce and European silver fir	EFFECTS OF AIR POLLUTION ON FOREST HEALTH AND BIODIVERSITY IN FORESTS OF THE CARPATHIAN MOUNTAINS	Proceedings Paper		The effects of stand origin on the genetic structure of European silver Fir (Abies alba MILL.) and Norway spruce (Picea abies KARST.) were studied in Central Slovakia and the Polish pail of the Tatra Mts. Genetic structures of artificially regenerated stands appeared to be different from naturally regenerated stands especially for silver fir, where 10 natural stands was compared with 3 artificial…	2002	345			WOS:000178771700017
235	J	Nikkanen, T; Aronen, T; Häggman, H; Venäläinen, M	Variation in pollen viability among <i>Picea abies</i> genotypes -: potential for unequal paternal success	THEORETICAL AND APPLIED GENETICS	Article	Norway spruce; pollination; germination of pollen; pollen-tube growth; functioning of seed orchard	An in vitro germination method was used to study variation in pollen viability, that is pollen-tube growth rate together with germination percentage, among the Picea abies genotypes in a seed orchard. The method permits easy, rapid screening of large numbers of genotypes. Significant variation in pollen viability among the genotypes was evident, the differences among the pollen-lot means being 7-…	2000	101	4	http://dx.doi.org/10.1007/s001220051510	WOS:000089517200002
236	S	Samec, P; Rychtecká, P; Horácek, M; Turek, K; Vlcková, V	Geoinformatic model of risk growth conditions for Norway spruce stands in the Podbeskydsky and Beskydsky biogeographical regions (Czech Republic)	ACTA MUSEI BESKIDENSIS, VOL 4	Article; Book Chapter	Picea abies; forest decline; GIS overlay; spatial modelling; bark-beetles; Honey fungus	Rapid large-areal dieback of Central-European Norway spruce (Picea abies (L.) Karst.) stands is increasingly becoming consequential problem of present European forestry. According to empirical approaches, the three main zones of different Picea abies risk growth condition were estimated in the Podbeskydsky and Beskydsky biogeographical regions (Outer Western Carpathians, the Czech Republic). The …	2012	4			WOS:000319705800001
237	J	Gil-Muñoz, F; Bernhardsson, C; Ranade, SS; Scofield, DG; Pulkkinen, PO; Ingvarsson, PK; García-Gil, MR	QTL mapping of the narrow-branch "Pendula" phenotype in Norway spruce (<i>Picea abies</i> L. Karst.)	TREE GENETICS & GENOMES	Article	Spruce; Pendula; QTL; Forest breeding; Genetic map; Picea	Pendula-phenotyped Norway spruce has a potential forestry interest for high-density plantations. This phenotype is believed to be caused by a dominant single mutation. Despite the availability of RAPD markers linked to the trait, the nature of the mutation is yet unknown. We performed a quantitative trait loci (QTL) mapping based on two different progenies of F1 crosses between pendula and normal…	2023	19	3	http://dx.doi.org/10.1007/s11295-023-01599-6	WOS:000983188000001
238	J	Kamaityte-Bukelskiene, L; Loziene, K; Labokas, J	Dynamics of Isomeric and Enantiomeric Fractions of Pinene in Essential Oil of <i>Picea abies</i> Annual Needles during Growing Season	MOLECULES	Article	Norway spruce; essential oil; &#945; -pinene; &#946; -pinene; (&#8722; ) and (+) enantiomers	Norway spruce (Picea abies (L.) H. Karst.) is one of the most important commercial tree species distributed naturally in the Boreal and subalpine forest zone of Europe. All parts of spruce trees, including needles, accumulate essential oils with a variety of chemical properties and ecological functions, such as modulating plant-insect communication. Annual needle samples from 15 trees (five from …	2021	26	8	http://dx.doi.org/10.3390/molecules26082138	WOS:000644580800001
239	J	Wang, X; Ingvarsson, PK	Quantifying adaptive evolution and the effects of natural selection across the Norway spruce genome	MOLECULAR ECOLOGY	Article	balancing selection; negative selection; Picea abies; positive selection; whole-genome resequencing	Detecting natural selection is one of the major goals of evolutionary genomics. Here, we sequenced the whole genome of 25 Picea abies individuals and quantified the amount of selection across the genome. Using an estimate of the distribution of fitness effects, we showed that both negative selection and the rate of positively selected substitutions are very limited in coding regions. We found a p…	2023	32	19	http://dx.doi.org/10.1111/mec.17106	WOS:001133973500001
240	J	Siljak-Yakovlev, S; Cerbah, M; Coulaud, J; Stoian, V; Brown, SC; Zoldos, V; Jelenic, S; Papes, D	Nuclear DNA content, base composition, heterochromatin and rDNA in <i>Picea omorika</i> and <i>Picea abies</i>	THEORETICAL AND APPLIED GENETICS	Article	Picea; fluorochrome banding; flow cytometry; in situ hybridization; 18S-5.8S-26S and 5S rDNA; nucleolar organizer region	Two closely related spruces, Picea abies and Picea omorika, a Balkan paleoendemic species, often share habitats, yet never hybridize in nature. The present study adresses their characteristics such as nuclear DNA content, base composition, heterochromatin and rDNA pattern. The genome size of P abies was 10% larger than that of P. omorika when assessed by flow cytometry, respectively 2C=37.2 pg an…	2002	104	45718	http://dx.doi.org/10.1007/s001220100755	WOS:000174376400044
241	J	Szymanski, N; Wilczynski, S	Radial Growth Response of European Larch Provenances to Interannual Climate Variation in Poland	FORESTS	Article	Larix decidua; tree-ring; climatic sensitivity; temperature; precipitation; provenance trial; dendroecology	The present study identified the similarities and differences in the radial growth responses of 20 provenances of 51-year-old European larch (Larix decidua Mill.) trees from Poland to the climatic conditions at three provenance trials situated in the Polish lowlands (Siemianice), uplands (Bli(z) over dotyn) and mountains (Krynica). A chronology of radial growth indices was developed for each of 6…	2021	12	3	http://dx.doi.org/10.3390/f12030334	WOS:000633679700001
242	J	Postolache, D; Leonarduzzi, C; Piotti, A; Spanu, I; Roig, A; Fady, B; Roschanski, A; Liepelt, S; Vendramin, GG	Transcriptome versus Genomic Microsatellite Markers: Highly Informative Multiplexes for Genotyping <i>Abies alba</i> Mill. and Congeneric Species	PLANT MOLECULAR BIOLOGY REPORTER	Article	EST-SSRs; Genomic SSRs; Multiplex PCR; Diversity; Silver fir	The availability of high-resolution, cost-effective polymorphic genetic markers displaying Mendelian inheritance is a prerequisite for fine-scale population genetic analyses as well as informed conservation and sustainable management. Silver fir (Abies alba Mill.) is a widespread European species of economic and ecological importance for which genetic markers are needed but difficult to develop, …	2014	32	3	http://dx.doi.org/10.1007/s11105-013-0688-7	WOS:000335158500012
244	J	Blada, I; Popescu, F	Diallel Crossing in <i>Pinus cembra</i>: V.Age Trends in Genetic Parameters and Genetic Gain for Height	SILVAE GENETICA	Article	Pinus cembra; diallel crossing; additive variance; dominance ratio; genetic effect; age-age genetic correlation; heritability; early selection; genetic gain	A full diallel mating design (10 parents) was carried out in a Swiss stone pine panmictic population from the Carpathian Mountains. At age six, after nursery testing, the progenies were field planted to one site, using a completely randomized block design with 100 families, four replicates and a 15 tree row-plot per replication, spaced 2.5 x 2.5 m. Total and annual height of all individuals of th…	2012	61	45689	http://dx.doi.org/10.1515/sg-2012-0009	WOS:000307158200009
245	C	Walter, C; Bishop-Hurley, S; Charity, J; Find, J; Grace, L; Höfig, K; Holland, L; Möller, R; Moody, J; Wagner, A; Walden, A	Genetic engineering of <i>Pinus radiata</i> and <i>Picea abies</i>, production of transgenic plants and gene expression studies	MOLECULAR BREEDING OF WOODY PLANTS, PROCEEDINGS	Proceedings Paper		Plantation forestry, based on successful breeding of superior tree genotypes, is becoming more widely used by international forestry companies, since it offers the possibility to grow and manage forests of high economic value and superior quality. However, a number of highly desirable traits are not readily available in the breeding population and may be introduced using desirable genes from othe…	2001	18		http://dx.doi.org/10.1016/S0921-0423(01)80075-7	WOS:000178710200026
246	J	Sonesson, J; Jansson, G; Eriksson, G	Retrospective genetic testing of <i>Picea abies</i> under controlled temperature and moisture regimes	CANADIAN JOURNAL OF FOREST RESEARCH	Article		A retrospective early test of Picea abies (L.) Karst. was conducted under two temperature ("high" and "low") and two irrigation ("well-watered" and "drought") regimes. Height, dry mass, and phenological traits were assessed for seedlings from 36 open-pollinated families grown in a growth chamber for two growth periods. The attributes measured were compared with the growth traits of three 24-year-…	2002	32	1	http://dx.doi.org/10.1139/x01-175	WOS:000173523100010
247	J	Gerendiain, AZ; Peltola, H; Pulkkinen, P	Growth and Wood Property Traits in Narrow Crowned Norway Spruce (<i>Picea abies</i> f. <i>pendula</i>) Clones Grown in Southern Finland	SILVA FENNICA	Article; Proceedings Paper	diameter; earlywood; fibre length; height; latewood; stem volume; wood density	We investigated the growth, yield, wood density traits and fibre properties in 13 narrow crowned Norway spruce (Picea abies f. pendula) clones grown at a spacing of 2 m x 1.5 m (about 3300 seedlings/ha) in a field trial established in 1988 in southern Finland on a forest soil. For comparison, we used 3 normal crowned Norway spruce (Picea abies (L.) Karst.) genetic entries grown as a mixture in th…	2009	43	3	http://dx.doi.org/10.14214/sf.194	WOS:000269584700005
248	J	Máchová, P; Trcková, O; Cvrcková, H	Use of Nuclear Microsatellite Loci for Evaluating Genetic Diversity of Selected Populations of <i>Picea abies</i> (L.) Karsten in the Czech Republic	FORESTS	Article	Picea abies; nuclear microsatellites; genetic diversity; gene conservation unit	DNA polymorphism at nine nuclear microsatellites of nine selected naturally-regenerated Norway spruce populations growing mainly within gene conservation units in different parts of the Czech Republic was studied. To verify the genetic quality of the selected gene conservation unit, we analyzed nine Norway spruce subpopulations from gene conservation unit GZ 102-Orlicke hory. Genetic parameters c…	2018	9	2	http://dx.doi.org/10.3390/f9020092	WOS:000427520600045
249	J	Chen, ZQ; Hai, HNT; Helmersson, A; Liziniewicz, M; Hallingbäck, HR; Fries, A; Berlin, M; Wu, HX	Advantage of clonal deployment in Norway spruce (<i>Picea abies</i> (L.) H. Karst)	ANNALS OF FOREST SCIENCE	Article	Clonal forestry; Family forestry; Wood quality traits; DBH; Genetic gain; Non-additive genetic variance	Key message There is considerable genetic gain of tree volume from clonal deployment in Norway spruce (Picea abies(L.) H. Karst) and clonal deployment will have at least 50% more or double genetic gain than the seedling deployment. Context Genetic parameters and genetic gains for wood quality and growth traits were estimated in six large clonal progeny trials. Aims Develop the optimal clonal depl…	2020	77	1	http://dx.doi.org/10.1007/s13595-020-0920-1	WOS:000513953200002
250	J	George, JP; Grabner, M; Karanitsch-Ackerl, S; Mayer, K; Weissenbacher, L; Schueler, S	Genetic variation, phenotypic stability, and repeatability of drought response in European larch throughout 50 years in a common garden experiment	TREE PHYSIOLOGY	Article	common garden experiment; degree of genetic determination; drought response; European larch; Larix decidua; repeatability	Assessing intra-specific variation in drought stress response is required to mitigate the consequences of climate change on forest ecosystems. Previous studies suggest that European larch (Larix decidua Mill.), an important European conifer in mountainous and alpine forests, is highly vulnerable to drought. In light of this, we estimated the genetic variation in drought sensitivity and its degree…	2017	37	1	http://dx.doi.org/10.1093/treephys/tpw085	WOS:000397051600004
251	J	Swedjemark, G; Karlsson, B; Stenlid, J	Exclusion of <i>Heterobasidion parviporum</i> from inoculated clones of Picea abies and evidence of systemic induced resistance	SCANDINAVIAN JOURNAL OF FOREST RESEARCH	Article	genetic variation; inoculation experiment; Norway spruce clones; resistance testing; root rot	Four groups of 30 4-year-old clones of Picea abies (L.) Karst. were inoculated with Heterobasidion parviporum (Fr.) Niemela & Korhonen. Trees were harvested at weeks 5, 14 and 34. Infection success was 95% and 61% at 5 and 14 weeks, respectively. At 34 weeks, the pathogen was completely excluded from all plants, An experiment to test for induced resistance was also conducted at 78 weeks. Seven ra…	2007	22	2	http://dx.doi.org/10.1080/02827580701262774	WOS:000246304100004
252	J	Hallingbäck, HR; Jansson, G; Hannrup, B	Genetic correlations between spiral grain and growth and quality traits in <i>Picea abies</i>	CANADIAN JOURNAL OF FOREST RESEARCH	Article		In Norway spruce (Picea abies (L) Karst), spiral grain is a major cause of twist development in sawn timber; this problem could be addressed by breeding for reduced grain angles. This study presents estimates of genetic correlations between grain angle under bark and height and diameter growth, branch number, angle, and thickness; stem straightness. ramicorn occurrence, and pilodyn penetration us…	2010	40	2	http://dx.doi.org/10.1139/X09-173	WOS:000275819500001
253	J	Korshikov, II; Privalikhin, SN; Makogon, IV; Lisnichuk, AN	Features of the Population and Genetic Structure of Norway Spruce (<i>Picea abies</i> (L.) Karst.) from the Ukrainian Carpathian Mountains and Polesie	CYTOLOGY AND GENETICS	Article		Genetic differences between a lowland, island, and sparse population (2 ha) of Norway spruce (Picea abies (L.) Karst.) from Polesie and two populations at different altitudes in the Ukrainian Carpathian Mountains (in the range 1000-1500 in above sea level) are identified on the basis of an analysis of the variability of 20 allozyme loci. Despite the different sizes of the samples, different altit…	2008	42	6	http://dx.doi.org/10.3103/S0095452708060042	WOS:000262727400004
254	J	Páques, LE	Growth Rhythm Parameters as Components of Hybrid Vigour in Young Seedlings of Hybrid Larch (<i>Larix decidua</i> x <i>L-kaempferi</i>)	SILVAE GENETICA	Article	heterosis; phenology; growth; hybrid larch; Larix	Heterosis for growth traits was investigated on 2-yrold seedlings from related intra- and inter-specific progenies collected in hybridisation seed orchards combining Larix decidua (EL) and L. kaempferi (JL) Following taxa identification, seedlings phenology and growth were observed over a complete growing season in two experiments. Start, cessation, duration and rates of growth for the different …	2009	58	45689	http://dx.doi.org/10.1515/sg-2009-0006	WOS:000267171100006
255	J	Vasilyeva, G; Vavilova, V; Ustyantsev, K; Sukhikh, I; Blinov, A; Goroshkevich, S; Sokolov, V	Genetic diversity of <i>Pinus sibirica</i>, <i>P.pumila</i> and their natural hybrids based on non-linked nuclear loci	DENDROBIOLOGY	Article	hybridisation; Siberian stone pine; Siberian dwarf pine; genetic variation	Frequent discordant phylogenies inferred from different loci, as well as the presence of sufficiently diverged gene variants within a single species isolate are indicative of potentially frequent non-monophyly in the genus Pinus. Interspecies hybridisation and incomplete lineage sorting have been suggested as possible explanations for the observed phylogenetic discrepancies. However, there is no …	2018	79		http://dx.doi.org/10.12657/denbio.079.015	WOS:000435409900015
256	J	Chmura, DJ; Guzicka, M; Rozkowski, R; Chalupka, W	Allometry varies among related families of Norway spruce	ANNALS OF FOREST SCIENCE	Article	Allocation; Biomass; Distribution; Growth; Partitioning; Picea abies	Key message Slopes and intercepts of allometric equations for organs' biomass varied among half-sib families of Norway spruce and between age categories in a familydependent manner. Genetic variation should be accounted for when applying allometric analysis to mixtures of genetic groups. Context Genetic variation in relationships among plant biomass components was rarely addressed in trees, thoug…	2017	74	2	http://dx.doi.org/10.1007/s13595-017-0631-4	WOS:000405798400006
258	J	Zukowska, WB; Boratynska, K; Wachowiak, W	Comparison of range-wide chloroplast microsatellite and needle trait variation patterns in Pinus mugo Turra (dwarf mountain pine)	IFOREST-BIOGEOSCIENCES AND FORESTRY	Article	Adaptation; cpSSRs; Genetic Diversity; Morphological Variation; Neutral Genetic Markers; Phenotypic Plasticity	In this study, range-wide genetic variation was analysed in 553 Pinus mugo Turra (dwarf mountain pine) individuals from 21 locations using 11 chloroplast microsatellites. Our main goal was to assess the spatial distribution of neutral genetic variation. We also used data from a previous study on the morphological variation of needles from 18 stands of P. mugo. In total, 22 needle characteristics …	2017	10		http://dx.doi.org/10.3832/ifor1860-009	WOS:000395862000034
259	J	Gryc, V; Hacura, J; Vavrcík, H; Urban, J; Gebauer, R	Monitoring of xylem formation in <i>Picea abies</i> under drought stress influence	DENDROBIOLOGY	Article	Norway spruce; cambium; wood formation; drought stress; Gompertz function	The effect of drought stress on regular cambium activity and wood formation in stems of two different clones of Norway spruce (Picea abies (L.) Karst.) was investigated. Tissue samples were taken during the growing season from May to September 2010. Artificial drought stress, induced by long-term sheltering of the soil, was significantly manifested in clone 15. In the stressed individual, the per…	2012	67			WOS:000304092300002
261	J	Carrer, M; Nola, P; Motta, R; Urbinati, C	Contrasting tree-ring growth to climate responses of <i>Abies alba</i> toward the southern limit of its distribution area	OIKOS	Article		Silver fir Abies alba is an indigenous tree species present in many southern European mountain forests. Its distribution area and its adaptive capacity to climate variability, expressed in tree-ring growth series, make it a very suitable target species for studying responses to climate particularly in a complex area like the Mediterranean basin where significant changes are expected. We used a se…	2010	119	9	http://dx.doi.org/10.1111/j.1600-0706.2010.18293.x	WOS:000281208200017
262	J	Scotti, I; Magni, F; Paglia, GP; Morgante, M	Trinucleotide microsatellites in Norway spruce (<i>Picea abies</i>):: their features and the development of molecular markers	THEORETICAL AND APPLIED GENETICS	Article	Norway spruce; molecular markers; microsatellite; genetic variability; trinucleotide	Trinucleotide microsatellites have proven to be the markers of choice in human genetic analysis because they are easier to genotype than dinucleotides. Their development can be more time-consuming due to their lower abundance in the genome. We isolated trinucleotide microsatellites in Norway spruce (Picea abies K.) using an enrichment procedure for the genomic-library construction. Here we report…	2002	106	1	http://dx.doi.org/10.1007/s00122-002-0986-1	WOS:000180630000005
263	J	Oreshkova, NV; Bondar, EI; Sharov, VV; Dhungana, SP; Gailing, O; Krutovsky, KV	Population genetic variation of microsatellite markers developed for Siberian fir (<i>Abies sibirica</i> Ledeb.) and European silver fir (<i>Abies alba</i> Mill.) using whole genome sequencing data	PLANT GENETIC RESOURCES-CHARACTERIZATION AND UTILIZATION	Article	Abies; conifers; fir; genetic diversity; genome sequencing; microsatellite markers; population structure	The article presents the results of the search for microsatellite or simple sequence repeat (SSR) loci with tri-, tetra-, penta- and hexanucleotide tandem repeat motifs in the draft de novo assembly of the Siberian fir (Abies sibirica Ledeb.) genome and the development of convenient relatively highly and moderately polymorphic markers that can be easily genotyped even by simple gel electrophoresi…	2023	21	2	http://dx.doi.org/10.1017/S1479262123000552	WOS:001164897400009
264	J	Unger, GM; Konrad, H; Geburek, T	Does spatial genetic structure increase with altitude? An answer from Picea abies in Tyrol, Austria	PLANT SYSTEMATICS AND EVOLUTION	Article	Alps; Altitudinal cline; EST-SSRs; Genetic diversity; Norway spruce; Spatial genetic structure	Harsh environment at high altitude may affect the mating system of plant species, especially those with wide ecological amplitude. Smaller effective neighbourhood size, less pollen and seed production, higher rate of inbreeding and a shift towards vegetative propagation may be involved. These changes can be reflected in spatial genetic structure (SGS). Populations of Norway spruce [Picea abies (L…	2011	292	45750	http://dx.doi.org/10.1007/s00606-010-0407-x	WOS:000288661500001
266	J	Zaborowska, J; Perry, A; Cavers, S; Wachowiak, WM	Evolutionary targets of gene expression divergence in a complex of closely related pine species	JOURNAL OF SYSTEMATICS AND EVOLUTION	Article	differential gene expression; high-altitude adaptations; mountain pines; Pinus mugo complex; transcriptome assembly	The environment is a powerful selective pressure for sessile organisms, such as plants, and adaptation to the environment is particularly important for long-lived species, like trees. Despite the importance of adaptive trait variation to the survival and success of trees, the molecular basis of adaptation is still poorly understood. Gene expression patterns in three closely related, but phenotypi…	2023	61	1	http://dx.doi.org/10.1111/jse.12896	WOS:000842942900001
267	J	Carcaillet, C; Blarquez, O	Fire ecology of a tree glacial refugium on a nunatak with a view on Alpine glaciers	NEW PHYTOLOGIST	Article	climate change; European Alps; fire frequency; glacial refugium; paleoecology; tree biomass; vegetation dynamics	In paleoecology, the function of biomass as a fire driver has become a focus of attention in cold ecosystems, and concerns have been raised about climate in this context. Little is known about the fire frequency and fire-plant relationships during glaciation when woodlands were limited and the climate was cold. Fire history and tree biomass were reconstructed from sedimentary charcoal and macrore…	2017	216	4	http://dx.doi.org/10.1111/nph.14721	WOS:000414639800032
269	J	Durodola, B; Blumenstein, K; Terhonen, E	Genetic variation of <i>Picea abies</i> in response to the artificial inoculation of <i>Heterobasidion parviporum</i>	EUROPEAN JOURNAL OF FOREST RESEARCH	Article	Drought stress; Fungi-host relationship; Genotypic variation; Necrosis; Norway spruce; Root rot	Norway spruce Picea abies is one of Europe's most economically important tree species. However, it is highly susceptible to the root rot fungus Heterobasidion parviporum. Climate change will benefit the pathogen as the tree host is weakened by, e.g., extended drought. Breeding can improve forest health, and several root rot genetic markers are suggested to improve the resistance of Norway spruce.…	2023	142	2	http://dx.doi.org/10.1007/s10342-023-01534-3	WOS:000920948600001
270	J	Korecky, J; Cepl, J; Korolyova, N; Stejskal, J; Turcáni, M; Jakus, R	Resistance to Bark Beetle Outbreak in Norway Spruce: Population Structure Analysis and Comparative Genomic Assessment of Surviving (LTS) and Randomly Selected Reference Trees	FORESTS	Article	Picea abies; 50K SNPs genotyping array; Ips typographus; population-genetic structure; GWAS	Norway Spruce (Picea abies (L.) H. Karst.), a timber species of significant economic and ecological importance in the Northern Hemisphere, faces increasing threats imposed by drought and bark beetle infestation intensified by ongoing climate change. Despite the extensive mortality within stands, a small proportion of mature trees remarkably survive during severe bark beetle outbreaks. Hypothesizi…	2023	14	10	http://dx.doi.org/10.3390/f14102074	WOS:001094133900001
271	J	Acheré, V; Faivre-Rampant, P; Jeandroz, S; Besnard, G; Markussen, T; Aragones, A; Fladung, M; Ritter, E; Favre, JM	A full saturated linkage map of <i>Picea abies</i> including AFLP, SSR, ESTP, 5S rDNA and morphological markers	THEORETICAL AND APPLIED GENETICS	Article		Based on an F-1 progeny of 73 individuals, two parental maps were constructed according to the double pseudo-test cross strategy. The paternal map contained 16 linkage groups for a total genetic length of 1,792 cM. The maternal map covered 1,920 cM, and consisted of 12 linkage groups. These parental maps were then integrated using 66 intercross markers. The resulting consensus map covered 2,035 c…	2004	108	8	http://dx.doi.org/10.1007/s00122-004-1587-y	WOS:000221447600019
273	J	Neophytou, C; Fussi, B; Lamprecht, N; Michiels, HG; Seho, M; Mellert, KH	Exploring the Gene Pool of Silver Fir in Southern Germany on the Search for Climate-Smart Seed Sources	SEEFOR-SOUTH-EAST EUROPEAN FORESTRY	Article	Abies alba; genetic diversity; resilience; microsatellites; forest reproductive material	Central European populations of silver fir (Abies alba Mill.) grow under a relatively wide amplitude of environmental conditions. Assuming that forest tree stands are locally adapted, the use of forest reproductive material from sites with limited water availability is expected to increase drought tolerance in future forests. At the same time, genetic diversity is of utmost importance as the basi…	2023	14	2	http://dx.doi.org/10.15177/seefor.23-14	WOS:001134573300012
274	J	Maghuly, F; Burg, K; Pinsker, W; Nittinger, F; Praznik, W; Fluch, S	Short note:: Development of mitochondrial markers for population genetics of Norway spruce [<i>Picea abies</i> (L.) Karst.]	SILVAE GENETICA	Article	mtDNA; marker development; maternal inheritance; population genetics; length polymorphism; null alleles; Picea abies	Norway spruce is an important commercial tree species in northern and central Europe. Pure mitochondrial DNA isolated from tissue culture materials grown in the dark were used to construct a partial mitochondrial library. 100 clones were randomly selected and 19 markers were isolated. Three of these markers proved to be polymorphic and two showed maternal inheritance in controlled crosses. These …	2008	57	1	http://dx.doi.org/10.1515/sg-2008-0007	WOS:000255362200007
275	J	Steffenrem, A; Lindland, F; Skroppa, T	Genetic and environmental variation of internodal and whorl branch formation in a progeny trial of <i>Picea abies</i>	SCANDINAVIAN JOURNAL OF FOREST RESEARCH	Article	branch formation; environmental variation; genetic variation; tree breeding	Progenies from a natural stand of Picea abies planted on a forest site with heterogeneous growth conditions were characterized for genetic and environmental control of internodal and whorl branch formation and lammas growth. The progenies studied were 27 years old from seed and planted in a randomized complete block experiment. Internodes and whorls studied were located in the top section of the …	2008	23	4	http://dx.doi.org/10.1080/02827580802249118	WOS:000258590400002
276	J	Mosca, E; González-Martínez, SC; Neale, DB	Environmental versus geographical determinants of genetic structure in two subalpine conifers	NEW PHYTOLOGIST	Article	environmental gradient; isolation by adaptation; isolation by distance; landscape genetics; outlier locus detection	Alpine ecosystems are facing rapid human-induced environmental changes, and so more knowledge about tree adaptive potential is needed. This study investigated the relative role of isolation by distance (IBD) versus isolation by adaptation (IBA) in explaining population genetic structure in Abies alba and Larix decidua, based on 231 and 233 single nucleotide polymorphisms (SNPs) sampled across 36 …	2014	201	1	http://dx.doi.org/10.1111/nph.12476	WOS:000327348800018
277	J	Mihai, G; Dinca, L	IN SITU CONSERVATION OF FOREST GENETIC RESOURCES FROM THE SOUTHERN CARPATHIANS	INTERNATIONAL JOURNAL OF CONSERVATION SCIENCE	Article	Seed stands; Forest genetic resources; Conservation; Southern Carpathians; Forest management plans	Stands established as seed source and conservation of the forest gene-pool from the Sothern Carpathians were analyzed and described based on 13,806 stand elements. As such, the stands were analyzed from: the surface occupied on functional categories, the tree species and field exposition and slant and station types. From the total surface occupied by forests with a scientific purpose in the South…	2020	11	4		WOS:000595499000017
278	J	Hannrup, B; Säll, H; Jansson, G	Genetic parameters for spiral grain in Scots pine and Norway spruce	SILVAE GENETICA	Article	Pinus sylvestris L; Picea abies L. karst; grain angle; heritability; genetic correlations	Genetic parameters were estimated for grain angle, growth and exterior quality traits in two 18-year-old Scots pine (Pinus sylvestris L.) progeny trials and for grain angle and growth traits in two 12-year-old clonal trials of Norway spruce (Picea abies L. Karst.). Mean grain angles under bark ranged from 1.4 to 2.0 degrees and from 2.1 to 2.6 degrees in the Scots pine and Norway spruce trials, r…	2003	52	45813		WOS:000222360500007
279	J	Wachowiak, W; Palmé, AE; Savolainen, O	Speciation history of three closely related pines <i>Pinus mugo</i> (T.), <i>P. uliginosa</i> (N.) and <i>P. sylvestris</i> (L.)	MOLECULAR ECOLOGY	Article	cpDNA variation; divergence; mtDNA variation; nuclear genes; sequence polymorphisms; speciation	Nucleotide polymorphisms at genomic regions including 17 nuclear loci, two chloroplast and one mitochondrial DNA fragments were used to study the speciation history of three pine species: dwarf mountain pine (Pinus mugo), peat-bog pine (P. uliginosa) and Scots pine (P. sylvestris). We set out to investigate three specific speciation scenarios: (I) P. uliginosa is a homoploid hybrid between the ot…	2011	20	8	http://dx.doi.org/10.1111/j.1365-294X.2011.05037.x	WOS:000289168100014
280	J	Wang, X; Bernhardsson, C; Ingvarsson, PK	Demography and Natural Selection Have Shaped Genetic Variation in the Widely Distributed Conifer Norway Spruce (<i>Picea abies</i>)	GENOME BIOLOGY AND EVOLUTION	Article	genetic diversity; Lewontin's paradox; whole-genome resequencing; demographic; linked selection; mutation rate	Under the neutral theory, species with larger effective population size are expected to harbor higher genetic diversity. However, across a wide variety of organisms, the range of genetic diversity is orders of magnitude more narrow than the range of effective population size. This observation has become known as Lewontin's paradox and although aspects of this phenomenon have been extensively stud…	2020	12	2	http://dx.doi.org/10.1093/gbe/evaa005	WOS:000522862200005
281	J	King, GM; Gugerli, F; Fonti, P; Frank, DC	Tree growth response along an elevational gradient: climate or genetics?	OECOLOGIA	Article	Dendrochronology; Climate impact; Gene flow; Forest productivity; Alps	Environment and genetics combine to influence tree growth and should therefore be jointly considered when evaluating forest responses in a warming climate. Here, we combine dendroclimatology and population genetic approaches with the aim of attributing climatic influences on growth of European larch (Larix decidua) and Norway spruce (Picea abies). Increment cores and genomic DNA samples were coll…	2013	173	4	http://dx.doi.org/10.1007/s00442-013-2696-6	WOS:000328210000039
282	J	Plesa, IM; Al Hassan, M; González-Orenga, S; Sestras, AF; Vicente, O; Prohens, J; Boscaiu, M; Sestras, RE	Responses to Drought in Seedlings of European Larch (Larix decidua Mill.) from Several Carpathian Provenances	FORESTS	Article	antioxidants; larch provenances; photosynthetic pigments; potassium; proline	European larch (Larix decidua Mill.) has been reported either as more tolerant or as more sensitive to drought than conifers with perennial leaves. Previous studies have revealed that Carpathian populations of European larch display a high genetic variability. A comparative study of the responses of these populations to drought stress at the seedling stage might allow the identification of drough…	2019	10	6	http://dx.doi.org/10.3390/f10060511	WOS:000475305000051
283	J	Silva, JCE; Borralho, NMG; Wellendorf, H	Genetic parameter estimates for diameter growth, pilodyn penetration and spiral grain in <i>Picea abies</i> (L.) KARST.	SILVAE GENETICA	Article	Picea abies; open-pollination; controlled crosses; REML; heritability; genetic correlation; genotype by environment interaction	Univariate and multivariate Restricted Maximum Likelihood procedures were applied to estimate (co)variance components and related genetic parameters for diameter growth, pilodyn penetration and spiral grain in Picta abies. The data are fi om 15 to 18-year-old progeny tests, comprising cross- and open-pollinated families. Narrow-sense heritabilities ranged between 0.09 and 0.27 for diameter, 0.18 …	2000	49	1		WOS:000088072300006
284	J	Dobrowolska, D; Boncina, A; Klumpp, R	Ecology and silviculture of silver fir (<i>Abies alba</i> Mill.): a review	JOURNAL OF FOREST RESEARCH	Review	Management; mixed forests; genetics; structure; dynamics	Silver fir (Abies alba Mill.) is one of the most valuable conifer trees in Europe for historical and economic reasons. Growing interest in the species, along with the recognition that silver fir was subjected to inappropriate silvicultural measures during the 20th century due a lack of understanding of its ecology, have spurred recent studies from various disciplines which have yielded new insigh…	2017	22	6	http://dx.doi.org/10.1080/13416979.2017.1386021	WOS:000423297300002
285	J	Gerendiain, AZ; Peltola, H; Pulkkinen, P; Jaatinen, R; Pappinen, A; Kellomäki, S	Differences in growth and wood property traits in cloned Norway spruce (<i>Picea abies</i>)	CANADIAN JOURNAL OF FOREST RESEARCH	Article		Volume growth has typically been used as a selection trait of prime importance in forest tree breeding. Less attention has been given to the genetic or phenotypic relationships between the growth or yield and wood density traits. In the above context, we aimed to investigate the phenotypic relationships among different growth, yield, and wood density traits of 20 Norway spruce (Picea abies (L.) K…	2007	37	12	http://dx.doi.org/10.1139/X07-113	WOS:000253179200018
288	J	Sandak, J; Sandak, A; Cantini, C; Autino, A	Differences in wood properties of <i>Picea abies</i> L. Karst. in relation to site of provenance and population genetics	HOLZFORSCHUNG	Article	microsatellites; Norway spruce; wood properties; wood provenance	Chemical and physical characteristics of wood from six European populations of Picea abies were investigated taking into consideration their genetic differentiation determined by four microsatellites markers. The growth conditions of investigated spruce trees differed significantly. As a consequence, several adaptations were observed in samples from varying environments. The adaptation mechanisms…	2015	69	4	http://dx.doi.org/10.1515/hf-2014-0061	WOS:000353419400002
289	J	Wilkinson, SW; Dalen, LS; Skrautvol, TO; Ton, J; Krokene, P; Mageroy, MH	Transcriptomic changes during the establishment of long-term methyl jasmonate-induced resistance in Norway spruce	PLANT CELL AND ENVIRONMENT	Article	epigenetics; induced resistance; methyl jasmonate; phytohormones; Picea abies; transcriptome	Norway spruce (Picea abies) is an economically and ecologically important tree species that grows across northern and central Europe. Treating Norway spruce with jasmonate has long-lasting beneficial effects on tree resistance to damaging pests, such as the European spruce bark beetle Ips typographus and its fungal associates. The (epi)genetic mechanisms involved in such long-lasting jasmonate in…	2022	45	6	http://dx.doi.org/10.1111/pce.14320	WOS:000780734100001
290	J	Chybicki, IJ; Dzialuk, A	Bayesian approach reveals confounding effects of population size and seasonality on outcrossing rates in a fragmented subalpine conifer	TREE GENETICS & GENOMES	Article	Population fragmentation; Mating system; Biparental inbreeding; Pollen dispersal; Bayesian method; Pinus cembra	Mating systems have long been recognized as key factors determining genetic structure within and between populations. Outcrossing promotes genetic diversity and gene flow between populations, while inbreeding, on the other hand, decreases recombination rates, facilitating fixation of co-adapted genes. In small populations, selfing moderates pollen limitation because of low mate availability, but …	2014	10	6	http://dx.doi.org/10.1007/s11295-014-0792-3	WOS:000343924600017
291	J	Scotti, I; Paglia, G; Magni, F; Morgante, M	Population genetics of Norway spruce (<i>Picea abies</i> Karst.) at regional scale:: sensitivity of different microsatellite motif classes in detecting differentiation	ANNALS OF FOREST SCIENCE	Article	conifers; SSR; divergence; statistical testing; genetic distance	Four populations of Norway spruce (Picea abies Karst.) were screened using nine nuclear microsatellite markers (three trinucleotides and six dinucleotides) and four chloroplast markers (all mononucleotides). Marker classes were compared for their variability, mutation rate and ability to detect differentiation between stands. Dinucleotide markers proved to be the most variable group and chloropla…	2006	63	5	http://dx.doi.org/10.1051/forest:2006029	WOS:000240514800005
292	J	Larionova, AY; Semerikova, SA; Ekart, AK; Kravchenko, AN; Semerikov, VL; Polezhaeva, MA	Genetic Diversity, Structure, and Differentiation of <i>Picea abies</i>-<i>Picea obovata</i>-<i>Picea koraiensis</i> Species Complex according to Data of Chloroplast DNA Microsatellite Analysis	RUSSIAN JOURNAL OF GENETICS	Article	Picea abies; P. obovata; P. koraiensis; cpSSR; haplotype variability; population structure; genetic differentiation	The results of a comparative study of the genetic structure, parameters of intraspecific genetic diversity, and spatial differentiation of 35 populations of Picea abies-P. obovata-P. koraiensis species complex, located within the areas of distribution of "pure" species and in the contact zones of their ranges were presented. P. abies populations from Eastern Europe (Belarus, Poland); spruce popul…	2024	60	11	http://dx.doi.org/10.1134/S1022795424701047	WOS:001363924200014
293	J	Litkowiec, M; Lewandowski, A; Burczyk, J	Genetic status of Polish larch (<i>Larix decidua</i> subsp. <i>polonica</i> (Racib. Domin)) from Chelmowa Mountain: implications for gene conservation	DENDROBIOLOGY	Article	European larch; genetic diversity; microsatellites; spatial genetic structure	The Polish larch (Larix decidua subsp. polonica (Racib. Domin), a subspecies of European larch, is one of the most valuable forest-forming trees in Poland. It was first discovered on the Chelmowa Mountain where Natural Reserve has been established to protect this subspecies. Currently, this unique population is at risk of extinction. Nonetheless, the knowledge on the genetic diversity of this pop…	2018	80		http://dx.doi.org/10.12657/denbio.080.010	WOS:000456822300010
295	J	Meirmans, PG; Gros-Louis, MC; Lamothe, M; Perron, M; Bousquet, J; Isabel, N	Rates of spontaneous hybridization and hybrid recruitment in co-existing exotic and native mature larch populations	TREE GENETICS & GENOMES	Article	Larix laricina; Exotic larch; Genetic identification; Spontaneous hybridization; Offspring establishment	Exotic larch (Larix decidua Mill., Larix kaempferi (Lamb.) Carr. and Larix sibirica Ledeb.) and their hybrids have been introduced into Canada to test adaptation and growth for reforestation purposes. For tree breeding operations, provenance trials and seed orchards of exotic larches and their hybrids have been established in arboreta adjacent to natural forest stands of the indigenous species La…	2014	10	4	http://dx.doi.org/10.1007/s11295-014-0735-z	WOS:000339906200016
296	J	Wachowiak, W; Odrzykoski, I; Myczko, L; Prus-Glowacki, W	Lack of evidence on hybrid swarm in the sympatric population of <i>Pinus mugo</i> and <i>Pinus sylvestris</i>	FLORA	Article	hybridisation; reproductive barrier; cpDNA; allozymes; P. mugo; P. sylvestris	Natural hybridisation between the taxa from Pinus mugo complex and P. sylvestris was postulated in several sympatric populations of the species in Europe. However, due to the absence of precise methods for identification of hybrid seeds and hybrid trees, the frequency of hybridisation and its influence on the genetic structure of relict P. mugo populations has not been clarified so far. In the pr…	2006	201	4	http://dx.doi.org/10.1016/j.flora.2005.08.004	WOS:000238395400006
298	J	Raffl, H; Konrad, H; Curtu, AL; Geburek, T	Genetic evidence of human mediated, historical seed transfer from the Tyrolean Alps to the Romanian Carpathians in <i>Larix decidua</i> (Mill.) forests	ANNALS OF FOREST SCIENCE	Article	Genetic pollution; Genetic swamping; Intraspecific introgression; Microsatellites; Spatial genetic structure	Key messageHistoric transfer of larch from Alpine sources to Southern and Eastern Carpathians has been verified by means of nuclear genetic markers. Tyrolean populations can be differentiated into a north-western and south-eastern group, while Romanian populations are separated according to the Southern and Eastern Carpathians. Low-level introgression from Alpine sources is found in autochthonous…	2018	75	4	http://dx.doi.org/10.1007/s13595-018-0776-9	WOS:000450718700001
300	J	Budeanu, M; Sofletea, N	Stem and Crown Characteristics of Norway Spruce [<i>Picea abies</i> (L.) Karst] Populations from Romanian Carpathians	NOTULAE BOTANICAE HORTI AGROBOTANICI CLUJ-NAPOCA	Article	Carpathian forests; field trials; phenotypic and ecological correlations; Picea abies; tested seed sources	To establish the most important Norway spruce Romanian populations, open-pollinated progeny of ten plus trees originating from 33 seed stands mapped in the Romanian Carpathians have been evaluated for stem and crown characteristics at the age of 30 years, in two field trials: one established in their natural range (Bretcu trial), while the second was located outside of their natural range, in Sub…	2013	41	2		WOS:000328438300038
301	J	Szymura, TH	Differences in elemental composition of silver fir seedlings from four different populations in eastern Poland	FOREST ECOLOGY AND MANAGEMENT	Article	Abies alba; silver fir; chemical composition; nutrient balance; interpopulation variability	The aim of this paper was to investigate the interpopulation variability of the elemental composition of silver fir (Abies alba Mill.). Seedlings from seeds collected from four eastern Poland sites were cultivated under controlled conditions to eliminate variability caused by environmental conditions of places of their origin. Concentrations of Ca, Mg, Fe, Zn, and Mn in shoots with needles and ro…	2003	179	45717	http://dx.doi.org/10.1016/S0378-1127(02)00537-6	WOS:000183836300039
302	J	Heer, K; Ullrich, KK; Hiss, M; Liepelt, S; Brüning, RS; Zhou, JB; Opgenoorth, L; Rensing, SA	Detection of somatic epigenetic variation in Norway spruce via targeted bisulfite sequencing	ECOLOGY AND EVOLUTION	Article	acclimation; epigenetics; exome capture; gene body methylation; Picea abies	Epigenetic mechanisms represent a possible mechanism for achieving a rapid response of long-lived trees to changing environmental conditions. However, our knowledge on plant epigenetics is largely limited to a few model species. With increasing availability of genomic resources for many tree species, it is now possible to adopt approaches from model species that permit to obtain single-base pair …	2018	8	19	http://dx.doi.org/10.1002/ece3.4374	WOS:000448803000010
303	J	Isik, K; Kleinschmit, J; Steiner, W	Age-Age Correlations and Early Selection for Height in a Clonal Genetic Test of Norway Spruce	FOREST SCIENCE	Article	juvenile-mature correlations; genetic correlation; efficiency of selection; indirect selection; Picea abies	Heights of rooted cuttings from 40 clones of Norway spruce (Picea abies [L.] Karst) were measured at ages 3, 5, 8, 10, 13, and 17 from rooting at seven test environments in northern Germany. To determine the optimal age for juvenile selection for height, age-related changes in variance components, clone-mean heritability, and age age correlations were estimated. Partitions of variance components …	2010	56	2		WOS:000276590800008
304	J	Hussendörfer, E; Konnert, M	Investigations of genetic variation of silver fir (<i>Abies alba</i> Mill.) in uneven-aged forests ("Plenterwald") in comparison with even-aged forests ("Altersklassenwald")	FORSTWISSENSCHAFTLICHES CENTRALBLATT	Article	Abies alba; isoenzyme gene marker; in situ preservation; genetic variation; silviculture	This paper describes the investigation of genetic variation of silver fir within and among uneven-aged forests (Plenterwald) and even-aged forests (Altersklassenwald). In addition, genetic structures of adult trees and their natural regeneration were investigated as well as genetic structures between various developmental stages according to height layers within an uneven-aged forest. Genetic inv…	2000	119	4	http://dx.doi.org/10.1007/BF02769138	WOS:000088988200004
305	J	Budeanu, M; Sofletea, N; Parnuta, G	Testing Romanian seed sources of Norway spruce (<i>Picea abies</i>): results on growth traits and survival at age 30	ANNALS OF FOREST RESEARCH	Article	Picea abies; seed stands; genetic variability; quantitative traits; survival rate; Norway spruce	Growth traits and survival rate were evaluated in two field trials consisting of 33 provenances (seed stands) spread across the entire natural distribution range of Norway spruce in Romania. Total tree height, diameter at breast height (DBH) and survival rate were measured at 30 years after planting. Both growth and adaptation traits show substantial genetic variation among the tested seed stands…	2012	55	1		WOS:000305870000005
306	J	Matisons, R; Katrevics, J; Zeltins, P; Jansone, D; Jansons, A	The Environmental and Genetic Controls of Increment Suggest a Limited Adaptability of Native Populations of Norway Spruce to Weather Extremes	FORESTS	Article	Picea abies; heritability; weather-growth relationships; meteorological anomalies; local adaptation	In the Baltics, warming is expected to burden the growth of Norway spruce Picea abies, with weather anomalies/extremes having strong triggering effects, which can be mitigated by tree breeding. Within the region, breeding programmes have been aiming for productivity, yet being conservative, their sustainability depends on the adaptability of native genotypes, which is unclear. The adaptability of…	2024	15	1	http://dx.doi.org/10.3390/f15010015	WOS:001151941000001
308	J	Ipsen, A; Ziegenhagen, B	New insights into allelic diversity of a phospho<i>enol</i>pyruvate carboxylase in the conifer <i>Picea abies</i> (L.) Karst.	PLANTA	Article	allozyme variation; DNA full-length alleles; Exon/intron site variation; gene family (PEPC); Phosphoenolpyruvate carboxylase; Picea (PEPC)	Two genomic full-length alleles of a phosphoenolpyruvate carboxylase (PEPC; EC 4.1.1.31) were isolated and analysed in the gymnosperm Norway spruce [Picea abies (L.) Karst.]. Mendelian segregation analysis confirmed that the two alleles belong to the same DNA gene locus. Southern analysis was performed using exon and intron probes, separately. A small gene family was discovered when exon probes w…	2001	214	2	http://dx.doi.org/10.1007/s004250100614	WOS:000173200900013
309	J	Behringer, D; Zimmermann, H; Ziegenhagen, B; Liepelt, S	Differential Gene Expression Reveals Candidate Genes for Drought Stress Response in <i>Abies alba</i> (Pinaceae)	PLOS ONE	Article		Increasing drought periods as a result of global climate change pose a threat to many tree species by possibly outpacing their adaptive capabilities. Revealing the genetic basis of drought stress response is therefore implemental for future conservation strategies and risk assessment. Access to informative genomic regions is however challenging, especially for conifers, partially due to their lar…	2015	10	4	http://dx.doi.org/10.1371/journal.pone.0124564	WOS:000353711600093
310	J	Sonesson, J; Eriksson, G	Genetic variation in drought tolerance in <i>Picea abies</i> seedlings and its relationship to growth in controlled and field environments	SCANDINAVIAN JOURNAL OF FOREST RESEARCH	Article	biomass; early testing; juvenile-mature correlations; Norway spruce; phenology	Drought tolerance, phenology, height-growth and biomass were studied in 36 open-pollinated Picea abies families in a growth chamber over two growth periods. Three different irrigation treatments were applied: well-watered, periodic drought and lethal drought (involving watering during the first growth period and withholding water during the second). The periodic drought treatment yielded signific…	2003	18	1	http://dx.doi.org/10.1080/0891060310002282	WOS:000182535800009
311	J	Wachowiak, W; Boratynska, K; Cavers, S	Geographical patterns of nucleotide diversity and population differentiation in three closely related European pine species in the Pinus mugo complex	BOTANICAL JOURNAL OF THE LINNEAN SOCIETY	Article	adaptation; divergence; mtDNA variation; natural selection; speciation	Nucleotide polymorphism at 12 nuclear loci and two mitochondrial gene fragments was studied in three closely related pine species from the Pinus mugo complex in populations across the species distributional range in Europe. Despite large differences in the census sizes of the populations, high and similar levels of nucleotide diversity (sil=approximate to 0.0130.017) were found at nuclear loci in…	2013	172	2	http://dx.doi.org/10.1111/boj.12049	WOS:000319152700007
313	J	Berlin, M; Jansson, G; Högberg, KA	Genotype by environment interaction in the southern Swedish breeding population of <i>Picea abies</i> using new climatic indices	SCANDINAVIAN JOURNAL OF FOREST RESEARCH	Article	G x E; site-site genetic correlations; late spring frost; Norway spruce	Genotype-environment interaction (G x E) has a critical impact on the design of a breeding programme and the resulting genetic gains. The aim of this study was to assess the incidence and predictability of G x E with respect to growth traits in the breeding population of Picea abies (L.) Karst. in southern Sweden. We used across-site genetic correlations as a measure of G x E and multiple linear …	2015	30	2	http://dx.doi.org/10.1080/02827581.2014.978889	WOS:000350693100002
314	J	Steffenrem, A; Solheim, H; Skroppa, T	Genetic parameters for wood quality traits and resistance to the pathogens <i>Heterobasidion parviporum</i> and <i>Endoconidiophora polonica</i> in a Norway spruce breeding population	EUROPEAN JOURNAL OF FOREST RESEARCH	Article	Picea abies; Tree breeding; Heritability; Resistance; Heterobasidion; Endoconidiophora; Wood density; Spiral grain	The root rot pathogens in Norway spruce (Picea abies) Heterobasidion ssp. cause substantial loss in carbon sequestered in forest and economic revenue for forest owners. To facilitate strategic breeding planning for increased resistance against this pathogen in particular, the blue stain fungus Endoconidiophora polonica, growth and wood quality traits (wood density and spiral grain), we estimated …	2016	135	5	http://dx.doi.org/10.1007/s10342-016-0975-6	WOS:000384571700002
315	J	Liepelt, S; Cheddadi, R; de Beaulieu, JL; Fady, B; Gömöry, D; Hussendörfer, E; Konnert, M; Litt, T; Longauer, R; Terhürne-Berson, R; Ziegenhagen, B	Postglacial range expansion and its genetic imprints in <i>Abies alba</i> (Mill.) - A synthesis from palaeobotanic and genetic data	REVIEW OF PALAEOBOTANY AND PALYNOLOGY	Article	Abies; Central Europe; multiple refugia; palynology; macroremains; DNA markers; allozymes; genetic diversity	We present a range-wide synthesis of our own research and related work on the complex postglacial history of Abies alba Mill. It is based on macroremains, fossil pollen records as well as on different genetic markers. The geographic distribution of genetic lineages and allele frequencies together with the fossil records confirm multiple refugia with at least three of them being sources for the Ho…	2009	153	45689	http://dx.doi.org/10.1016/j.revpalbo.2008.07.007	WOS:000261990000012
316	J	Caré, O; Müller, M; Vornam, B; Höltken, AM; Kahlert, K; Krutovsky, KV; Gailing, O; Leinemann, L	High Morphological Differentiation in Crown Architecture Contrasts with Low Population Genetic Structure of German Norway Spruce Stands	FORESTS	Article	Picea abies; microsatellites; crown architecture; morphology; phenotypic adaptation; genetic differentiation	High elevation sites in the low mountain ranges in Germany are naturally covered by Norway spruce (Picea abies (Karst.) L.) stands. Historically, large scale anthropogenic range expansion starting in the mid to late 18th century had a huge impact on the forest composition throughout Germany. Utilisation and exploitation often led to artificial regeneration, mostly carried out using seeds from all…	2018	9	12	http://dx.doi.org/10.3390/f9120752	WOS:000455069600024
317	J	Gros-Louis, MC; Bousquet, J; Pâques, LE; Isabel, N	Species-diagnostic markers in <i>Larix</i> spp. based on RAM and nuclear, cpDNA, and mtDNA gene sequences, and their phylogenetic implications	TREE GENETICS & GENOMES	Article	ESTP; hybrids; Larix; genetic identity; genetic fingerprint; cpDNA; mtDNA; phylogeny; RAPD	Genetic markers from the nuclear, chloroplast, and mitochondrial genomes were developed to distinguish unambiguously among four larch species [Larix laricina (Du Roi) K. Koch, Larix decidua (Mill.), Larix kaempferi (Lamb.) Sarg., and Larix sibirica (Ledeb.)] used in intensive forestry in eastern North America. Nine random amplified polymorphic DNA (RAPD) fragments had good diagnostic value, and 3…	2005	1	2	http://dx.doi.org/10.1007/s11295-005-0007-z	WOS:000244896000002
318	J	Tollefsrud, MM; Sonstebo, JH; Brochmann, C; Johnsen, O; Skroppa, T; Vendramin, GG	Combined analysis of nuclear and mitochondrial markers provide new insight into the genetic structure of North European <i>Picea abies</i>	HEREDITY	Article	Picea abies; nuclear microsatellites; phylogeography; postglacial recolonization; landscape shape interpolation; peripheral populations	Norway spruce of northern Europe expanded at the end of the last glacial out of one refugium in Russia. To provide a detailed insight into how the genetic structure in the northern European lineage of this species has been shaped by postglacial migration, recurrent pollen flow and marginality, we here compare variation at seven highly variable nuclear microsatellite loci in 37 populations (1715 t…	2009	102	6	http://dx.doi.org/10.1038/hdy.2009.16	WOS:000266199100005
319	J	Gömöry, D; Longauer, R; Paule, L; Krajmerová, D; Schmidtová, J	Across-species patterns of genetic variation in forest trees of Central Europe	BIODIVERSITY AND CONSERVATION	Article	Picea abies; Abies alba; Fagus sylvatica; Quercus petraea; Allelic richness; Diversity; Differentiation; Conservation	The study focuses on geographical patterns of genetic variation at allozyme loci common for four main tree species of Central Europe (Norway spruce, silver fir, common beech and sessile oak). Moving-window averaging of four indicators of allelic richness and diversity (proportion of polymorphic loci, mean number of alleles per locus, effective number of alleles and expected heterozygosity) with w…	2010	19	7	http://dx.doi.org/10.1007/s10531-010-9823-z	WOS:000278110900013
320	J	Petrova, EA; Goroshkevich, SN; Belokon, MM; Belokon, YS; Politov, DV	Distribution of the genetic diversity of the Siberian stone pine, <i>Pinus sibirica</i> Du Tour, along the latitudinal and longitudinal profiles	RUSSIAN JOURNAL OF GENETICS	Article		The Siberian stone pine (Pinus sibirica Du Tour) is one of the main forest-forming coniferous species of the boreal ecosystems of Western Siberia. We used the isozyme method to analyze 11 ecotypes representing the latitudinal and longitudinal profiles within the species range, including samples from the geographic boundaries of the distribution. The genetic structure of the ecotypes is described …	2014	50	5	http://dx.doi.org/10.1134/S102279541405010X	WOS:000336808900005
321	J	Avanzi, C; Vitali, A; Piovani, P; Spanu, I; Urbinati, C; Vendramin, GG; Garbarino, M; Piotti, A	Genetic consequences of landscape features in two rear edge, highly fragmented metapopulations of a mediterranean conifer	LANDSCAPE ECOLOGY	Article	Habitat fragmentation; Genetic diversity; Landscape genetics; Marginal populations; Metapopulation ecology; Abies alba	Context Habitat fragmentation is expected to erode genetic diversity, which instead needs to be preserved for promoting species adaptation to a changing climate. As this expectation has found mixed support in forest trees, consistent results on the genetic consequences of fragmentation requires adequately replicated experimental designs, as well as an explicit assessment of which landscape featur…	2024	39	4	http://dx.doi.org/10.1007/s10980-024-01887-z	WOS:001199186300001
323	J	Budeanu, M; Apostol, EN; Besliu, E; Crisan, VE; Petritan, AM	Phenotypic Variability and Differences in the Drought Response of Norway Spruce <i>Pendula</i> and <i>Pyramidalis</i> Half-Sib Families	FORESTS	Article	breeding strategy; climate change; genetic gain; radial increments; Picea abies; wood characteristics	In a changing climate, forest managers need to select productive and climate-change-resilient tree species and provenances. Therefore, assessing the growth response of provenances growing in field trials to climate provides useful information for identifying the more appropriate provenance or variety. To determine the genetic gain through selection of the most productive and resilient families an…	2021	12	7	http://dx.doi.org/10.3390/f12070947	WOS:000676547500001
324	J	Babushkina, EA; Vaganov, EA; Grachev, AM; Oreshkova, NV; Belokopytova, LV; Kostyakova, TV; Krutovsky, KV	The effect of individual genetic heterozygosity on general homeostasis, heterosis and resilience in Siberian larch (<i>Larix</i> <i>sibirica</i> Ledeb.) using dendrochronology and microsatellite loci genotyping	DENDROCHRONOLOGIA	Article	Dendrochronology; Tree ring width; Radial growth; Individual heterozygosity; Microsatellite markers; Heterosis; Homeostasis; Climate change; Environmental stress	The genetic mechanisms underlying the relationship of individual heterozygosity (IndHet) with heterosis and homeostasis are not fully understood. Such an understanding, however, would have enormous value as it could be used to identify trees better adapted to environmental stress. Dendrochronology data, in particular the individual average radial increment growth of wood measured as the average t…	2016	38		http://dx.doi.org/10.1016/j.dendro.2016.02.005	WOS:000386867500004
325	J	Mottet, MJ; DeBlois, J; Perron, M	High genetic variation and moderate to high values for genetic parameters of <i>Picea abies</i> resistance to <i>Pissodes strobi</i>	TREE GENETICS & GENOMES	Article	Pest resistance; Norway spruce; White pine weevil; Tree breeding; GCA; SCA; Heritability; Genetic correlation	Genetic parameters of Picea abies resistance to the white pine weevil (Pissodes strobi Peck) were estimated from 193 full-sib and 166 half-sib families in six 10-year-old progeny trials. The estimated family and individual heritability values for the cumulative weevil attack rate between ages 6 and 10 (CWA(6-10)) were high and moderate for both full-sib families (0.61 and 0.28, respectively) and …	2015	11	3	http://dx.doi.org/10.1007/s11295-015-0878-6	WOS:000355704700026
326	J	Högberg, KA; Berlin, M; Helmersson, A; Jansson, G	Early nursery tests can lead to substantial genetic gain in Norway spruce field performance	SCANDINAVIAN JOURNAL OF FOREST RESEARCH	Article	cutting propagation; early selection; non-additive effects; Picea abies; tree improvement; selection response	The effects of early selection in a nursery on field performance were studied in an experiment comprising 2665 cutting-propagated clones of Picea abies (L.) Karst, deriving from 151 half-sib families. The clones were selected from 13,050 seedlings that were evaluated genetically using a randomized block design and measurements of height and growth rhythm in the nursery. The selected clones were a…	2020	35	8	http://dx.doi.org/10.1080/02827581.2020.1839126	WOS:000586132700001
327	J	Teodosiu, M; Botezatu, A; Ciocirlan, E; Mihai, G	Variation of Cones Production in a Silver Fir (<i>Abies alba</i> Mill.) Clonal Seed Orchard	FORESTS	Article	cone production variation; zero-inflated; Markov chain Monte Carlo (MCMC); seed orchard management; South-Eastern Europe	The current study is the first to describe fertility dynamics in a Silver fir (Abies alba Mill.) seed orchard and among the few reporting related information from a mature seed orchard. The research aim was to evaluate the female cone production in order to provide support to future management measures. Observations were conducted in a clonal seed orchard from the Eastern Carpathians over six yea…	2023	14	1	http://dx.doi.org/10.3390/f14010017	WOS:000917615600001
329	J	Sagnard, F; Oddou-Muratorio, S; Pichot, C; Vendramin, GG; Fady, B	Effects of seed dispersal, adult tree and seedling density on the spatial genetic structure of regeneration at fine temporal and spatial scales	TREE GENETICS & GENOMES	Article	Seed dispersal; Spatial genetic structure; Density; Demography; Temperate forest trees; Forest dynamics; Abies alba	Several demographic factors can produce family structured patches within natural plant populations, particularly limited seed and pollen dispersal and small effective density. In this paper, we used computer simulations to examine how seed dispersal, density, and spatial distribution of adult trees and seedlings can explain the spatial genetic structure (SGS) of natural regeneration after a singl…	2011	7	1	http://dx.doi.org/10.1007/s11295-010-0313-y	WOS:000286462800004
330	J	Konôpková, A; Krajmerová, D; Kurjak, D; Kmet, J; Psidová, E; Kucerová, J; Hrivnák, M; Longauer, R; Ditmarová, L; Gömöry, D	Nucleotide polymorphisms associated with climate and physiological traits in silver fir (<i>Abies alba</i> Mill.) provenances	FLORA	Article	Provenance research; Single nucleotide polymorphism; Intraspecific variability; Genetic variation; Phenotypic variation; Association mapping	Single-nucleotide polymorphisms in seven candidate genes for drought and heat tolerance identified in earlier studies were studied in 13 populations of Abies alba Mill. covering the eastern and southeastern half of the distribution range. Trees were planted in a provenance trial plot of the international experiment IUFRO 2005 in Hertnik, Slovakia. In parallel, genotyped trees were also scored for…	2019	250		http://dx.doi.org/10.1016/j.flora.2018.11.012	WOS:000455038200005
331	J	Milesi, P; Berlin, M; Chen, J; Orsucci, M; Li, LL; Jansson, G; Karlsson, B; Lascoux, M	Assessing the potential for assisted gene flow using past introduction of Norway spruce in southern Sweden: Local adaptation and genetic basis of quantitative traits in trees	EVOLUTIONARY APPLICATIONS	Article	assisted gene flow; breeding strategy; climate change; exome capture; Picea abies; quantitative traits architecture	Norway spruce (Picea abies) is a dominant conifer species of major economic importance in northern Europe. Extensive breeding programs were established to improve phenotypic traits of economic interest. In southern Sweden, seeds used to create progeny tests were collected on about 3,000 trees of outstanding phenotype ('plus' trees) across the region. In a companion paper, we showed that some were…	2019	12	10	http://dx.doi.org/10.1111/eva.12855	WOS:000493919200007
332	J	García-García, I; Méndez-Cea, B; de Andrés, EG; Gazol, A; Sanchez-Salguero, R; Manso-Martínez, D; Horreo, JL; Camarero, JJ; Linares, JC; Gallego, FJ	Climate and Soil Microsite Conditions Determine Local Adaptation in Declining Silver Fir Forests	PLANTS-BASEL	Article	Abies alba; climate warming; forest die-off; ddRADseq; SNPs; dendroecology; soil nutrients; soil microbiome; PLFAs	Ongoing climatic change is threatening the survival of drought-sensitive tree species, such as silver fir (Abies alba). Drought-induced dieback had been previously explored in this conifer, although the role played by tree-level genetic diversity and its relationship with growth patterns and soil microsite conditions remained elusive. We used double digest restriction-site-associated DNA sequenci…	2023	12	14	http://dx.doi.org/10.3390/plants12142607	WOS:001038914500001
333	J	Tollefsrud, MM; Kissling, R; Gugerli, F; Johnsen, O; Skroppa, T; Cheddadi, R; van Der Knaap, WO; Latalowa, M; Terhürne-Berson, R; Litt, T; Geburek, T; Brochmann, C; Sperisen, C	Genetic consequences of glacial survival and postglacial colonization in Norway spruce:: combined analysis of mitochondrial DNA and fossil pollen	MOLECULAR ECOLOGY	Article	fossil pollen; glacial refugia; minisatellite; Picea abies; plant mtDNA; range expansion	Norway spruce (Picea abies [L.] Karst.) is a broadly distributed European conifer tree whose history has been intensively studied by means of fossil records to infer the location of full-glacial refugia and the main routes of postglacial colonization. Here we use recently compiled fossil pollen data as a template to examine how past demographic events have influenced the species' modern genetic d…	2008	17	18	http://dx.doi.org/10.1111/j.1365-294X.2008.03893.x	WOS:000259152900014
334	J	Chen, ZQ; Harry, BK; Wu, HX	Patterns of additive genotype-by-environment interaction in tree height of Norway spruce in southern and central Sweden	TREE GENETICS & GENOMES	Article	Picea abies; Factor analysis; MET; Cluster analysis; G x E interaction	Genotype-by-environment (G x E) interaction for tree height measured at ages 7 to 13 was investigated in 20 large open-pollinated progeny trials for Norway spruce (Picea abies (L.) H. Karst.) in southern and central Sweden. Factor analytic method using spatially adjusted data and a reduced animal model was used to explore the pattern of G x E interaction. Extended factor analyses captured 93.0% o…	2017	13	1	http://dx.doi.org/10.1007/s11295-017-1103-6	WOS:000397239600025
335	J	Mari, S; Jonsson, A; Finlay, R; Ericsson, T; Kähr, M; Eriksson, G	Genetic variation in nitrogen uptake and growth in mycorrhizal and nonmycorrhizal <i>Picea abies</i> (L.) Karst. seedlings	FOREST SCIENCE	Article	Laccaria bicolor; additive variance; genetic correlations; Norway spruce	The purpose of this study was to estimate genetic variation in nitrogen uptake and growth of mycorrhizal and nonmycorrhizal seedlings from 30 open-pollinated families of Norway spruce (Picea abies), at two levels of nitrogen (N) supply. Six-week-old seedlings were transplanted into 1.7 L pots filled with pumice, and one-half of them was inoculated with the ectomycorrhizal symbiont Laccaria bicolo…	2003	49	2		WOS:000182096700009
336	J	Li, LL; Milesi, P; Tiret, M; Chen, J; Sendrowski, J; Baison, J; Chen, ZQ; Zhou, LH; Karlsson, B; Berlin, M; Westin, J; Garcia-Gil, MR; Wu, HX; Lascoux, M	Teasing apart the joint effect of demography and natural selection in the birth of a contact zone	NEW PHYTOLOGIST	Article	climate change; contact zone; demography; Last Glacial Maximum; local adaptation; natural selection; Picea abies	Vast population movements induced by recurrent climatic cycles have shaped the genetic structure of plant species. During glacial periods species were confined to low-latitude refugia from which they recolonized higher latitudes as the climate improved. This multipronged recolonization led to many lineages that later met and formed large contact zones. We utilize genomic data from 5000 Picea abie…	2022	236	5	http://dx.doi.org/10.1111/nph.18480	WOS:000861973200001
337	J	Trujillo-Moya, C; George, JP; Fluch, S; Geburek, T; Grabner, M; Karanitsch-Ackerl, S; Konrad, H; Mayer, K; Sehr, EM; Wischnitzki, E; Schueler, S	Drought Sensitivity of Norway Spruce at the Species' Warmest Fringe: Quantitative and Molecular Analysis Reveals High Genetic Variation Among and Within Provenances	G3-GENES GENOMES GENETICS	Review	drought tolerance; Picea abies; wood anatomy; xylem; genetic association; single nucleotide polymorphism; repeatability	Norway spruce (Picea abies) is by far the most important timber species in Europe, but its outstanding role in future forests is jeopardized by its high sensitivity to drought. We analyzed drought response of Norway spruce at the warmest fringe of its natural range. Based on a 35-year old provenance experiment we tested for genetic variation among and within seed provenances across consecutively …	2018	8	4	http://dx.doi.org/10.1534/g3.117.300524	WOS:000428693600014
339	C	Brancheriau, L; Ghodrati, A; Gallet, P; Thaunay, P; Lasaygues, P	Application of ultrasonic tomography to characterize the mechanical state of standing trees (<i>Picea abies</i>)	10TH ANGLO-FRENCH PHYSICAL ACOUSTICS CONFERENCE (AFPAC 2011)	Proceedings Paper		Wood is a biological growth medium. It is orthotropic with longitudinal, radial and tangential axes. Furthermore, standing trees adapt themselves to environmental growth conditions, and their material properties vary with age. These changes result in variations that are much more complex than anisotropy. Studying wood quality and intraspecific variability is useful for clonal selection and for th…	2012	353		http://dx.doi.org/10.1088/1742-6596/353/1/012007	WOS:000304983700007
340	J	Himanen, K; Helenius, P; Ylioja, T; Nygren, M	Intracone variation explains most of the variance in <i>Picea abies</i> seed weight: implications for seed sorting	CANADIAN JOURNAL OF FOREST RESEARCH	Article	cone insect; Norway spruce; radiography; seed orchard; stand seed	Norway spruce (Picea abies (L.) Karst.) seed is collected from both forest stands after final felling and from seed orchards. To produce high-germinability seed lots that are easy to use in nursery sowing machines, empty, insect-damaged, and other poor-quality seeds are culled. Sorting is done typically by weight or size. Previous studies of conifer seed have indicated wide variation in seed weig…	2016	46	4	http://dx.doi.org/10.1139/cjfr-2015-0379	WOS:000375945800004
341	J	Egbäck, S; Karlsson, B; Högberg, KA; Nyström, K; Liziniewicz, M; Nilsson, U	Effects of phenotypic selection on height-diameter ratio of Norway spruce and Scots pine in Sweden	SILVA FENNICA	Article	genetic selection; genetic correlations; slenderness; heritability; Picea abies; Pinus sylvestris	Genetically improved Norway spruce (Picea abies (L.) Karst.) and Scots pine (Pinus sylvestris L.) are extensively used in operational Swedish forestry plantations. However, relatively little is known about the stein slenderness (height-diameter ratio) of genetically improved material. Thus, in this study we investigated effects of plus-tree selection on stem slenderness of Norway spruce and Scots…	2018	52	2	http://dx.doi.org/10.14214/sf.7738	WOS:000431568300011
342	J	Durodola, B; Hanstroem, N; Blumenstein, K; Haapanen, M; Hantula, J; Kashif, M; Piri, T; Terhonen, E	Leucoanthocyanidin Reductase 3 (<i>PaLAR3</i>) Locus in Norway Spruce (<i>Picea abies</i>) and Its Link to Resistance Against <i>Heterobasidion parviporum</i>	FOREST PATHOLOGY	Article	molecular marker; root rot; tree breeding	Heterobasidion parviporum is a fungal pathogen that is drastically damaging Norway spruce (Picea abies) in Europe. The infections will result in root and stem rot, causing significant economic losses for forest owners. Previous studies have shown that the PaLAR3 gene, which encodes the leucoanthocyanidin reductase enzyme, can increase resistance to H. parviporum in Norway spruce. The presence of …	2024	54	5	http://dx.doi.org/10.1111/efp.12889	WOS:001331439900001
343	J	Semerikov, VL; Semerikova, SA; Polezhaeva, MA; Kosintsev, PA; Lascoux, M	Southern montane populations did not contribute to the recolonization of West Siberian Plain by Siberian larch (<i>Larix sibirica</i>): a range-wide analysis of cytoplasmic markers	MOLECULAR ECOLOGY	Article	biogeography; cpDNA; glacial refugia; Larix; mtDNA; West Siberia	While many species were confined to southern latitudes during the last glaciations, there has lately been mounting evidence that some of the most cold-tolerant species were actually able to survive close to the ice sheets. The contribution of these higher latitude outposts to the main recolonization thrust remains, however, untested. In the present study, we use the first range-wide survey of gen…	2013	22	19	http://dx.doi.org/10.1111/mec.12433	WOS:000324931300010
344	J	Senior, JK; Iason, GR; Gundale, M; Whitham, TG; Axelsson, EP	Genetic increases in growth do not lead to trade-offs with ecologically important litter and fine root traits in Norway spruce	FOREST ECOLOGY AND MANAGEMENT	Article	Chemical and morphological traits; Intraspecific variation; Fine root; Litter; Picea abies	The genetic composition of many forests across the world is being altered through the introduction of genetic material selected and bred for superior production qualities. Growth strategy and allocation theories predict that introducing genetic material with faster growth rates into managed forest populations could result in tradeoffs that influence the expression of other traits of ecological im…	2019	446		http://dx.doi.org/10.1016/j.foreco.2019.05.021	WOS:000473376700006
345	J	Morar, IM; Dan, CTLA; Sestras, RE; Stoian-Dod, RL; Truta, AM; Sestras, AF; Sestras, P	Evaluation of Different Geographic Provenances of Silver Fir (<i>Abies alba</i>) as Seed Sources, Based on Seed Traits and Germination	FORESTS	Article	conifers; diversity; genetic resource; germination capacity; local populations	The evaluation of the diversity of silver fir (Abies alba Mill.) populations and the reproductive traits of the trees are of great importance for the conservation of genetic resources and forest management. Therefore, important reproductive characteristics of A. alba from seven Romanian provenances, considered as different geographical populations, were evaluated. Significant differences between …	2023	14	11	http://dx.doi.org/10.3390/f14112186	WOS:001116452000001
346	J	Blada, I; Popescu, F	Swiss stone pine provenance experiment in Romania: II. variation in growth and branching traits to age 14	SILVAE GENETICA	Article	Pinus cembra; Swiss stone pine; provenance trial; genetic variation; growth traits; branching; age-age correlation; early selection; indirect selection	After the nursery testing, twelve Swiss stone pine (Pinus cembra L.) provenances from the Alps and Carpathian Mountains were planted out at two sites located at high elevation in the Southern and Northern Carpathians. Total height growth (H), annual height growth (h), root collar diameter (RCD), branches per whorl (BW) and survival (SV) were measured and analyzed. Analysis of variance showed high…	2007	56	45750	http://dx.doi.org/10.1515/sg-2007-0023	WOS:000248415100009
347	J	Elfstrand, M; Zhou, LH; Baison, J; Olson, Å; Lundén, K; Karlsson, B; Wu, HX; Stenlid, J; García-Gil, MR	Genotypic variation in Norway spruce correlates to fungal communities in vegetative buds	MOLECULAR ECOLOGY	Article	cherry spruce rust; peroxidase; phenology; Picea abies; Rhizosphaera kalkhoffii; Sydowia polyspora	The taxonomically diverse phyllosphere fungi inhabit leaves of plants. Thus, apart from the fungi's dispersal capacities and environmental factors, the assembly of the phyllosphere community associated with a given host plant depends on factors encoded by the host's genome. The host genetic factors and their influence on the assembly of phyllosphere communities under natural conditions are poorly…	2020	29	1	http://dx.doi.org/10.1111/mec.15314	WOS:000501558700001
348	J	Swedjemark, G; Karlsson, B	Genotypic variation in susceptibility following artificial <i>Heterobasidion annosum</i> inoculation of <i>Picea abies</i> clones in a 17-year-old field test	SCANDINAVIAN JOURNAL OF FOREST RESEARCH	Article	deep stem inoculation; genetic variation; Heterobasidion parviporum; Norway spruce clones; resistance; root rot	Deep stem inoculations with Heterobasidion annosum (Fr.) Bref. were conducted on 34 clones (five to nine rametes) in a 17-yr-old Norway spruce [Picea abies (L.) Karst.] field trial in southern Sweden. A hole (one-third of the stem diameter) was made and filled with H. annosum-infected sawdust. Eight months later the trees were felled and the stems were sliced into 5-cm-thick discs, 2 m upwards fr…	2004	19	2	http://dx.doi.org/10.1080/02827580310018032	WOS:000220748000001
349	J	Larsson, H; De Paoli, E; Morgante, M; Lascoux, M; Gyllenstrand, N	The Hypomethylated Partial Restriction (HMPR) method reduces the repetitive content of genomic libraries in Norway spruce (<i>Picea abies</i>)	TREE GENETICS & GENOMES	Article	HMPR libraries; Reduced representation; Picea	To evaluate the usefulness of Reduced Representation Libraries (RRL) in species with large and highly repetitive genomes such as conifers, we employed Hypomethylated Partial Restriction (HMPR) on the genome of Norway spruce (Picea abies). The HMPR method preferentially removes the commonly hypermethylated, repetitive fraction of the genome. Hence, RRLs should be enriched for the hypomethylated ge…	2013	9	2	http://dx.doi.org/10.1007/s11295-012-0582-8	WOS:000316366200023
350	J	Singh, VV; Naseer, A; Sellamuthu, G; Jakus, R	An Optimized and Cost-Effective RNA Extraction Method for Secondary Metabolite-Enriched Tissues of Norway Spruce (<i>Picea abies</i>)	PLANTS-BASEL	Article	RNA extraction kits; TRIzol; CTAB; nanodrop; RNA integrity; phenolic content; RNA-Seq	Since the development of next-generation sequencing techniques and with the growing interest in transcriptomic studies, there is a demand for high-throughput RNA extraction techniques. General RNA extraction protocols are unreliable when it comes to the quality and quantity of isolated RNA obtained from different tissue types of different plant species. Despite Norway spruce (Picea abies) being o…	2024	13	3	http://dx.doi.org/10.3390/plants13030389	WOS:001161427100001
351	J	Puizina, J; Sviben, T; Krajacic-Sokol, I; Zoldos-Pecnik, V; Siljak-Yakovlev, S; Papes, D; Besendorfer, V	Cytogenetic and molecular characterization of the <i>Abies alb</i>a genome and its relationship with other members of the Pinaceae	PLANT BIOLOGY	Article	18S-5.8S-26S and 5S rDNA; fluorescence in situ hybridization; fluorochrome banding; internal transcribed spacer; nuclear DNA content; silver fir; telomeric repeats	Genome size, karyotype structure, heterochromatin distribution, position and number of ribosomal genes, as well as the ITS2 sequence of the internal transcribed spacer (ITS) were analysed in silver fir (Abies alba Mill.). The analysis also included characterization of the Arabidopsis-type of telomeric repeats in silver fir and in related species. The results were compared with results from other …	2008	10	2	http://dx.doi.org/10.1111/j.1438-8677.2007.00018.x	WOS:000253636800010
352	J	Rodriguez, YP; Morales, L; Willför, S; Pulkkinen, P; Peltola, H; Pappinen, A	Wood decay caused by <i>Heterobasidion parviporum</i> in juvenile wood specimens from normal- and narrow-crowned Norway spruce	SCANDINAVIAN JOURNAL OF FOREST RESEARCH	Article	Crown type; Heterobasidion parviporum; Picea abies; weight loss; wood density; wood extractives	Heterobasidion parviporum (Fr.) Niemela & Korhonen is a serious forest pathogen affecting the quality of Norway spruce (Picea abies (L.) Karst), especially in northern hemisphere. Here, we studied the wood decay caused by this pathogen in small wood specimens of 19-year-old normal (P. abies) and narrow crowned (P. abies f. pendula) Norway spruce trees. After six months of incubation, wood specime…	2013	28	4	http://dx.doi.org/10.1080/02827581.2012.746387	WOS:000318151700003
353	J	Vendramin, GG; Anzidei, M; Madaghiele, A; Sperisen, C; Bucci, G	Chloroplast microsatellite analysis reveals the presence of population subdivision in Norway spruce (<i>Picea abies</i> K.)	GENOME	Article	haplotypic diversity; phylogeography; chloroplast microsatellites; recolonization	Three chloroplast microsatellites (cpSSRs), previously sequence characterized and for which paternal inheritance was tested and confirmed, were used to assess their usefulness as informative markers for phylogeographic studies in Norway spruce (Picea abies K.) and to detect spatial genetic differentiation related to the possible recolonization processes in the postglacial period. Ninety-seven pop…	2000	43	1	http://dx.doi.org/10.1139/gen-43-1-68	WOS:000085083600010
354	J	Martínez-Sancho, E; Rellstab, C; Guillaume, F; Bigler, C; Fonti, P; Wohlgemuth, T; Vitasse, Y	Post-glacial re-colonization and natural selection have shaped growth responses of silver fir across Europe	SCIENCE OF THE TOTAL ENVIRONMENT	Article	Abies alba; Common garden experiment; Dendrochronology; Neutral genetics; Local adaptation; Tree rings	Warmer climate and more frequent extreme droughts will posemajor threats to forest ecosystems. Past demography processes due to post-glacial recolonization and adaptation to local environmental conditions are among themain contributors to genetic differentiation processes among provenances. Assessing the intra-specific variability of tree growth responses to such changes is crucial to explore a s…	2021	779		http://dx.doi.org/10.1016/j.scitotenv.2021.146393	WOS:000655687200009
355	J	Belokon, MM; Belokon, YS; Politov, DV; Altukhov, YP	Allozyme polymorphism of Swiss stone pine <i>Pinus cembra</i> L. in mountain populations of the Alps and the Eastern Carpathians	RUSSIAN JOURNAL OF GENETICS	Article		Swiss stone pine Pinus cembra L. is a species with fragmented range, occurring in the Alpine-East Carpathian mountain system. Seeds of P. cembra are dispersed by nutcrackers, which offers potential possibilities for gene exchange among populations. Using isozyme analysis, we have examined five samples from two parts of the Swiss stone pine range: the Alps (Switzerland and Austria) and the Carpath…	2005	41	11	http://dx.doi.org/10.1007/s11177-005-0228-0	WOS:000234424300011
357	J	Bednárová, E; Kucera, J	Phenological observations of two spruce stands (<i>Picea abies</i> [L.] Karst.) of different age in the years 1991-2000	EKOLOGIA-BRATISLAVA	Article	spruce; budbreak; phenological phases; shoot; soil; air; weather	Phenological phases at forest tree species arc distinctly periodic, but their onset and duration depend considerably on the course of a whole complex of environmental conditions, above all on the weather. In the presented study there is a comparison of the onset and duration of phenological phases at two forest stands of Picea abies [L.] K a r s t. of different age on the same site, as well as th…	2002	21			WOS:000177530100008
358	J	Klisz, M; Koprowski, M; Ukalska, J; Nabais, C	Does the Genotype Have a Significant Effect on the Formation of Infra-Annual Density Fluctuations? A Case Study Using <i>Larix</i> <i>decidua</i> from Northern Poland	FRONTIERS IN PLANT SCIENCE	Article	IADF; genetics; G x E; European larch; generalized estimating equations; wood density	Intra-annual density fluctuations (IADFs) can imprint environmental conditions within the growing season and most of the research on IADFs has been focused on their climatic signal. However, to our knowledge, the genetic influence on the frequency and type of IADFs has not been evaluated. To understand if the genotype can affect the formation of IADFs we have used a common garden experiment using…	2016	7		http://dx.doi.org/10.3389/fpls.2016.00691	WOS:000376152900001
359	J	Krejza, J; Svetlík, J; Pokorny, R	Spatially explicit basal area growth of Norway spruce	TREES-STRUCTURE AND FUNCTION	Article	Competition; Social area; Weighted Voronoi polygons; Increment; Picea abies	Presented Models describe the current growth rate. These models are good tools for growth prediction in the near future and will be compareable with further models; they will demonstrate the Norway spruce growth changes considering the climate change. Tree growth depends on genetic, climatic, microsite conditions and stand structure variations. A new evaluation method was carried out for studying…	2015	29	5	http://dx.doi.org/10.1007/s00468-015-1236-x	WOS:000361429500021
360	J	Vajana, E; Andrello, M; Avanzi, C; Bagnoli, F; Vendramin, GG; Piotti, A	Spatial conservation planning of forest genetic resources in a Mediterranean multi-refugial area	BIOLOGICAL CONSERVATION	Article	Spatial conservation planning; Forest genetic resources; Intraspecific genetic diversity; Abies alba; Pinus heldreichii; Quercus robur	The Kunming-Montreal Global Biodiversity Framework recognised the urgency of taking action to conserve intraspecific genetic diversity (IGD) as an insurance against habitat degradation and environmental change. Recent work suggests that 90-99 % of IGD should be conserved to safeguard viability of future generations. Here, we addressed such a conservation issue in three forest tree species in Ital…	2024	293		http://dx.doi.org/10.1016/j.biocon.2024.110599	WOS:001234865100001
361	J	Mihai, G; Alexandru, AM; Stoica, E; Birsan, MV	Intraspecific Growth Response to Drought of <i>Abies alba</i> in the Southeastern Carpathians	FORESTS	Article	silver fir; radial growth; wood characteristics; drought response; climate change	The intensity and frequency of drought have increased considerably during the last decades in southeastern Europe, and projected scenarios suggest that southern and central Europe will be affected by more drought events by the end of the 21st century. In this context, assessing the intraspecific genetic variation of forest tree species and identifying populations expected to be best adapted to fu…	2021	12	4	http://dx.doi.org/10.3390/f12040387	WOS:000643037600001
362	J	Björkman, C	Interactive effects of host resistance and drought stress on the performance of a gall-making aphid living on Norway spruce	OECOLOGIA	Article	Adelges abietis; Picea abies; feeding mode; environmental change; phenolics	Four full-sib families of Norway spruce (Picea abies), of which two were resistant to a galling aphid (Adelges abietis) and two were susceptible, were exposed to drought stress for 2 years. The primary aim was to test the hypothesis that the various life stages of the aphid differ in their response to environmentally induced changes in the host plant. The drought treatment had a significant negat…	2000	123	2	http://dx.doi.org/10.1007/s004420051009	WOS:000087457800010
363	J	Jönsson, AM; Linderson, ML; Stjernquist, I; Schlyter, P; Bärring, L	Climate change and the effect of temperature backlashes causing frost damage in <i>Picea abies</i>	GLOBAL AND PLANETARY CHANGE	Article	frost damage; global warming; Norway spruce; temperature backlash	In boreal and nemoboreal forests, tree frost hardiness is modified in reaction to cues from day length and temperature. The dehardening processes in Norway spruce, Picea abies, could be estimated to start when the daily mean temperature is above 5 degreesC for 5 days. Bud burst will occur approximately after 120-170 degree-days above 5 degreesC. dependent on genetic differences among provenances.…	2004	44	45748	http://dx.doi.org/10.1016/j.gloplacha.2004.06.012	WOS:000226062500013
364	J	Chertov, N; Nechaeva, Y; Zhulanov, A; Pystogova, N; Danilova, M; Boronnikova, S; Kalendar, R	Genetic Structure of <i>Pinus</i> Populations in the Urals	FORESTS	Article	inter-simple sequence repeats (ISSRs); genetic diversity; genetic structure; Pinus sylvestris L; Pinus sibirica Du Tour	The sustainable use and conservation of forest resources must be carried out with a detailed study of the main forest-forming plant species. Coniferous forests form the basis of boreal forest ecosystems and are of great economic importance. Representatives of forest-forming boreal coniferous species are species of the genus Pinus, including Siberian pine (Pinus sibirica Du Tour) and Scots pine (P…	2022	13	8	http://dx.doi.org/10.3390/f13081278	WOS:000845939800001
368	J	Skroppa, T; Steffenrem, A	Genetic variation in phenology and growth among and within Norway spruce populations from two altitudinal transects in Mid-Norway	SILVA FENNICA	Article	Picea abies; adaptation; clinal variation; populations; families; bud flush; height; tree breeding	Progenies from open pollinated cones collected in natural populations of Norway spruce (Picea abies (L.) Karst.) distributed along two altitudinal transects in Mid-Norway were tested in the nursery, in short term tests and in long-term field trials. The populations showed clinal variation related to the mean annual temperatures of the populations, with the earliest bud flush and cessation of shoo…	2019	53	1	http://dx.doi.org/10.14214/sf.10076	WOS:000462136100008
369	J	Salmela, MJ; Velmala, SM; Himanen, K; Ylioja, T; Pennanen, T	Soil factors and genetic variation regulate intraspecific growth in Norway spruce<i> (Picea abies)</i>	FOREST ECOLOGY AND MANAGEMENT	Article	Genotype x environment interaction; Intraspecific variation; Phenotypic plasticity; Plant economic spectrum; Roots; Trait dimension	Genotypic tradeoffs along environmental gradients help maintain diversity in functional traits in the wild and limit the range of suitable environments for each genotype in tree breeding programmes. Little is still known of the capacity of abiotic and biotic soil variation to generate marked shifts in genotypic performance ranks. We examined the potential of belowground soil factors to bring abou…	2024	558		http://dx.doi.org/10.1016/j.foreco.2024.121799	WOS:001203258200001
370	J	Levkoev, E; Mehtätalo, L; Luostarinen, K; Pulkkinen, P; Zhigunov, A; Peltola, H	Development of height growth and frost hardiness for one-year-old Norway spruce seedlings in greenhouse conditions in response to elevated temperature and atmospheric CO<sub>2</sub> concentration	SILVA FENNICA	Article	climate change; cold acclimation; tree growth; needles; seedlings; Picea abies	The mean temperature during the potential growing season (April-September) may increase by 1 degrees C by 2030, and by 4 degrees C, or even more, by 2100, accompanied by an increase in atmospheric CO2 concentrations of 536-807 ppm, compared to the current climate of 1981-2010, in which atmospheric CO2 is at about 350 ppm. This may affect both the growth and frost hardiness of boreal trees. In thi…	2018	52	3	http://dx.doi.org/10.14214/sf.9980	WOS:000468751200003
371	J	Rosner, S; Hannrup, B	Resin canal traits relevant for constitutive resistance of Norway spruce against bark beetles: environmental and genetic variability	FOREST ECOLOGY AND MANAGEMENT	Article	heritability; Ips typographus; Picea abies; plant-insect-interactions; resin canals	The influence of genetic determination and environment on the variability of secondary resin canal traits was investigated on 15-19-year-old Norway spruce (Picea abies (L.) Karst.) clones grown in Lower Austria (Pressbaum and Ulmerfeld) and southern Sweden (Knutstorp, and Hermanstorp). Eleven and 20 clones were present on the two Austrian and the two Swedish sites, respectively. The sites differe…	2004	200	45717	http://dx.doi.org/10.1016/j.foreco.2004.06.025	WOS:000224682400007
373	J	Colas, F; Perron, M; Tousignant, D; Parent, C; Pelletier, M; Lemay, P	A novel approach for the operational production of hybrid larch seeds under northern climatic conditions	FORESTRY CHRONICLE	Article	Japanese larch (Larix kaempferi [Lamb.] Carriere); European larch (Larix decidua Mill.); seed production; electrostatic pollination; indoor seed orchard	Hybrid larch ([Larix X marschlinsii Coaz], HL) is sought after by the forest industry because of its growth characteristics, excellent wood quality and disease resistance. However, the difficulty in obtaining HL seeds limits the production of seedlings for reforestation. Both European larch (Larix decidua Mill.) and Japanese larch (Larix kaempferi [Lamb.] Carriere) produce few seeds and the time …	2008	84	1	http://dx.doi.org/10.5558/tfc84095-1	WOS:000253248500031
374	J	Kersten, B; Rellstab, C; Schroeder, H; Brodbeck, S; Fladung, M; Krutovsky, KV; Gugerli, F	The mitochondrial genome sequence of <i>Abies alba</i> Mill. reveals a high structural and combinatorial variation	BMC GENOMICS	Article	Silver fir; Mitochondrial genome; Genome assembly; Long-read sequencing; Repetitive elements; mtDNA	Background Plant mitogenomes vary widely in size and genomic architecture. Although hundreds of plant mitogenomes of angiosperm species have already been sequence-characterized, only a few mitogenomes are available from gymnosperms. Silver fir (Abies alba) is an economically important gymnosperm species that is widely distributed in Europe and occupies a large range of environmental conditions. R…	2022	23	1	http://dx.doi.org/10.1186/s12864-022-08993-9	WOS:000889567500004
375	J	van Meeningen, Y; Wang, M; Karlsson, T; Seifert, A; Schurgers, G; Rinnan, R; Hoist, T	Isoprenoid emission variation of Norway spruce across a European latitudinal transect	ATMOSPHERIC ENVIRONMENT	Article	Biogenic volatile organic compounds; Picea abies; Latitudinal gradient; Genetic diversity; Emission profile	Norway spruce (Picea abies) is one of the dominant tree species in the European boreal zone with the capacity to grow over large areas within Europe. It is an important emitter of biogenic volatile organic compounds (BVOCs), which can act as precursors of photochemical smog and ozone and contribute to the formation and growth of secondary organic aerosols (SOA) in the atmosphere. Isoprenoid emiss…	2017	170		http://dx.doi.org/10.1016/j.atmosenv.2017.09.045	WOS:000415772800005
376	J	Li, X; Cai, KW; Zhao, QS; Li, HX; Wang, XL; Tigabu, M; Sederoff, R; Ma, WJ; Zhao, XY	Morphological and Comparative Transcriptome Analysis of Three Species of Five-Needle Pines: Insights Into Phenotypic Evolution and Phylogeny	FRONTIERS IN PLANT SCIENCE	Article	five-needle pines; Pinus koraiensis; Pinus sibirica; Pinus pumila; transcriptome sequencing; SSRs; Pinus phylogeny	Pinus koraiensis, Pinus sibirica, and Pinus pumila are the major five-needle pines in northeast China, with substantial economic and ecological values. The phenotypic variation, environmental adaptability and evolutionary relationships of these three five-needle pines remain largely undecided. It is therefore important to study their genetic differentiation and evolutionary history. To obtain mor…	2022	13		http://dx.doi.org/10.3389/fpls.2022.795631	WOS:000760785700001
377	J	Matisons, R; Zeltin, P; Ka, R; Ozolin, K	Productivity of local Norway spruce clones relates to weather sensitivity of height increment in the eastern Baltic region	DENDROCHRONOLOGIA	Article	Primary growth; Picea abies; Productivity -sensitivity relationships; Climatic gradient; Nonlinear response	In the eastern Baltic region, Norway spruce (Picea abies) is predicted to decrease in abundance, resulting in substantial economic consequences. Such predictions have been based on distribution, as well as the sensitivity of growth, largely neglecting the adaptive potential of local populations. Under such circumstances, information on growth sensitivity and its genetic control, as well as produc…	2024	85		http://dx.doi.org/10.1016/j.dendro.2024.126187	WOS:001208458400001
378	J	Liziniewicz, M; Berlin, M	Differences in growth and areal production between Norway spruce (<i>Picea abies</i> L. Karst) regeneration material representing different levels of genetic improvement	FOREST ECOLOGY AND MANAGEMENT	Article		Six groups of Norway spruce (Picea abies L. Karst) plants with varying levels of genetic gain and unimproved local provenances were compared in four realised gain trials at four sites in central Sweden. The groups were planted separately in experimental plots and compared in terms of survival rate and height 4 years after planting, as well as survival rate, height, diameter and areal volume produ…	2019	435		http://dx.doi.org/10.1016/j.foreco.2018.12.044	WOS:000457950000019
379	J	Pretzsch, H; del Río, M; Arcangeli, C; Bielak, K; Dudzinska, M; Forrester, DI; Kohnle, U; Ledermann, T; Matthews, R; Nagel, R; Ningre, F; Nord-Larsen, T; Szeligowski, H; Biber, P	Competition-based mortality and tree losses. An essential component of net primary productivity	FOREST ECOLOGY AND MANAGEMENT	Article	Competition-based mortality; Self-thinning; Natural stem volume turnover; Carbon storage; Standing stock vs; total stand production; Long -term observation	Even-aged stands can regenerate with many thousand seedlings per hectare before the density declines to just a few hundred trees per hectare 100 years later; management practices can lead to even lower tree numbers due to quality selection and thinning. In other words, during the development of unmanaged stands, the majority of individuals die naturally due to competition. Despite the far-reachin…	2023	544		http://dx.doi.org/10.1016/j.foreco.2023.121204	WOS:001039340500001
380	J	Marchi, M	Combining genetic and environmental data to map and model regions of provenance for silver fir (Abies alba Mill.) in Italy	NEW FORESTS	Article	Unique lineages; CMIP6; Climate; Genecology; Forest genetics	Regions of provenance for forest reproductive materials are the basis for wise use of forest resources in a changing climate. In this work a modelling framework is proposed for silver fir (Abies alba Mill.) in Italy where genetic clusters described by nuclear microsatellites were combined with high-resolution climatic data. When the genetic clusters were too large or had an uncertain ecological n…	2024	55	4	http://dx.doi.org/10.1007/s11056-023-10000-2	WOS:001078492600001
382	J	Yousefpour, R; Hanewinkel, M	Balancing Decisions for Adaptive and Multipurpose Conversion of Norway Spruce (<i>Picea abies</i> L. Karst) Monocultures in the Black Forest Area of Germany	FOREST SCIENCE	Article	TreeGrOSS; probability distribution; stochastic genetic algorithm; balanced decisions; adaptive forest conversion	This study presents a combined simulation-optimization approach for the multipurpose conversion of Norway spruce (Picea abies L. Karst) forests in the Black Forest area of Germany. Conversion strategies were modeled as a means of adapting existing spruce forests to an expected climate change by admixing beech (Fagus sylvatica L.), a native species in large areas of the low mountain ranges of Cent…	2014	60	1	http://dx.doi.org/10.5849/forsci.11-125	WOS:000330605500009
383	J	Zhirnova, DF; Babushkina, EA; Belokopytova, LV; Vaganov, EA	To which side are the scales swinging? Growth stability of Siberian larch under permanent moisture deficit with periodic droughts	FOREST ECOLOGY AND MANAGEMENT	Article	Radial growth; Larix sibirica; Kuznetsk Alatau; Forest-steppe; Climate-growth relationships; Pointer years; Drought stress	In moisture-limited regions in which droughts leave a significant "footprint", monitoring of quantitative climatic parameters and of forest adaptation and acclimation to these parameters is of utmost importance due to the ambiguity of spatial patterns in reaction of tree growth to drought and the variety of drought resistance strategies exhibited by trees at the genetic, morphological and physiol…	2020	459		http://dx.doi.org/10.1016/j.foreco.2019.117841	WOS:000512482900009
384	J	Hrivnák, M; Krajmerová, D; Gömöry, D	LACK OF SIGNALS OF SELECTION AT CANDIDATE LOCI AT A SMALL GEOGRAPHICAL SCALE ALONG A STEEP ALTITUDINAL GRADIENT IN NORWAY SPRUCE (<i>PICEA ABIES</i> [L. KARST.)	ACTA BIOLOGICA CRACOVIENSIA SERIES BOTANICA	Article	local adaptation; single nucleotide polymorphisms; F-ST outliers; spatial analysis method	Local adaptation is a key concept in biology: shift of genetic structures of populations due to differential survival of genotypes is expected to lead to phenotypes providing an advantage in the local environment. Variation of sequences of twelve candidate genes was investigated in 13 Norway spruce (Picea abies (L.) Karst.) provenances originating from sites distributed along an altitudinal gradi…	2019	61	1	http://dx.doi.org/10.24425/abcsb.2019.127740	WOS:000473522300007
385	J	Velmala, SM; Rajala, T; Haapanen, M; Taylor, AFS; Pennanen, T	Genetic host-tree effects on the ectomycorrhizal community and root characteristics of Norway spruce	MYCORRHIZA	Article	ECM fungi; Picea abies; Broad sense heritability; Clonal cuttings; Fine roots; Thelephora terrestris	A greenhouse experiment was used to study the effects of host genotype on short root formation and ectomycorrhizal (ECM) fungal community structure in Norway spruce (Picea abies (L.) Karst.). Rooted cuttings representing 55 clones were inoculated with a mix of vegetative hyphae of five ECM fungal species (Laccaria sp., Amphinema byssoides, Piloderma sp., Cadophora finlandia, Paxillus involutus). …	2013	23	1	http://dx.doi.org/10.1007/s00572-012-0446-y	WOS:000313078100003
386	J	Simunek, V; Stejskal, J; Cepl, J; Korecky, J; Vacek, Z; Vacek, S; Bílek, L; Svanda, M	Different Adaptive Potential of Norway Spruce Ecotypes in Response to Climate Change in Czech Long-Term Lowland Experiment	FORESTS	Article	Picea abies [L.] Karst; drought; tree-ring growth; genetic variability; carbon sequestration	As a result of climate change, Norway spruce (Picea abies [L.] Karst.) is dying across Europe. One of the primary reasons for this is the cultivation of unsuitable spruce provenances and ecotypes. This study deals with the growth and genetics of the ecotypes of Norway spruce, the most important tree species of the Czech Republic. At the study site, namely Cukrak, an experimental site was establis…	2023	14	9	http://dx.doi.org/10.3390/f14091922	WOS:001080879600001
387	J	Hayatgheibi, H; Forsberg, NEG; Lundqvist, SO; Mörling, T; Mellerowicz, EJ; Karlsson, B; Wu, HX; García-Gil, MR	Genetic control of transition from juvenile to mature wood with respect to microfibril angle in Norway spruce (<i>Picea abies</i>) and lodgepole pine (<i>Pinus contorta</i>)	CANADIAN JOURNAL OF FOREST RESEARCH	Article	lodgepole pine; Norway spruce; transition wood; microfibril angle; genetic variation; early selection	Genetic control of microfibril angle (MFA) transition from juvenile wood to mature wood was evaluated in Norway spruce (Picea abies (L.) Karst) and lodgepole pine (Pinus contorta Douglas ex Loudon). Increment cores were collected at breast height (1.3 m) from 5664 trees in two 21-year-old Norway spruce progeny trials in southern Sweden and from 823 trees in two lodgepole pine progeny trials, aged…	2018	48	11	http://dx.doi.org/10.1139/cjfr-2018-0140	WOS:000448999100012
388	J	Salzer, K; Gugerli, F	Reduced fitness at early life stages in peripheral versus core populations of Swiss stone pine (<i>Pinus cembra</i>) is not reflected by levels of inbreeding in seed families	ALPINE BOTANY	Article	Common garden experiment; Core/periphery; Germination; Offspring fitness; Selfing rate; Small population size	Small and fragmented populations are prone to mating among related individuals, increasing homozygosity and likely negatively affecting offspring fitness. Such a trend may be enforced by environmental changes in species with narrow ecological niches because inbred populations are more prone to become maladapted as compared to outcrossed populations. Here, we studied differences in offspring fitne…	2012	122	2	http://dx.doi.org/10.1007/s00035-012-0106-z	WOS:000310885100002
389	J	Popovic, V; Jovanovic, DS; Lucic, A; Rakonjac, L; Jovanovic, S; Vasiljevic, A; Miljkovic, D	SPATIAL VARIATION OF MORPHOLOGICAL NEEDLE TRAITS OF SILVER FIR (<i>ABIES ALBA</i> MILL.) POPULATIONS IN THE BALKAN PENINSULA IN RELATION TO CLIMATIC FACTORS	SUMARSKI LIST	Article	needle morphology; climatic factors; silver fir; Balkan Peninsula	Interpopulation and intrapopulation variability of three morphological needle traits (length, width and thickness) was investigated in 16 natural silver fir populations in the Balkan Peninsula. The populations represent refugial areas of silver fir (Abies alba Mill.). This paper aims to provide a comprehensive analysis of the influence of climatic factors (mean annual temperature, number of days …	2022	146	45876	http://dx.doi.org/10.31298/SL.146.7-8.3	WOS:000854907300004
391	J	Park, YD; Lee, DK; Batkhuu, NO; Tsogtbaatar, J; Combalicer, MS; Park, GE; Woo, SY	Woody Species Variations in Biomass Allocation, Photosynthetic WUE and Carbon Isotope Composition under Natural Drought Condition in Mongolia	JOURNAL OF ENVIRONMENTAL SCIENCE AND MANAGEMENT	Article	Caragana arborescens; carbon isotope composition; drought tolerance; field nursery; Hippophae rhamnoides; Larix sibirica; photosynthesis; Pinus sylvestris; root weight ratio; Ulmus pumila; water deficit	Water is one of the most limiting environmental factors for successful rehabilitation in Mongolia. In this study, variations in biomass allocation, water use efficiency (WUE) and carbon isotope composition of five woody species (Caragana arborescens Lam., Hippophae rhamnoides L., Larix sibirica Ledeb., Pinus sylvestris L. and Ulmus pumila L.) seedlings were investigated in an open field nursery. …	2012				WOS:000305846200003
392	J	Kobal, M; Grcman, H; Zupan, M; Levanic, T; Simoncic, P; Kadunc, A; Hladnik, D	Influence of soil properties on silver fir (<i>Abies alba</i> Mill.) growth in the Dinaric Mountains	FOREST ECOLOGY AND MANAGEMENT	Article	Basal area increment; Height growth; Soil development; Karst; Diverse topography; Available water content	Tree growth can be influenced by a wide variety of complex interacting factors. The contribution of soil to site productivity is confounded by the interactions between other site factors and silviculture. The contribution of soil properties to the growth of silver fir (Abies alba Mill.) was studied in the Dinaric Mountains, which are characterised by abundant sinkholes and limestone outcrops, res…	2015	337		http://dx.doi.org/10.1016/j.foreco.2014.10.017	WOS:000348084200009
393	J	Chen, ZQ; Abramowicz, K; Raczkowski, R; Ganea, S; Wu, HX; Lundqvist, SO; Mörling, T; de Luna, SS; Gil, MRG; Mellerowicz, EJ	Method for accurate fiber length determination from increment cores for large-scale population analyses in Norway spruce	HOLZFORSCHUNG	Article	expectation-maximization; fiber length; increment core; optical fiber analyzer; Picea abies; tracheid length	Fiber (tracheid) length is an important trait targeted for genetic and silvicultural improvement. Such studies require large-scale non-destructive sampling, and accurate length determination. The standard procedure for non-destructive sampling is to collect increment cores, singularize their cells by maceration, measure them with optical analyzer and apply various corrections to suppress influenc…	2016	70	9	http://dx.doi.org/10.1515/hf-2015-0138	WOS:000385808000004
395	J	Gräns, D; Hannrup, B; Isik, F; Lundqvist, SO; McKeand, S	Genetic variation and relationships to growth traits for microfibril angle, wood density and modulus of elasticity in a Picea abies clonal trial in southern Sweden	SCANDINAVIAN JOURNAL OF FOREST RESEARCH	Article	Juvenile wood; solid wood products; X-ray diffraction	Genetic variation in wood density, microfibril angle (MFA), wood stiffness (MOE), height, diameter and volume was investigated in a 26-year-old Norway spruce [(Picea abies (L.) Karst.] clonal trial in southern Sweden. Wood quality measurements were performed on 10 mm increment cores using SilviScan. For MFA, mean values of annual rings showed the highest value (30 degrees) at ring 2 counting from…	2009	24	6	http://dx.doi.org/10.1080/02827580903280061	WOS:000272479700005
396	J	Paluch, J; Zarek, M; Kempf, M	The effect of population density on gene flow between adult trees and the seedling bank in Abies alba Mill.	EUROPEAN JOURNAL OF FOREST RESEARCH	Article	Natural regeneration; Mixed forest; Spatial genetic structure; Genetic distance; Genetic isolation; Seed trees	Populations of smaller effective sizes or subjected to strong environmental filtering have a higher risk of stochastic changes in their genetic properties. This study tested the hypothesis that reducing the density of parent trees combined with environmental filtering during the stage of regeneration establishment affects gene flow between the parent and offspring populations of Abies alba Mill. …	2019	138	2	http://dx.doi.org/10.1007/s10342-019-01162-w	WOS:000461561000002
397	J	Csilléry, K; Buchmann, N; Brendel, O; Gessler, A; Glauser, A; Kupferschmid, AD	Recovery of silver fir (<i>Abies alba</i> Mill.) seedlings from ungulate browsing mirrors soil nitrogen availability	TREE PHYSIOLOGY	Article	herbivory; mountain forests; mycorrhiza; nitrogen; non-structural carbohydrates; simulated browsing; stable isotopes; water-use efficiency	Abies alba (Mill.) has a high potential for mitigating climate change in European mountain forests; yet, its natural regeneration is severely limited by ungulate browsing. Here, we simulated browsing in a common garden experiment to study growth and physiological traits, measured from bulk needles, using a randomized block design with two levels of browsing severity and seedlings originating from…	2022	42	2	http://dx.doi.org/10.1093/treephys/tpab105	WOS:000810029400006
398	C	Hertel, H; Paul, M	Field testing of model populations of Norway spruce (<i>Picea abies</i> L. KARST.) with different genetic structures for reforestation in air polluted regions	GENETIC RESPONSE OF FOREST SYSTEMS TO CHANGING ENVIRONMENTAL CONDITIONS	Proceedings Paper	Picea abies; population genetics; gene conservation; breeding strategies; reforestation; crossing; progeny test; isozyme gene markers; heterozygosity	The presented paper refers to special importance of long-term programs in the field of gene conservation and forest tree breeding for the Saxon Ore Mountains as well as accompanying genetic investigation. The situation required taking the necessary steps, because many Norway spruce stands have died back in part or completely in the Ore Mountains in the eastern part of Germany due to several decad…	2001	70			WOS:000175261600028
399	J	Scotti-Saintagne, C; Boivin, T; Suez, M; Musch, B; Scotti, I; Fady, B	Signature of mid-Pleistocene lineages in the European silver fir (<i>Abies alba</i> Mill.) at its geographic distribution margin	ECOLOGY AND EVOLUTION	Article	admixture; conservation; demography; French Pyrenees; genetic diversity; keystone species; Phylogeography; Quaternary climate; range-edge	In a conservation and sustainable management perspective, we identify the ecological, climatic, and demographic factors responsible for the genetic diversity patterns of the European silver fir (Abies alba Mill.) at its southwestern range margin (Pyrenees Mountains, France, Europe). We sampled 45 populations throughout the French Pyrenees and eight neighboring reference populations in the Massif …	2021	11	16	http://dx.doi.org/10.1002/ece3.7886	WOS:000675059400001
400	J	Chen, ZQ; Karlsson, B; Mörling, T; Olsson, L; Mellerowicz, EJ; Wu, HX; Lundqvist, SO; Gil, MRG	Genetic analysis of fiber dimensions and their correlation with stem diameter and solid-wood properties in Norway spruce	TREE GENETICS & GENOMES	Article	Fiber dimensions; Age-age correlations; Heritability; Genetic correlations; Early selection; Picea abies; Norway spruce	Adverse genetic correlations between growth traits and solid-wood, as well as fiber traits are a concern in conifer breeding programs. To evaluate the impact of selection for growth and solid-wood properties on fiber dimensions, we investigated the inheritance and efficiency of early selection for different wood-fiber traits and their correlations with stem diameter, wood density, modulus of elas…	2016	12	6	http://dx.doi.org/10.1007/s11295-016-1065-0	WOS:000397238800023
401	J	Avanzi, C; Piermattei, A; Piotti, A; Büntgen, U; Heer, K; Opgenoorth, L; Spanu, I; Urbinati, C; Vendramin, GG; Leonardi, S	Disentangling the effects of spatial proximity and genetic similarity on individual growth performances in Norway spruce natural populations	SCIENCE OF THE TOTAL ENVIRONMENT	Article	Picea abies; Growth-climate correlation; Genetic relatedness; Mixed-effects model; Individual-based dendroecology; Dendrophenotypes	Cambial growth is a phenotypic trait influenced by various physiological processes, numerous biotic and abiotic drivers, as well as by the genetic background. By archiving the outcome of such complex interplay, tree-rings are an exceptional resource for addressing individual long-term growth responses to changing environments and climate. Disentangling the effects of the different drivers of tree…	2019	650		http://dx.doi.org/10.1016/j.scitotenv.2018.08.348	WOS:000447092700051
402	J	Cremer, E; Ziegenhagen, B; Schulerowitz, K; Mengel, C; Donges, K; Bialozyt, R; Hussendörfer, E; Liepelt, S	Local seed dispersal in European silver fir (Abies alba Mill.): lessons learned from a seed trap experiment	TREES-STRUCTURE AND FUNCTION	Article	Seed dispersal; Recolonization; Forest blowdown; Nuclear microsatellite markers	Seed dispersal is an important factor influencing the genetic structure of forest tree populations. Knowledge about the seed shadow is important to assess the ability of tree species to colonize new and disturbed habitats or to respond to environmental change by migrating to more suitable habitats. In a seed trap experiment, we investigated local seed dispersal distances of silver fir seeds (Abie…	2012	26	3	http://dx.doi.org/10.1007/s00468-012-0676-9	WOS:000303470000027
405	J	Mejnartowicz, L	Genetic analysis of silver-fir populations in the north Carpathian and Sudeten mountains	ACTA SOCIETATIS BOTANICORUM POLONIAE	Article	Abies alba; silver-fir isozymes; heterozygosity; genetic diversity; genetic distance; Carpathian Mts.; Sudeten Mts	Seeds collected from individual trees in the 16 Carpathian and 2 Sudeten silver-fir (Abies alba) populations were studied with the starch gel electrophoresis in megagametophytes using 14 enzyme systems with 28 loci. The results show that the geographical distance between populations are in a small part reflected in genetic distances. There are two main groups of populations: Sudeten and Carpathia…	2004	73	4		WOS:000225318700003
406	J	Höhn, M; Avanzi, C; Fady, B; Heer, K; Opgenoorth, L; Piotti, A; Popescu, F; Postolache, D; Vendramin, GG; Csilléry, K	Fine-scale spatial genetic structure across the species range reflects recent colonization of high elevation habitats in silver fir (<i>Abies alba</i> Mill.)	MOLECULAR ECOLOGY	Article	climate change; colonization; demography; distribution range; fine-scale spatial genetic structure; forest tree; genetic diversity; reproductive success; sampling	Variation in genetic diversity across species ranges has long been recognized as highly informative for assessing populations' resilience and adaptive potential. The spatial distribution of genetic diversity within populations, referred to as fine-scale spatial genetic structure (FSGS), also carries information about recent demographic changes, yet it has rarely been connected to range scale proc…	2021	30	20	http://dx.doi.org/10.1111/mec.16107	WOS:000686483600001
409	J	Novikova, SV; Oreshkova, NV; Sharov, VV; Kuzmin, DA; Demidko, DA; Bisirova, EM; Zhirnova, DF; Belokopytova, LV; Babushkina, EA; Krutovsky, KV	Study of the Genetic Mechanisms of Siberian Stone Pine (<i>Pinus sibirica</i> Du Tour) Adaptation to the Climatic and Pest Outbreak Stresses Using Dendrogenomic Approach	INTERNATIONAL JOURNAL OF MOLECULAR SCIENCES	Article	ddRADseq; dendrophenotype; drought; environmental stress; genome; genotyping by sequencing; GWAS; <italic>Neodiprion sertifer</italic> Geoff.; pine sawfly; SNPs	A joint analysis of dendrochronological and genomic data was performed to identify genetic mechanisms of adaptation and assess the adaptive genetic potential of Siberian stone pine (Pinus sibirica Du Tour) populations. The data obtained are necessary for predicting the effect of climate change and mitigating its negative consequences. Presented are the results of an association analysis of the va…	2024	25	21	http://dx.doi.org/10.3390/ijms252111767	WOS:001351323000001
410	J	Nemesio-Gorriz, M; Hammerbacher, A; Ihrmark, K; Källman, T; Olson, Å; Lascoux, M; Stenlid, J; Gershenzon, J; Elfstrand, M	Different Alleles of a Gene Encoding Leucoanthocyanidin Reductase (<i>PaLAR3</i>) Influence Resistance against the Fungus <i>Heterobasidion parviporum</i> in <i>Picea</i> <i>abies</i>	PLANT PHYSIOLOGY	Article		Despite the fact that fungal diseases are a growing menace for conifers in modern silviculture, only a very limited number of molecular markers for pathogen resistance have been validated in conifer species. A previous genetic study indicated that the resistance of Norway spruce (Picea abies) to Heterobasidion annosum s.l., a pathogenic basidiomycete species complex, is linked to a quantitative t…	2016	171	4	http://dx.doi.org/10.1104/pp.16.00685	WOS:000381303700031
411	J	Egbäck, S; Nilsson, U; Nyström, K; Högberg, KA; Fahlvik, N	Modeling early height growth in trials of genetically improved Norway spruce and Scots pine in southern Sweden	SILVA FENNICA	Article	individual tree growth model; genetic component; genetic multiplier; unimproved material; improved material; Picea abies; Pinus sylvestris	Genetically improved Norway spruce (Picea abies (L.) Karst.) and Scots pine (Pinus sylvestris L.) are used extensively in operational Swedish forestry plantations to increase production. Depending on the genetic status of the plant material, the current estimated genetic gain in growth is in the range 10-20% for these species and this is expected to increase further in the near future. However, g…	2017	51	3	http://dx.doi.org/10.14214/sf.5662	WOS:000405579900003
412	J	Hansen, OK	Mating patterns, genetic composition and diversity levels in two seed orchards with few clones - Impact on planting crop	FOREST ECOLOGY AND MANAGEMENT	Article	clonal seed orchards; Abies alba; Larix kaempferi; paternity analysis; siring success; genetic diversity	Paternity analyses using microsatellites were conducted in two conifer clonal seed orchards (CSOs). The aim was to study mating patterns and potential dysfunctions such as unbalanced male contribution, and how these factors influence genetic diversity. The effect of unequal male contribution was quantified by the status number (N-s), which reflects build up of coancestry in the seed orchard crop …	2008	256	5	http://dx.doi.org/10.1016/j.foreco.2008.06.032	WOS:000259388400034
413	J	Vasileva, Y; Zhulanov, A; Chertov, N; Sboeva, Y; Boronnikova, S; Pechenkina, V; Nechaeva, Y; Kalendar, R	Identification of SNPs Associated with Drought Resistance in Hybrid Populations of <i>Picea abies</i> (L.) H. Karst.-<i>P. obovata</i> (Ledeb.)	GENES	Article	adaptive-significant genes; SNP; nucleotide diversity; drought resistance; <italic>P. abies</italic>-<italic>P. obovata</italic> spruce complex; the Urals	Background/Objectives: The spruces of the Picea abies-P. obovata complex have a total range that is the most extensive in the world flora of woody conifers. Hybridization between the nominative species has led to the formation of a wide introgression zone, which probably increases the adaptive potential of the entire species complex. This study aimed to search the genes associated with drought re…	2024	15	11	http://dx.doi.org/10.3390/genes15111440	WOS:001365074700001
414	J	Kroon, J; Ericsson, T; Jansson, G; Andersson, B	Patterns of genetic parameters for height in field genetic tests of <i>Picea abies</i> and <i>Pinus sylvestris</i> in Sweden	TREE GENETICS & GENOMES	Article	Genetic trends; Genetic gain; Tree height; Genetic expression; Breeding; Tree improvement; Genotype evaluation; Meta-analysis; Picea abies (L.) Karst; Pinus sylvestris L.	We reviewed the genetic parameter estimates carried out from 1992 to 2006 for height increment in genetic tests of Norway spruce and Scots pine, to describe patterns of genetic variation, heritability, and genetic correlations. The material included seedling and clonal tests in Sweden, aged between 5 and 20 years. Multiple regression was used to explore relationships between parameter values and …	2011	7	6	http://dx.doi.org/10.1007/s11295-011-0398-y	WOS:000299507700001
415	C	Riegel, R; Schubert, R; Muller-Starck, G; Karnosky, DF; Paule, L	Genetic variation in two heavily polluted stands of Norway spruce (<i>Picea abies</i> [L.] Karst.) as indicated by nuclear and organelle DNA markers	GENETIC RESPONSE OF FOREST SYSTEMS TO CHANGING ENVIRONMENTAL CONDITIONS	Proceedings Paper	EST marker; cpDNA; microsatellites; isoenzyme gene marker; genetic variation; diversity; heterozygosity; air pollution; heavy metals; tolerance; Picea abies	In two polluted neighbouring stands of Norway spruce, "tolerant" and "sensitive" adult trees were selected in pairs and genotyped by recently developed codominant EST markers as well as by chloroplast microsatellites. The results were compared with data previously obtained from isoenzyme gene markers. Larger allelic multiplicities are indicated in the two sensitive subsets as compared to the tole…	2001	70			WOS:000175261600003
416	J	Karlsson, B; Wellendorf, H; Roulund, H; Werner, M	Genotype x trial interaction and stability across sites in 11 combined provenance and clone experiments with <i>Picea abies</i> in Denmark and Sweden	CANADIAN JOURNAL OF FOREST RESEARCH-REVUE CANADIENNE DE RECHERCHE FORESTIERE	Article		In 1997, eleven combined Picea abies (L.) Karst. provenance and clone trials were assessed in two series, with identical genetic constitution and design, in locations ranging from western Denmark to central Sweden, after 14 and 11 years, respectively. The phenotypic variation was larger for mixtures of 24 clones than for seedlings in one series, although 10 times more genotypes were represented a…	2001	31	10	http://dx.doi.org/10.1139/cjfr-31-10-1826	WOS:000171520200017
418	J	Csilléry, K; Ovaskainen, O; Sperisen, C; Buchmann, N; Widmer, A; Gugerli, F	Adaptation to local climate in multi-trait space: evidence from silver fir (<i>Abies</i> <i>alba</i> Mill.) populations across a heterogeneous environment	HEREDITY	Article		Heterogeneous environments, such as mountainous landscapes, create spatially varying selection pressure that potentially affects several traits simultaneously across different life stages, yet little is known about the general patterns and drivers of adaptation in such complex settings. We studied silver fir (Abies alba Mill.) populations across Switzerland and characterized its mountainous lands…	2020	124	1	http://dx.doi.org/10.1038/s41437-019-0240-0	WOS:000502333100007
419	J	Mellert, KH; Schmied, G; Buness, V; Steckel, M; Uhl, E; Seho, M; Pretzsch, H	Small-scale variation in available water capacity of the soil influences height growth of single trees in Southern Germany	FOREST SYSTEMS	Article	climatic niche; environmental niche; forest genetic studies; microsite; plus tree selection; soil water regime; tree breeding	Aim of study: Detecting possible small-scale soil effects on height growth of single trees in monospecific stands of three important tree species (Abies alba, Fagus sylvatica, and Picea abies). Area of study: 37 mature stands along an ecological gradient in Southern Germany from the cold and wet "optimal niche zone" to warmer and drier niche zones, including gravelly soils with poor water supply.…	2023	32	2	http://dx.doi.org/10.5424/fs/2023322-20197	WOS:001038778500004
420	J	Suvanto, S; Nöjd, P; Henttonen, HM; Beuker, E; Mäkinen, H	Geographical patterns in the radial growth response of Norway spruce provenances to climatic variation	AGRICULTURAL AND FOREST METEOROLOGY	Article	Picea abies; Provenance experiment; Tree-ring width; Cambial growth; Increment variation; Growth variation	Changing climate is expected to cause range shifts and reduced growth in Norway spruce (Picea abies (L.) Karst). In order to mitigate these changes, genetic variation between populations can be utilized in selecting alternative tree origins that are better suited to the new conditions. The aim of this study was to examine the intraspecific differences in the climatic drivers of radial growth in N…	2016	222		http://dx.doi.org/10.1016/j.agrformet.2016.03.003	WOS:000375161400002
422	J	Paluch, J; Zarek, M	Seed dispersal of anemochoric <i>Abies alba</i> Mill.: lessons from seed tracking, seed trap experiments and the genetic parentage assignment of seedlings	ANNALS OF FOREST RESEARCH	Article	wind dispersal; seed shadow; seed-tracking; gene shadow; natural regeneration; inverse modelling	Seed dispersal, an important process is estimated by different methods. In this study we compared seed shadows of the anemochoric species Abies alba Mill. obtained from (1) models derived from seed trapping data and inverse modelling, (2) ballistic models, based on wind speed at canopy height and an exponential wind profile and (3) empirical models parameterised from seed-tracking data. In additi…	2020	63	1	http://dx.doi.org/10.15287/afr.2019.1705	WOS:000588733900002
423	J	Schmid, S; Genevest, R; Gobet, E; Suchan, T; Sperisen, C; Tinner, W; Alvarez, N	HyRAD-X, a versatile method combining exome capture and RAD sequencing to extract genomic information from ancient DNA	METHODS IN ECOLOGY AND EVOLUTION	Article	Abies alba; ancient DNA; anthropogenic perturbations; exome reduction; genetic diversity; hybridization capture; population genomics; RAD sequencing; subfossils; time series	Over the last decade, protocols aimed at reproducibly sequencing reduced-genome subsets in non-model organisms have been widely developed. Their use is, however, limited to DNA of relatively high molecular weight. During the last year, several methods exploiting hybridization capture using probes based on RAD-sequencing loci have circumvented this limitation and opened avenues to the study of sam…	2017	8	10	http://dx.doi.org/10.1111/2041-210X.12785	WOS:000412858600022
424	J	Lendvay, B; Bálint, M; Pál, I; Vincze, I; Orbán, I; Magyari, EK	Plant macrofossils from lake sediment as the material to assess ancient genetic diversity: Did deforestation influence Norway spruce (<i>Picea abies</i>) in the South Carpathians?	QUATERNARY INTERNATIONAL	Article	Ancient DNA; Holocene; Intra-specific genetic variation; Lake sediment; Macrofossil; Plastid DNA	How genetic diversity of populations reacts to neutral or adaptive processes such as population bottlenecks, immigration or local adaptation are central questions of population genetics. They may be directly answered through ancient DNA analysis, however such studies in plants are remarkably scarce, owing to the difficulty of gaining population-scale samples with good DNA preservation. Plant macr…	2018	477		http://dx.doi.org/10.1016/j.quaint.2018.02.023	WOS:000432449400008
425	J	Ballian, D	GENETIC STRUCTURE OF SILVER FIR (<i>Abies Alba</i> Mill.) FROM WESTERN AND EASTERN BOSNIA	SUMARSKI LIST	Article		Molecular and genetic analysis of Silver Fir (Abies alba Mill) was carried out by acknowledged and verified biochemical markers. Analysed material is from 10 natural populations out of which five populations is from eastern and five from western Bosnia. Conducted genetic analysis using 9 enzyme systems and 17 alozyme gene loci with 44 alleles showed differences between western and eastern Populat…	2009	133	45939		WOS:000272225100004
426	J	Nybakken, L; Floistad, IS; Mageroy, M; Lomsdal, M; Strålberg, S; Krokene, P; Asplund, J	Constitutive and inducible chemical defences in nursery-grown and naturally regenerated Norway spruce (<i>Picea abies</i>) plants	FOREST ECOLOGY AND MANAGEMENT	Article	Hylobius abietis; Terpenes; Phenolics; Methyl jasmonate; Reforestation; Plant defence	Nursery-grown Norway spruce Picea abies seedlings are often heavily attacked by the pine weevil Hylobius abietis on clear-cuts the first years after planting. Because the seedlings are not resource-limited during the growing phase in the nursery they are expected to invest less in defence than naturally regenerated seedlings already present on the clear-cuts. The latter have had to cope with vari…	2021	491		http://dx.doi.org/10.1016/j.foreco.2021.119180	WOS:000647738700004
427	J	Roschanski, AM; Csilléry, K; Liepelt, S; Oddou-Muratorio, S; Ziegenhagen, B; Huard, F; Ullrich, KK; Postolache, D; Vendramin, GG; Fady, B	Evidence of divergent selection for drought and cold tolerance at landscape and local scales in <i>Abies alba</i> Mill. in the French Mediterranean Alps	MOLECULAR ECOLOGY	Article	candidate gene; European silver fir; isolation by environment; landscape genomics; microclimate; selection	Understanding local adaptation in forest trees is currently a key research and societal priority. Geographically and ecologically marginal populations provide ideal case studies, because environmental stress along with reduced gene flow can facilitate the establishment of locally adapted populations. We sampled European silver fir (Abies alba Mill.) trees in the French Mediterranean Alps, along t…	2016	25	3	http://dx.doi.org/10.1111/mec.13516	WOS:000369869600008
428	J	Salmela, MJ	Patterns of genetic diversity vary among shoot and root functional traits in Norway spruce <i>Picea abies</i> along a latitudinal gradient	OIKOS	Article	adaptation; environmental heterogeneity; phenotypic plasticity; plant economic spectrum; roots; trait-based ecology	Roots constitute a major segment of plant biomass, and variation in belowground traits in situ correlates with environmental gradients at large spatial scales. Local adaptation of populations maintains intraspecific genetic variation in various shoot traits, but the contribution of genetic factors to adaptation to soil heterogeneity remains poorly known. I established a common-garden experiment w…	2021	130	7	http://dx.doi.org/10.1111/oik.08203	WOS:000647823000001
429	J	Lind, M; Källman, T; Chen, J; Ma, XF; Bousquet, J; Morgante, M; Zaina, G; Karlsson, B; Elfstrand, M; Lascoux, M; Stenlid, J	A <i>Picea abies</i> Linkage Map Based on SNP Markers Identifies QTLs for Four Aspects of Resistance to <i>Heterobasidion parviporum</i> Infection	PLOS ONE	Article		A consensus linkage map of Picea abies, an economically important conifer, was constructed based on the segregation of 686 SNP markers in a F-1 progeny population consisting of 247 individuals. The total length of 1889.2 cM covered 96.5% of the estimated genome length and comprised 12 large linkage groups, corresponding to the number of haploid P. abies chromosomes. The sizes of the groups (from …	2014	9	7	http://dx.doi.org/10.1371/journal.pone.0101049	WOS:000339615200012
430	J	Zubizarreta-Gerendiain, A; Gort-Oromi, J; Mehtätalo, L; Peltola, H; Venäläinen, A; Pulkkinen, P	Effects of cambial age, clone and climatic factors on ring width and ring density in Norway spruce (<i>Picea abies</i>) in southeastern Finland	FOREST ECOLOGY AND MANAGEMENT	Article	Climatic variability; Genetic origin; Mixed modelling; Radial growth; Ring density	The aim of this study was to analyse the effects of cambial age, clone and climatic factors (i.e. monthly mean temperature and monthly total precipitation) on ring width (RW) and ring density (RD) development from pith to bark in 30-years-old Norway spruce (Picea abies) grown on a fertile agricultural soil in southeastern Finland. The material consisted of 20 Finnish clones, which represented sou…	2012	263		http://dx.doi.org/10.1016/j.foreco.2011.09.011	WOS:000298532200002
432	C	Sadovsky, M; Putintseva, Y; Birukov, V; Novikova, S; Krutovsky, K	<i>De Novo</i> Assembly and Cluster Analysis of Siberian Larch Transcriptome and Genome	BIOINFORMATICS AND BIOMEDICAL ENGINEERING (IWBBIO 2016)	Proceedings Paper	Frequency; Triplet; Order; Cluster; Elastic map; Evolution	We studied Siberian Larch (Larix Sibirica) transcriptome making de novo assembly and cluster analysis of contigs frequency dictionaries. Also, some preliminary results of similar study of the larch genome are present. It was found that the larch transcriptome yields a number of unexpected symmetries in the statistical and combinatorial properties of the entities.	2016	9656		http://dx.doi.org/10.1007/978-3-319-31744-1_41	WOS:000401938000041
433	J	Pretzsch, H	Genetic diversity reduces competition and increases tree growth on a Norway spruce<i> (Picea abies</i> [L.] KARST.) provenance mixing experiment	FOREST ECOLOGY AND MANAGEMENT	Article	Genetic diversity; Structural heterogeneity; Stability of growth; Competition reduction; Clonal trial; Treeallometry	Many recent studies address that diversification of tree species and stand structure can increase the level and stability of growth and other forest functions and services to mitigate natural and human disturbances. Most studies so far focussed on the diversification of tree species mixing and stand structure. The potential of intraspecific genetic diversification in terms of provenance mixture w…	2021	497		http://dx.doi.org/10.1016/j.foreco.2021.119498	WOS:000685086500007
434	J	Di Pierro, EA; Mosca, E; González-Martínez, SC; Binelli, G; Neale, DB; La Porta, N	Adaptive variation in natural Alpine populations of Norway spruce (<i>Picea abies</i> [L.] Karst) at regional scale: Landscape features and altitudinal gradient effects	FOREST ECOLOGY AND MANAGEMENT	Article	Elevation; Topographical barriers; Outlier loci; Genome-environment association; Landscape genetics; Alpine forest	Conifers are key species of many boreal and temperate forests, providing crucial resources to human activities. Adaptation to local climate and long life span make tree species highly susceptible to both short- and long-term environmental changes. Thus, a substantial effect of ongoing climate change on forest viability and production potential is expected. A deeper understanding of the genetic me…	2017	405		http://dx.doi.org/10.1016/j.foreco.2017.09.045	WOS:000413878500032
435	J	Jokipii-Lukkari, S; Sundell, D; Nilsson, O; Hvidsten, TR; Street, NR; Tuominen, H	NorWood: a gene expression resource for evo-devo studies of conifer wood development	NEW PHYTOLOGIST	Article	co-expression network; comparative genomics; cryosection; evo-devo; growth ring; Norway spruce (Picea abies); RNA-sequencing; secondary cell wall	The secondary xylem of conifers is composed mainly of tracheids that differ anatomically and chemically from angiosperm xylem cells. There is currently no high-spatial-resolution data available profiling gene expression during wood formation for any coniferous species, which limits insight into tracheid development. RNA-sequencing data from replicated, high-spatial-resolution section series throu…	2017	216	2	http://dx.doi.org/10.1111/nph.14458	WOS:000427294000017
436	J	Caré, O; Chano, V; Erley, M; Rogge, M; Gailing, O	Circadian rhythm and redox homeostasis candidate genes showed association with shallow elevation in Norway spruce	PLANT BIOLOGY	Article	abiotic and biotic stress; association analysis; candidate genes; elevation; Picea abies; single nucleotide polymorphism (SNP)	The analysis of genetic variation underlying local adaptation in natural populations, together with the response to different external stimuli, is currently a hot topic in forest sciences, with the aim of identifying genetic markers controlling key phenotypic traits of interest for their inclusion in restoration and breeding programs. In Europe, one of the main tree species is Norway spruce (Pice…	2024	26	4	http://dx.doi.org/10.1111/plb.13642	WOS:001196049300001
439	J	Kapeller, S; Lexer, MJ; Geburek, T; Hiebl, J; Schueler, S	Intraspecific variation in climate response of Norway spruce in the eastern Alpine range: Selecting appropriate provenances for future climate	FOREST ECOLOGY AND MANAGEMENT	Article	Climate change impacts; Gaussian response model; Quantitative genetic variation; Provenance test; Picea abies	Enhancing adaptation of forest ecosystems to prospective climate change is a major challenge in current forest management. Beyond potential negative effects of climate change such as decreasing productivity due to an increasing number of drought periods and damages from intensified disturbance regimes, there is also a potential for increasing productivity due to prolonged vegetation periods and h…	2012	271		http://dx.doi.org/10.1016/j.foreco.2012.01.039	WOS:000303030200006
440	J	Litkowiec, M; Lewandowski, A; Raczka, G	Spatial Pattern of the Mitochondrial and Chloroplast Genetic Variation in Poland as a Result of the Migration of <i>Abies alba</i> Mill. from Different Glacial Refugia	FORESTS	Article	hybrid zone; organelle DNA markers; phylogeography; silver fir	Currently, the information on the gene pool of silver fir (Abies alba Mill.) at the northeastern edge of its distribution in Poland is scarce and insufficient. Using the advantage provided by markers with different modes of inheritance, a hypothesis that gene flow via both seeds and pollen contributed to the genetic structure across the entire analyzed region was investigated. The geographic dist…	2016	7	11	http://dx.doi.org/10.3390/f7110284	WOS:000388672000035
441	J	Spinnler, D; Egli, P; Körner, C	Provenance effects and allometry in beech and spruce under elevated CO<sub>2</sub> and nitrogen on two different forest soils	BASIC AND APPLIED ECOLOGY	Article	allocation; biomass; CO2 x soil interaction; environmental change; genotype; tree growth; model ecosystem; Fagus sylvatica; Picea abies	Growth responses to atmospheric CO2 enrichment, enhanced nitrogen (N) supply and different forest soils were studied in four provenances (populations) of Fagus sylvatica and eight provenances (two populations and six clones) of Picea abies. Trees were grown together in realistic model communities in large open-top chambers. Systems with replicated genetic diversity were established on a nutrient-…	2003	4	5	http://dx.doi.org/10.1078/1439-1791-00175	WOS:000186435900009
443	J	Gugerli, F; Sperisen, C; Büchler, U; Magni, F; Geburek, T; Jeandroz, S; Senn, J	Haplotype variation in a mitochondrial tandem repeat of Norway spruce (<i>Picea abies</i>) populations suggests a serious founder effect during postglacial re-colonization of the western Alps	MOLECULAR ECOLOGY	Article	Alpine; conifers; elevation; genetic diversity; phylogeography; population differentiation	Populations from 13 elevational transects of Norway spruce [Picea abies (L.) Karst] across the Alpine range were sampled to elucidate the geographical pattern of genetic variation in relation to postglacial re-colonization and to study elevational effects on haplotypic diversity. We assessed fragment length variation in a tandem repeat region of the mitochondrial (mt) nad1 intron 2. This maternal…	2001	10	5	http://dx.doi.org/10.1046/j.1365-294X.2001.01279.x	WOS:000168692900016
444	J	Stojnic, S; Avramidou, EV; Fussi, B; Westergren, M; Orlovic, S; Matovic, B; Trudic, B; Kraigher, H; Aravanopoulos, FA; Konnert, M	Assessment of Genetic Diversity and Population Genetic Structure of Norway Spruce (<i>Picea abies</i> (L.) Karsten) at Its Southern Lineage in Europe. Implications for Conservation of Forest Genetic Resources	FORESTS	Article	Norway spruce; EST-SSR markers; genetic diversity; conservation	In the present paper we studied the genetic diversity and genetic structure of five Norway spruce (Picea abies (L.) Karsten) natural populations situated in Serbia, belonging to the southern lineage of the species at the southern margin of the species distribution range. Four populations occur as disjunct populations on the outskirts of the Dinaric Alps mountain chain, whereas one is located at t…	2019	10	3	http://dx.doi.org/10.3390/f10030258	WOS:000464460100002
445	J	Chen, J; Källman, T; Ma, XF; Gyllenstrand, N; Zaina, G; Morgante, M; Bousquet, J; Eckert, A; Wegrzyn, J; Neale, D; Lagercrantz, U; Lascoux, M	Disentangling the Roles of History and Local Selection in Shaping Clinal Variation of Allele Frequencies and Gene Expression in Norway Spruce (<i>Picea abies</i>)	GENETICS	Article		Understanding the genetic basis of local adaptation is challenging due to the subtle balance among conflicting evolutionary forces that are involved in its establishment and maintenance. One system with which to tease apart these difficulties is clines in adaptive characters. Here we analyzed genetic and phenotypic variation in bud set, a highly heritable and adaptive trait, among 18 populations …	2012	191	3	http://dx.doi.org/10.1534/genetics.112.140749	WOS:000308999900015
447	J	Magyari, EK; Major, A; Bálint, M; Nédli, J; Braun, M; Rácz, I; Parducci, L	Population dynamics and genetic changes of <i>Picea abies</i> in the South Carpathians revealed by pollen and ancient DNA analyses	BMC EVOLUTIONARY BIOLOGY	Article		Background: Studies on allele length polymorphism designate several glacial refugia for Norway spruce (Picea abies) in the South Carpathian Mountains, but infer only limited expansion from these refugia after the last glaciation. To better understand the genetic dynamics of a South Carpathian spruce lineage, we compared ancient DNA from 10,700 and 11,000-year-old spruce pollen and macrofossils re…	2011	11		http://dx.doi.org/10.1186/1471-2148-11-66	WOS:000289414100002
448	J	Bernhardsson, C; Zan, YJ; Chen, ZQ; Ingvarsson, PK; Wu, HX	Development of a highly efficient 50K single nucleotide polymorphism genotyping array for the large and complex genome of Norway spruce (<i>Picea abies</i> L. Karst) by whole genome resequencing and its transferability to other spruce species	MOLECULAR ECOLOGY RESOURCES	Article	genetic diversity; genome resequencing; genomic selection; Norway spruce; SNP array	Norway spruce (Picea abies L. Karst) is one of the most important forest tree species with significant economic and ecological impact in Europe. For decades, genomic and genetic studies on Norway spruce have been challenging due to the large and repetitive genome (19.6 Gb with more than 70% being repetitive). To accelerate genomic studies, including population genetics, genome-wide association st…	2021	21	3	http://dx.doi.org/10.1111/1755-0998.13292	WOS:000595076400001
449	J	Housset, JM; Tóth, EG; Girardin, MP; Tremblay, F; Motta, R; Bergeron, Y; Carcaillet, C	Tree-rings, genetics and the environment: Complex interactions at the rear edge of species distribution range	DENDROCHRONOLOGIA	Article	Dendrochronology; Grow-climate relationship; Functional trait; Genetic diversity; Subalpine forest	Under climate change, modifications on plants' growth are expected to be the strongest at species margins. Therein, tree acclimation could play a key role as migration is predicted to be too slow to track shifts of bioclimatic envelops. A requirement is, however, that intra-population genetic diversity be high enough for allowing such adaptation of tree populations to climate change. In this stud…	2021	69		http://dx.doi.org/10.1016/j.dendro.2021.125863	WOS:000702860900005
450	J	Phillips, MA; Walter, MH; Ralph, SG; Dabrowska, P; Luck, K; Urós, EM; Boland, W; Strack, D; Rodríguez-Concepcion, M; Bohlmann, J; Gershenzon, J	Functional identification and differential expression of 1-deoxy-D-xylulose 5-phosphate synthase in induced terpenoid resin formation of Norway spruce (<i>Picea abies</i>)	PLANT MOLECULAR BIOLOGY	Article	Ceratocystis polonica; conifer defense; fungal elicitor; isoprenoid biosynthesis; methyl jasmonate; terpenoid synthase; oleoresin; conifer genomics	Conifers produce terpenoid-based oleoresins as constitutive and inducible defenses against herbivores and pathogens. Much information is available about the genes and enzymes of the late steps of oleoresin terpenoid biosynthesis in conifers, but almost nothing is known about the early steps which proceed via the methylerythritol phosphate ( MEP) pathway. Here we report the cDNA cloning and functi…	2007	65	3	http://dx.doi.org/10.1007/s11103-007-9212-5	WOS:000249460400003
451	J	Tsuda, Y; Chen, J; Stocks, M; Källman, T; Sonstebo, JH; Parducci, L; Semerikov, V; Sperisen, C; Politov, D; Ronkainen, T; Väliranta, M; Vendramin, GG; Tollefsrud, MM; Lascoux, M	The extent and meaning of hybridization and introgression between Siberian spruce (<i>Picea obovata</i>) and Norway spruce (<i>Picea abies</i>): cryptic refugia as stepping stones to the west?	MOLECULAR ECOLOGY	Article	divergence; Eurasia; introgression; phylogeography; spruce	Boreal species were repeatedly exposed to ice ages and went through cycles of contraction and expansion while sister species alternated periods of contact and isolation. The resulting genetic structure is consequently complex, and demographic inferences are intrinsically challenging. The range of Norway spruce (Picea abies) and Siberian spruce (Picea obovata) covers most of northern Eurasia; yet …	2016	25	12	http://dx.doi.org/10.1111/mec.13654	WOS:000378941800010
453	J	Senior, JK; Gundale, MJ; Iason, GR; Whitham, TG; Axelsson, EP	Progeny selection for enhanced forest growth alters soil communities and processes	ECOSPHERE	Article	common garden; condensed tannins; genetic legacy effects; growth; intraspecific variation; Picea abies; selective breeding; soil chemical and biological properties	Genetic enhancement of tree species is integral to global forest management practices with mass propagation of enhanced plant material being used to reforest whole landscapes. It is unclear, however, how genetic enhancement of basic traits such as tree growth may influence the function of life supporting soil ecosystems. We studied the potential cascading effects of genetic increases in growth of…	2022	13	2	http://dx.doi.org/10.1002/ecs2.3943	WOS:000760264100036
455	J	Scotti, I; Gugerli, F; Pastorelli, R; Sebastiani, F; Vendramin, GG	Maternally and paternally inherited molecular markers elucidate population patterns and inferred dispersal processes on a small scale within a subalpine stand of Norway spruce (<i>Picea abies</i> [L.] Karst.)	FOREST ECOLOGY AND MANAGEMENT	Article	chloroplast microsatellites; mitochondrial minisatellites; pollen/seed dispersal; demography; spatial autocorrelation	The within-population spatial structure of genetic diversity is shaped by demographic processes, including historical accidents such as forest perturbations. Information drawn from the analysis of the spatial distribution of genetic diversity is therefore inherently linked to demographic-historical processes that ultimately determine the fate of populations. All adult trees and saplings in a 1.4-…	2008	255	11	http://dx.doi.org/10.1016/j.foreco.2008.03.023	WOS:000257019100019
457	J	Vieilledent, G; Courbaud, B; Kunstler, G; Dhôte, JF; Clark, JS	Individual variability in tree allometry determines light resource allocation in forest ecosystems: a hierarchical Bayesian approach	OECOLOGIA	Article	Tree allometry; Hierarchical Bayes; Individual variability; Resource allocation; Succession	Tree species differences in crown size and shape are often highlighted as key characteristics determining light interception strategies and successional dynamics. The phenotypic plasticity of species in response to light and space availability suggests that intraspecific variability can have potential consequences on light interception and community dynamics. Species crown size varies depending o…	2010	163	3	http://dx.doi.org/10.1007/s00442-010-1581-9	WOS:000278838000020
458	J	Makeeva, VM; Smurov, AV; Politov, DV; Belokon, MM; Belokon, YS; Suslova, EG	Comparative Assessment of the Gene Pool and the Viability of Forest Plantations from Moscow and Natural Populations from the Moscow Region by Example of Norway Spruce (<i>Picea abies</i> (L.) Karst.)	RUSSIAN JOURNAL OF GENETICS	Article	genetic diversity; gene pool; population; isoenzymes; Norway spruce; genourbanology	The genetic diversity of four population of Norway spruce (Picea abies (L.) Karst.) in Moscow parks have been studied. For the first time, a comparison of the gene pool of planted stands in urban areas with the gene pool of natural populations and planted stands of the Moscow region investigated earlier revealed a significant reduction in the genetic diversity of planted stands of Moscow parks in…	2018	54	9	http://dx.doi.org/10.1134/S1022795418090090	WOS:000445393300005
459	J	Endrulat, T; Saurer, M; Buchmann, N; Brunner, I	Incorporation and remobilization of <SUP>13</SUP>C within the fine-root systems of individual <i>Abies alba</i> trees in a temperate coniferous stand	TREE PHYSIOLOGY	Article	carbon fluxes and pools; pulse-labelling; stable carbon isotope; silver fir; fine-root cellulose; fine-root starch	Forest ecosystems have a large carbon (C) storage capacity, which depends on their productivity and the residence time of C. Therefore, the time interval between C assimilation and its return to the atmosphere is an important parameter for determining C storage. Especially fine roots (<= 2 mm in diameter) undergo constant replacement and provide a large biomass input to the soil. In this study, w…	2010	30	12	http://dx.doi.org/10.1093/treephys/tpq090	WOS:000284644100004
460	J	Rosner, S; Svetlik, J; Andreassen, K; Borja, I; Dalsgaard, L; Evans, R; Luss, S; Tveito, OE; Solberg, S	Novel Hydraulic Vulnerability Proxies for a Boreal Conifer Species Reveal That Opportunists May Have Lower Survival Prospects under Extreme Climatic Events	FRONTIERS IN PLANT SCIENCE	Article	climatic extremes; conduit wall reinforcement; functional wood anatomy; global warming; Norway spruce; Picea abies; top dieback	Top dieback in 40-60 years old forest stands of Norway spruce [Picea abies (L.) Karst.] in southern Norway is supposed to be associated with climatic extremes. Our intention was to learn more about the processes related to top dieback and in particular about the plasticity of possible predisposing factors. We aimed at (i) developing proxies for P50 based on anatomical data assessed by SilviScan t…	2016	7		http://dx.doi.org/10.3389/fpls.2016.00831	WOS:000377363800001
461	J	Chen, J; Uebbing, S; Gyllenstrand, N; Lagercrantz, U; Lascoux, M; Källman, T	Sequencing of the needle transcriptome from Norway spruce (<i>Picea abies</i> Karst L.) reveals lower substitution rates, but similar selective constraints in gymnosperms and angiosperms	BMC GENOMICS	Article		Background: A detailed knowledge about spatial and temporal gene expression is important for understanding both the function of genes and their evolution. For the vast majority of species, transcriptomes are still largely uncharacterized and even in those where substantial information is available it is often in the form of partially sequenced transcriptomes. With the development of next generati…	2012	13		http://dx.doi.org/10.1186/1471-2164-13-589	WOS:000314646900001
462	J	Sáenz-Romero, C; Kremer, A; Nagy, L; Ujvári-Jármay, E; Ducousso, A; Kóczán-Horváth, A; Hansen, JK; Mátyás, C	Common garden comparisons confirm inherited differences in sensitivity to climate change between forest tree species	PEERJ	Article	Quercus petraea; Picea abies; Pinus sylvestris; Climatic change; Climatic transfer distance; Response function; Mixed model; Forest decline; Assisted migration; Fagus sylvatica	The natural distribution, habitat, growth and evolutionary history of tree species are strongly dependent on ecological and genetic processes in ecosystems subject to fluctuating climatic conditions, but there have been few experimental comparisons of sensitivity between species. We compared the responses of two broadleaved tree species (Fagus sylvatica and Quercus petraea) and two conifer tree s…	2019	7		http://dx.doi.org/10.7717/peerj.6213	WOS:000455766000003
463	J	Cesniene, I; Cesna, V; Miskelyte, D; Novickij, V; Mildaziene, V; Sirgedaite-Seziene, V	Seed Treatment with Cold Plasma and Electromagnetic Field: Changes in Antioxidant Capacity of Seedlings in Different <i>Picea abies</i> (L.) H. Karst Half-Sib Families	PLANTS-BASEL	Article	abiotic stress; antioxidant enzymes; antioxidant activity; biotic stress; chemistry; defense; Norway spruce; physiology	In the context of climate change, methods to improve the resistance of coniferous trees to biotic and abiotic stress are in great demand. The common plant response to exposure to vastly different stressors is the generation of reactive oxygen species (ROS) followed by activation of the defensive antioxidant system. We aimed to evaluate whether seed treatment with physical stressors can activate t…	2024	13	15	http://dx.doi.org/10.3390/plants13152021	WOS:001287887100001
465	J	Polok, K; Zwijacz-Kozica, T; Zielinski, R	Origin assessment of woody mountain pine forms in the Tatra National Park based on transposon insertional polymorphism	SYLWAN	Article	Pinus x rhaetica; DNA markers; SSAP; genetic similarity	Closely related Pinus species, mountain pine (Pinus mugo Turra) and Scots pine (Pinus sylvestris L.), belong to native woody species in the Tatra National Park (TPN, southern Poland). Their occurrence in close proximity can lead to the formation of natural hybrids known as Pinus x rhaetica, which is a woody, often polycormic form. Pinus x rhaetica is described in the TPN, but there has been a gre…	2016	160	7		WOS:000381844600006
466	J	Nowakowska, JA; Lukaszewicz, J; Borys, M; Tereba, A; Konecka, A; Zawadzka, A; Sulkowska, M; Zajaczkowski, P	Origin of the Norway spruce (<i>Picea</i> <i>abies</i> L. Karst.) stands from Bialowiea Forest at the level of Bialystok Regional Directorate of the State Forests based on mitochondrial DNA analysis	SYLWAN	Article	genetic diversity; mitochondrial DNA marker; postglacial migration routes; Bialowiea Forest	Considered to be the most natural of all other Polish stands Picea abies in Bialowieta Forest has suffered severely of bark beetle damages for decades. In order to find out some historical events in native Norway spruce stands diversity at regional level, we carried out the study on polymorphism with DNA markers and performed Principal Coordinate Analysis (PCoA) on the basis of genetic distance m…	2017	161	1		WOS:000394559000005
467	J	Feurdean, A; Willis, KJ	The usefulness of a long-term perspective in assessing current forest conservation management in the Apuseni Natural Park, Romania	FOREST ECOLOGY AND MANAGEMENT	Article	forest management; conservation; past; climate change; human disturbance; carpathians	The forest ecosystem of the Apuseni National Park (ANP) in NW Romania is recognized for its high species and genetic diversity and is protected through various conservation measures. As ANP is the most populated natural park in Romania, the focus is on the need for communities to manage, sustain and prosper by using, exploring and sustaining the natural resources. But what activities are the most…	2008	256	3	http://dx.doi.org/10.1016/j.foreco.2008.04.050	WOS:000258017400028
468	J	Piotti, A; Leonarduzzi, C; Postolache, D; Bagnoli, F; Spanu, I; Brousseau, L; Urbinati, C; Leonardi, S; Vendramin, GG	Unexpected scenarios from Mediterranean refugial areas: disentangling complex demographic dynamics along the Apennine distribution of silver fir	JOURNAL OF BIOGEOGRAPHY	Article	Abies alba; approximate Bayesian computation; glacial refugia; Mediterranean basin; phylogeography; Pleistocene; post-glacial recolonization; nuclear and chloroplast microsatellites; rear edge populations; trans-Adriatic gene flow	AimMediterranean refugial areas are generally underrepresented in large-scale genetic surveys of forest trees. In the case of silver fir (Abies alba Mill.), this has led to divergent hypotheses about the exact location of glacial refugia and the trajectory of recolonization routes. Based on the comprehensive sampling of Apennine populations, we aimed to reconcile discrepancies about the number an…	2017	44	7	http://dx.doi.org/10.1111/jbi.13011	WOS:000403676900010
469	J	Ikonen, VP; Peltola, H; Wilhelmsson, L; Kilpeläinen, A; Väisänen, H; Nuutinen, T; Kellomäki, S	Modelling the distribution of wood properties along the stems of Scots pine (<i>Pinus sylvestris</i> L.) and Norway spruce (<i>Picea abies</i> (L.) Karst.) as affected by silvicultural management	FOREST ECOLOGY AND MANAGEMENT	Article	early wood percentage; wood density; fibre length; tree status; process-based modelling; empirical modelling	In this work, empirical ring-based models were developed to predict the distribution of early wood percentage, wood density and fibre length along the stems of Scots pine (Pinus sylvestris L.) and Norway spruce (Picea abies (L.) Karst.) as affected by silvicultural management. The performance of the ring-based models was also compared for Scots pine and Norway spruce with corresponding disc-based…	2008	256	6	http://dx.doi.org/10.1016/j.foreco.2008.06.039	WOS:000259762700015
471	C	Amyaga, E; Nifontov, S	Selection of nuclear microsatellite loci for specific identification of <i>Larix gmelinii</i> Rupr. and comparison of genetic profiles of Larix to solve agricultural problems	IV SCIENTIFIC-TECHNICAL CONFERENCE FORESTS OF RUSSIA: POLICY, INDUSTRY, SCIENCE AND EDUCATION	Proceedings Paper		Preservation and study of forest plant species diversity is one of the fundamental challenges of modern botany, genetics, and dendrology. Genetic structure determines variability and controls adaptation mechanisms, letting every population adapt to environmental conditions. The most topical issue is genetic study of valuable forest species to ensure their integrity, specific identification, and c…	2019	316		http://dx.doi.org/10.1088/1755-1315/316/1/012016	WOS:000508125400016
472	J	Masternak, K; Sabor, J	Isoenzyme polymorphism in progenies of Norway spruce from selected Krutzsch regions of IPTNS-IUFRO 1964/68 provenance test in Krynica	SYLWAN	Article	Picea abies; isozyme; genetic variation	Masternak K., Sabor J. 2013. Polimorfizm izoenzymowy swierka pospolitego z wybranych regionow Krutzscha testowanych w dogwiadczeniu IPTNS-IUFRO 1964/68 w Krynicy. Sylwan 157 (1): 47-53. The genetic variation of Norway spruce provenances from fourteen geographical regions were tested in the IPTNS-IUFRO 1964/68 experiment in Krynica. The genetic structure of seven isozyme systems coded by eleven lo…	2013	157	1		WOS:000318205300005
473	J	Gugerli, F; Brodbeck, S; Lendvay, B; Dauphin, B; Bagnoli, F; van der Knaap, WO; Tinner, W; Höhn, M; Vendramin, GG; Morales-Molino, C; Schwörer, C	A range-wide postglacial history of Swiss stone pine based on molecular markers and palaeoecological evidence	JOURNAL OF BIOGEOGRAPHY	Article	gene flow; genetic structure; macrofossils; microsatellite markers; pollen; postglacial colonisation; refugial areas	Aim Knowing a species' response to historical climate shifts helps understanding its perspectives under global warming. We infer the hitherto unresolved postglacial history of Pinus cembra. Using independent evidence from genetic structure and demographic inference of extant populations, and from palaeoecological findings, we derive putative refugia and re-colonisation routes.Location European Al…	2023	50	6	http://dx.doi.org/10.1111/jbi.14586	WOS:000959213400001
474	J	Baison, J; Zhou, LH; Forsberg, N; Mörling, T; Grahn, T; Olsson, L; Karlsson, B; Wu, HX; Mellerowicz, EJ; Lundqvist, SO; García-Gil, MR	Genetic control of tracheid properties in Norway spruce wood	SCIENTIFIC REPORTS	Article		Through the use of genome-wide association studies (GWAS) mapping it is possible to establish the genetic basis of phenotypic trait variation. Our GWAS study presents the first such effort in Norway spruce (Picea abies (L). Karst.) for the traits related to wood tracheid characteristics. The study employed an exome capture genotyping approach that generated 178 101 Single Nucleotide Polymorphisms…	2020	10	1	http://dx.doi.org/10.1038/s41598-020-72586-3	WOS:000615379800082
477	J	Calic, I; Bussotti, F; Martínez-García, PJ; Neale, DB	Recent landscape genomics studies in forest trees-what can we believe?	TREE GENETICS & GENOMES	Article	Adaptation; Genotype to environment; Genomics; Picea abies	Landscape genomics is potentially a powerful research field for discovery of genes underlying complex patterns of adaptation in forest ecosystems. The general approach is to search for associations between genetic variation in tree populations and environmental variation in the habitats these trees occupy. For example, environmental data from GIS databases can be associated with single nucleotide…	2016	12	1	http://dx.doi.org/10.1007/s11295-015-0960-0	WOS:000371329700003
478	J	Zukowska, WB; Wachowiak, W	Utility of closely related taxa for genetic studies of adaptive variation and speciation: Current state and perspectives in plants with focus on forest tree species	JOURNAL OF SYSTEMATICS AND EVOLUTION	Review	adaptation; divergence; genetic variation; natural selection; Pinus mugo; P. sylvestris	Studies of adaptation and speciation have greatly benefited from rapid progress of DNA sequencing and genotyping technologies. Comparative genomics of closely related taxa has great potential to advance evolutionary research on genetic architecture of adaptive traits and reproductive isolation. Such studies that utilized closely related plant species and ecotypes have already provided some import…	2016	54	1	http://dx.doi.org/10.1111/jse.12177	WOS:000372910100002
480	J	Kozyrenko, MM; Artyukova, EV; Reunova, GD; Levina, EA; Zhuravlev, YN	Genetic diversity and relationships among Siberian and Far Eastern larches inferred from RAPD analysis	RUSSIAN JOURNAL OF GENETICS	Article		Genetic diversity of larches from six geographically distant regions, Tomsk, Irkutsk, Ulan-Ude (Siberia), and Blagoveshchensk, Khabarovsk, Yuzhno-Sakhalinsk (Far East) was examined by means of RAPD analysis. Tree DNA samples were compared using 457 RAPD loci (97% of which were polymorphic), identified with 17 primers of random sequences. In the samples examined, 32 to 49% of the genes were in het…	2004	40	4	http://dx.doi.org/10.1023/B:RUGE.0000024978.25458.f7	WOS:000220977200010
482	J	Labiszak, B; Zaborowska, J; Wachowiak, W	Patterns of mtDNA variation reveal complex evolutionary history of relict and endangered peat bog pine (Pinus uliginosa)	AOB PLANTS	Article	Endangered species; genetic structure; molecular markers; phylogeography; pines	Estimates of genetic differentiation at intra- and interspecific level are often hindered by the lack of suitable molecular markers. Low phylogeographic resolution limits development of appropriate conservation strategies especially in case of endangered forest tree species with small and disjunct distribution. In this study, we assessed fine-scale genetic structure of relict and endangered peat …	2019	11	2	http://dx.doi.org/10.1093/aobpla/plz015	WOS:000469436900011
483	J	Masternak, K	Genetic variability of phenological forms in selected provenances of Norway spruce of IPTNS-IUFRO 1964/68 experiment test in Poland	AUSTRIAN JOURNAL OF FOREST SCIENCE	Article	Picea abies; IUFRO; isozyme; genetic polymorphism; flushing	Here, we present an analysis of genetic variability of early and late phenological forms of Norway spruce growing on international inventory test IPTNS-IUFRO 1964/68 in Krynica, Poland. The polymorphism of 7 isozyme systems encoded in 11 loci was characterized. Early and late flushing spruce had a similar genetic variability of the following parameters: the mean and effective number of alleles pe…	2015	132	3		WOS:000364518800003
484	J	Korshikov, II; Pirko, NN; Mudrik, EA; Pirko, YV	Maintenance of genetic structure in progenies of marginal mountainous and steppe populations of three species of <i>Pinaceae</i> Lindl. family in Ukraine	SILVAE GENETICA	Article	Pirzaceae Lindl; marginal populations; embryos; allozyme variation; genetic structure	Comparative investigations of the genetic variation have been conducted at 8 to 10 polymorphic allozyme loci in samples of embryos and maternal plants from marginal populations of Abies alba Mill., Pinus pallasiana D. Don and Pinus syluestris var cretacea Kalenicz. ex Kom. in Ukraine. It was found that the allele frequencies of the loci analysed were maintained in progenies of maternal plants of …	2007	56	1	http://dx.doi.org/10.1515/sg-2007-0001	WOS:000244375400001
485	J	Masternak, K; Polak-Berecka, M	Isoenzyme polymorphism of Norway spruce of the Istebna and Tarnawa race and selected provenances tested in IPTNS-IUFRO 1964/68 trial in Krynica	SYLWAN	Article	Picea abies; IUFRO; isoenzymes; genetic variability	In this study the genetic structure of Istebna and Tarnawa plus trees was studied and polymorphism of twenty four provenances of spruce tested in a IPTNS-IUFRO 1964/68 site in Krynica representing selected regions of the species occurrence was analyzed. The genetic diversity was estimated with seven isoenzyme systems encoded in eleven loci. The highest genetic polymorphism was shown by plus trees…	2014	158	7		WOS:000341552500005
486	J	Donnelly, K; Cottrell, J; Ennos, RA; Vendramin, GG; A'Hara, S; King, S; Perry, A; Wachowiak, W; Cavers, S	Reconstructing the plant mitochondrial genome for marker discovery: a case study using Pinus	MOLECULAR ECOLOGY RESOURCES	Article	high-throughput sequencing; marker discovery; mitochondrion; phylogeography; Pinus	Whole-genome-shotgun (WGS) sequencing of total genomic DNA was used to recover similar to 1 Mbp of novel mitochondrial (mtDNA) sequence from Pinus sylvestris (L.) and three members of the closely related Pinus mugo species complex. DNA was extracted from megagametophyte tissue from six mother trees from locations across Europe, and 100-bp paired-end sequencing was performed on the Illumina HiSeq …	2017	17	5	http://dx.doi.org/10.1111/1755-0998.12646	WOS:000415921600010
487	J	Chen, ZQ; Klingberg, A; Hallingbaeck, HR; Wu, HX	Preselection of QTL markers enhances accuracy of genomic selection in Norway spruce	BMC GENOMICS	Article	Genomic prediction; Marker preselection; GWAS; Picea abies	Genomic prediction (GP) or genomic selection is a method to predict the accumulative effect of all quantitative trait loci (QTLs) in a population by estimating the realized genomic relationships between the individuals and by capturing the linkage disequilibrium between markers and QTLs. Thus, marker preselection is considered a promising method to capture Mendelian segregation effects. Using QTL…	2023	24	1	http://dx.doi.org/10.1186/s12864-023-09250-3	WOS:000958027400006
488	J	Poupon, V; Chakraborty, D; Stejskal, J; Konrad, H; Schueler, S; Lstiburek, M	Accelerating Adaptation of Forest Trees to Climate Change Using Individual Tree Response Functions	FRONTIERS IN PLANT SCIENCE	Article	assisted migration; genetic diversity; intraspecific variation; provenance trials; European larch	In forest tree breeding, assisted migration has been proposed to accelerate the adaptive response to climate change. Response functions are currently fitted across multiple populations and environments, enabling selections of the most appropriate seed sources for a specific reforestation site. So far, the approach has been limited to capturing adaptive variation among populations, neglecting tree…	2021	12		http://dx.doi.org/10.3389/fpls.2021.758221	WOS:000727628300001
489	J	Mihai, G; Mirancea, I; Birsan, MV; Dumitrescu, A	Patterns of genetic variation in bud flushing of <i>Abies alba</i> populations	IFOREST-BIOGEOSCIENCES AND FORESTRY	Article	Bud Flushing; Climatic Parameters; Correlations; Genetic Parameters; Genetic Variation; Silver Fir	In the spring of 2007, 51 full-sib and six half-sib families of European silver fir were obtained through controlled and open pollinations from the same clones in a seed orchard. Genetic variation and parameters for bud flushing were determined in two progeny tests established in a nursery. The results indicate a high genetic control of bud flushing of European silver fir. Both the additive and t…	2018	11		http://dx.doi.org/10.3832/ifor2314-011	WOS:000430360400013
490	J	Semerikova, SA; Semerikov, VL	Genetic variation and population differentiation in Siberian fir <i>Abies sibirica</i> Ledeb. inferred from allozyme markers	RUSSIAN JOURNAL OF GENETICS	Article		Genetic variation in 24 populations of Siberian fir Abies sibirica Ledeb. from the Urals, West Siberia, East Siberia, South Siberia, and the Baikal region were examined using, allozyme markers. Three out of fifteen allozyme loci proved to be polymorphic. Heterozygosity He was 6.6-9.6%, which is substantially lower than that in other widely spread boreal conifers. Our results suggest that the Sibe…	2006	42	6	http://dx.doi.org/10.1134/S1022795406060081	WOS:000238765400008
491	J	Raevsky, BV; Ignatenko, RV; Novichonok, EV; Prokopiuk, VM; Kuklina, KK	The Current State of Conifer Species Breeding and Seed Production	LESNOY ZHURNAL-FORESTRY JOURNAL	Review	forest tree breeding; forest seed orchards; progeny tests; breeding seed production; plus trees; forest breeding in Sweden; forest breeding in Finland; forest breeding in Russia; Northwestern Federal District; Pinus sylvestris; Picea abies	The article analyzes and summarizes information on breeding and seed production of the main forest-forming and commercial species for the countries of Northern Europe and Russia: Scots pine (Pinus sylvestris L.) and Norway spruce (Picea abies (L.) H. Karst). It is shown that in the last 40-50 years Sweden and Finland have completed the first (primary) cycle of plus-tree breeding, and the second c…	2022		6	http://dx.doi.org/10.37482/0536-1036-2022-6-9-37	WOS:000926419800001
492	J	Androsiuk, P; Shimono, A; Westin, J; Lindgren, D; Fries, A; Wang, XR	Genetic status of Norway spruce (<i>Picea abies</i>) breeding populations for northern Sweden	SILVAE GENETICA	Article	breeding stock; genetic diversity; long-term breeding; population subdivision; relatedness	Efficient use of any breeding resources requires a good understanding of the genetic value of the founder breeding materials for predicting the gain and diversity in future generations. This study evaluates the distribution of genetic variation and level of relatedness among and within nine breeding populations of Norway spruce for Northern Sweden using nuclear microsatellite markers. A sample se…	2013	62	3	http://dx.doi.org/10.1515/sg-2013-0017	WOS:000327578000008
493	J	Chen, ZQ; Baison, J; Pan, J; Westin, J; Gil, MRG; Wu, HX	Increased Prediction Ability in Norway Spruce Trials Using a Marker X Environment Interaction and Non-Additive Genomic Selection Model	JOURNAL OF HEREDITY	Article	dominance; epistasis; exome capture; Picea abies (L.) Karst	A genomic selection study of growth and wood quality traits is reported based on control-pollinated Norway spruce families established in 2 Northern Swedish trials at 2 locations using exome capture as a genotyping platform. Nonadditive effects including dominance and first-order epistatic interactions (including additive-by-additive, dominance-by-dominance, and additive-by-dominance) and marker-…	2019	110	7	http://dx.doi.org/10.1093/jhered/esz061	WOS:000509541600007
495	J	Bernhardsson, C; Floran, V; Ganea, SL; García-Gil, MR	Present genetic structure is congruent with the common origin of distant Scots pine populations in its Romanian distribution	FOREST ECOLOGY AND MANAGEMENT	Article	Spatial genetic structure; Genetic diversity; Pinus sylvestris; Nad1/nad7 mitotype; Chloroplast SSR; Nuclear SSR; Romania; Hungary	Owing to the fact that mitochondrial, chloroplast and nuclear genomes are differently affected by evolutionary forces, the comparative study of all three genomes in combination with paleobotanical evidences allows for a more accurate interpretation of present genetic make-up. In this study, we analyzed the nad1-nad7 mitotype, 14 cpSSR loci and 10 nSSR loci in 13 Romanian Scots pine (Pious sylvest…	2016	361		http://dx.doi.org/10.1016/j.foreco.2015.10.047	WOS:000368753900012
496	J	Solvin, TM; Puliti, S; Steffenrem, A	Use of UAV photogrammetric data in forest genetic trials: measuring tree height, growth, and phenology in Norway spruce (<i>Picea abies</i>L. Karst.)	SCANDINAVIAN JOURNAL OF FOREST RESEARCH	Article	UAV; drone; Picea abies; growth; phenology; breeding	Phenotyping of genetic resources that are used for development of new improved and adapted forest reproductive materials is costly. Therefore, high-throughput-phenotyping from a standard equipped unmanned aerial vehicle (UAV) with a RGB (red, green, blue) camera was used to develop a canopy height model (CHM) of a dense field trial of 15-year-old trees of Norway spruce. The site represents a typi…	2020	35	7	http://dx.doi.org/10.1080/02827581.2020.1806350	WOS:000564040400001
497	J	Wang, JH; Lu, N; Yi, F; Xiao, Y	Identification of Transposable Elements in Conifer and Their Potential Application in Breeding	EVOLUTIONARY BIOINFORMATICS	Editorial Material	Transposable elements; conifer breeding; mutant library; molecular marker	Transposable elements (TEs) are known to play a role in genome evolution, gene regulation, and epigenetics, representing potential tools for genetics research in and breeding of conifers. Recently, thanks to the development of high-throughput sequencing, more conifer genomes have been reported. Using bioinformatics tools, the TEs of 3 important conifers (Picea abies, Picea glauce, and Pinus taeda…	2020	16		http://dx.doi.org/10.1177/1176934320930263	WOS:000542601900001
498	J	Hapa, M; Dinca, L	LARCH IN APUSENI MOUNTAINS: BETWEEN PRODUCTION AND PROTECTION	INTERNATIONAL JOURNAL OF CONSERVATION SCIENCE	Article	Larch; Stand characteristics; Distribution; Management; Genetic diversity	Larch in the Apuseni mountains can be found in compositions with predominately common beech and sparce with resinous species, mainly in mixtures on average and upper slope, peaking at approximately 1200m but concentrated on the average altitude of 650m, situated on corrugated lands and occupying only 1497.5ha out of 310538ha total forested area managed by the state in Apuseni mountains. The main …	2022	13	4		WOS:000913392700017
499	J	Hallingbäck, HR; Högberg, KA; Säll, H; Lindeberg, J; Johansson, M; Jansson, G	Optimal timing of early genetic selection for sawn timber traits in <i>Picea abies</i>	EUROPEAN JOURNAL OF FOREST RESEARCH	Article	Early selection; Grain angle; Wood density; Sawmill study; Structural quality traits; Quantitative genetics	In breeding Norway spruce, selection for improved growth and survival is performed at age 10-15 years in order to optimize genetic gain per year. We investigated whether a selection based on wood traits such as density and grain angle, measured under bark in the field at the same age would be informative enough with respect to structural quality traits of sawn boards. To achieve this objective, a…	2018	137	4	http://dx.doi.org/10.1007/s10342-018-1123-2	WOS:000439337000012
500	J	Tikhonova, I; Stolyarova, O	Individual sensitivity of <i>Larix sibirica</i> L. in open woodland of the Shira forest-steppe	CONTEMPORARY PROBLEMS OF ECOLOGY	Article		Some indices of individual variability in annual growth of Siberian larch in open woodlands of Khakassia are compared. In the Shira forest-steppe the Siberian larch exhibits high sensitivity of annual growth and diverse responses to changes in vegetative conditions. Stabilizing selection maintains dominance of trees with moderately sensitive annual growth. Such trees are the most vital. It has be…	2008	1	6	http://dx.doi.org/10.1134/S1995425508060118	WOS:000261955500011
501	J	Bínová, Z; Korecky, J; Dvorák, J; Bílu, J; Zádrapová, D; Jansa, V; Lstiburek, M	Genetic Structure of Norway Spruce Ecotypes Studied by SSR Markers	FORESTS	Article	Picea abies (L.) Karst; microsatellite genotyping; genetic variation; three forms	Norway spruce is a widespread and economically highly important tree species in Central Europe which occurs there in different morphotypic forms (also known as ecotypes). Previously established common garden experiments indicated that the morphological differentiation is most likely genetically determined. The genetic structure of Norway spruce morphological variants might be an indicator (marker…	2020	11	1	http://dx.doi.org/10.3390/f11010110	WOS:000513184500110
502	J	Prescher, F; Lindgren, D; Karlsson, B	Genetic thinning of clonal seed orchards using linear deployment may improve both gain and diversity	FOREST ECOLOGY AND MANAGEMENT	Article	genetic thinning; linear deployment; breeding value; seed orchard; effective number; gene diversity	The linear deployment algorithm defines a straight line relationship between the number of ramets and the breeding value of a given clone. However, when used to determine thinning in clonal seed orchards, there is an upper limit, determined by the number of ramets in the seed orchard prior to thinning. Linear deployment thinning maximises genetic gain and effective clone number whilst minimising …	2008	254	2	http://dx.doi.org/10.1016/j.foreco.2007.08.014	WOS:000252763100008
504	J	Besnard, G; Acheré, V; Rampant, PF; Favre, JM; Jeandroz, S	A set of cross-species amplifying microsatellite markers developed from DNA sequence databanks in <i>Picea</i> (Pinaceae)	MOLECULAR ECOLOGY NOTES	Article	DNA sequence databanks; EST; Picea; SSR	Seven codominant genetic markers (of which six are located in gene untranslated transcribed regions) were developed from Picea DNA sequences available in databanks. Primers were designed to specifically amplify by polymerase chain reaction tri-, di- or mononucleotide repeated motifs. They provided single locus length polymorphism on a representative sample of 93 Picea abies individuals. The usefu…	2003	3	3	http://dx.doi.org/10.1046/j.1471-8286.2003.00456.x	WOS:000185225300017
505	J	Korecky, J; Cepl, J; Stejskal, J; Faltinová, Z; Dvorák, J; Lstiburek, M; El-Kassaby, YA	Genetic diversity of Norway spruce ecotypes assessed by GBS-derived SNPs	SCIENTIFIC REPORTS	Article		We investigated the genetic structure of three phenotypically distinct ecotypic groups of Norway spruce (Picea abies) belonging to three elevational classes; namely, low- (acuminata), medium- (europaea), and high-elevation (obovata) form, each represented by 150 trees. After rigorous filtering, we used 1916 Genotyping-by-Sequencing generated SNPs for analysis. Outputs from three multivariate anal…	2021	11	1	http://dx.doi.org/10.1038/s41598-021-02545-z	WOS:000724479000046
506	J	Gupta, AK; Kang, BY; Roy, JK; Rajora, OP	Large scale development of selectively amplified microsatellite polymorphic loci (SAMPL) markers in spruce (<i>Picea</i>)	MOLECULAR ECOLOGY NOTES	Article	AFLP; SAMPL markers; spruce (Picea)	The spruce (Picea) species are ecologically and economically important in Canada. Highly informative markers with high multiplex ratios are needed to assist spruce genomics, genetics, and breeding programs. Selectively amplified microsatellite polymorphic loci (SAMPL) markers are highly suitable for these programs. We have developed, optimized, and characterized a set of 10 new SAMPL primers in c…	2005	5	3	http://dx.doi.org/10.1111/j.1471-8286.2005.00963.x	WOS:000231529400007
508	J	Máchová, P; Cvrcková, H; Trcková, O	EVALUATION OF GENETIC DIVERSITY AND CLONAL IDENTITY OF EUROPEAN LARCH USING MICROSATELLITE MARKERS	REPORTS OF FORESTRY RESEARCH-ZPRAVY LESNICKEHO VYZKUMU	Article	European larch; clonal identity; genetic diversity; microsatellites; seed orchard	The aim of the study was to determine the possibility of using SSR markers for assessing clonal identity of European larch (Larix decidua Mill.) trees in seed orchards and determine the suitability of markers for the analysis of genetic diversity in populations of European larch in the Czech Republic. Total genomic DNA was extracted by DNA Plant Mini Kit (QIAGEN) from young needles taken from 218…	2020	65	4		WOS:000631645100007
509	J	Chen, J; Li, LL; Milesi, P; Jansson, G; Berlin, M; Karlsson, B; Aleksic, J; Vendramin, GG; Lascoux, M	Genomic data provide new insights on the demographic history and the extent of recent material transfers in Norway spruce	EVOLUTIONARY APPLICATIONS	Article	demographic inferences; forest management; Picea abies; population transfer	Primeval forests are today exceedingly rare in Europe, and transfer of forest reproductive material for afforestation and improvement has been very common, especially over the last two centuries. This can be a serious impediment when inferring past population movements in response to past climate changes such as the last glacial maximum (LGM), some 18,000 years ago. In the present study, we genot…	2019	12	8	http://dx.doi.org/10.1111/eva.12801	WOS:000484471100004
510	J	Gerendiain, AZ; Peltola, H; Pulkkinen, P; Ikonen, VP; Jaatinen, R	Differences in growth and wood properties between narrow and normal crowned types of Norway spruce grown at narrow spacing in Southern Finland	SILVA FENNICA	Article	diameter; earlywood; fibre length; height; latewood; stem volume; wood density	In recent years there has been increased interest in the so called narrow crowned Norway spruce (Picea abies f. peudula), which is a rare mutant of Norway spruce (Picea abies (L.) Karsten), as a suitable wood raw material source for pulp and paper production. This is because it is less sensitive to competition than the normal crowned Norway spruce, and thus, could be more productive especially at…	2008	42	3	http://dx.doi.org/10.14214/sf.247	WOS:000257571500008
511	J	Nikkanen, T; Ruotsalainen, S	Variation in flowering abundance and its impact on the genetic diversity of the seed crop in a Norway spruce seed orchard	SILVA FENNICA	Article	Picea abies; clone; ramet; status number; census number	The variation in flowering abundance was studied in a Norway spruce seed orchard, located in southern Finland (62 degrees 13'N, 25 degrees 24'E), consisting of 67 clones from northern Finland (64 degrees -67 degreesN). The flowering variation in 1984-1996 was studied at the annual, clonal and graft level. In addition, the genetic diversity of an imaginary seed crop was estimated using a concept o…	2000	34	3	http://dx.doi.org/10.14214/sf.626	WOS:000166725800002
512	J	Sannikov, SN; Sannikova, NS	The hypothesis of hydrochorous dissemination of populations of conifers	RUSSIAN JOURNAL OF ECOLOGY	Article	Scotch pine; Norway spruce; population; dissemination; anemochory; hydrochory; genetic distance	A comparative analysis of field observations and experiments on the distance and rate of dispersal of self-sown Scotch pine (Pinus sylvestris L.) and Norway spruce (Picea abies (L.) Karst.) progeny has shown that the rate of their hydrochorous dissemination downstream is an order of magnitude higher than the rate of dispersal in upland areas. A hypothesis assigning priority to the role of hydroch…	2007	38	2	http://dx.doi.org/10.1134/S1067413607020014	WOS:000245405700001
514	J	Chen, J; Källman, T; Ma, XF; Zaina, G; Morgante, M; Lascoux, M	Identifying Genetic Signatures of Natural Selection Using Pooled Population Sequencing in <i>Picea abies</i>	G3-GENES GENOMES GENETICS	Article	pooled sequencing; F-ST; allele frequencies; local adaptation	The joint inference of selection and past demography remain a costly and demanding task. We used next generation sequencing of two pools of 48 Norway spruce mother trees, one corresponding to the Fennoscandian domain, and the other to the Alpine domain, to assess nucleotide polymorphism at 88 nuclear genes. These genes are candidate genes for phenological traits, and most belong to the photoperio…	2016	6	7	http://dx.doi.org/10.1534/g3.116.028753	WOS:000379590200018
515	J	Bucci, G; Menozzi, P	Spatial autocorrelation and linkage of Mendelian RAPD markers in a population of <i>Picea abies</i> Karst	MOLECULAR ECOLOGY	Article	genetic markers; isolation by distance; join-count statistics; Norway spruce; spatial autocorrelation; spatial structure	The spatial clustering of single- and di-locus genotypes in a natural, continuous population of Norway spruce was investigated using 69 Mendelian Random Amplified Polymorphic DNA (RAPD) markers that covered about 15% of the species' genome, and whose linkage relationships were known. Spatial autocorrelation techniques and randomization tests, applied to both single- and di-locus genotypes, reveal…	2002	11	3	http://dx.doi.org/10.1046/j.1365-294X.2002.01444.x	WOS:000174424000002
516	J	Semerikov, VL; Semerikova, SA; Khrunyk, YY; Putintseva, YA	Sequence Capture of Mitochondrial Genome with PCR-Generated Baits Provides New Insights into the Biogeography of the Genus <i>Abies</i> Mill	PLANTS-BASEL	Article	intercontinental migrations; mitochondrial DNA; target enrichment; phylogeny; molecular dating	Mitochondrial DNA (mtDNA), being maternally inherited in plants of the family Pinaceae, is an important source of phylogeographic information. However, its use is hindered by a low mutation rate and frequent structure rearrangements. In the present study, we tested the method of genomic libraries enrichment with mtDNA via the sequence capture method yielding mtDNA data which were further used to …	2022	11	6	http://dx.doi.org/10.3390/plants11060762	WOS:000774425400001
517	J	Skroppa, T; Solvin, TM; Steffenrem, A	<i>???????</i>Diallel crosses in <i>Picea abies </i>IV. Genetic variation and inheritance patterns in short-term trials	SILVAE GENETICA	Article	Norway spruce; short-term tests; height growth; phenology; heritability; genetic correlations	The complete diallel cross is the only mating design that provides estimates of variance components of general combining (GCA), specific combining ability (SCA), maternal and reciprocal effects, in addition to heritabilities and genetic correlations. To obtain such estimates, complete diallels were made among 10 trees in each of three natural Norway spruce populations from altitude 300 and 500 m …	2023	72	1	http://dx.doi.org/10.2478/sg-2023-0006	WOS:001013581400002
518	J	Liu, M; Liu, XB; Zhou, P; Jiang, SW; Huang, JG; Dong, ZC	Environmental factors have a major effect in shaping the gene expression of Siberian larch in the Altai Mountains of China	PLANT GENOME	Article		The differentiation of gene expression is an important link between genotype and phenotype and has important contributions to species adaptation and ecosystem evolution. As a major component of the world's forests, boreal forests play an important role in regulating the global climate, and the phenology of tree species has been and is undergoing changes during global warming. Here, to understand …	2022	15	3	http://dx.doi.org/10.1002/tpg2.20240	WOS:000822962800001
519	J	Kelblerová, R; Dvorák, J; Korecky, J	Genetic Diversity Maximization as a Strategy for Resilient Forest Ecosystems: A Case Study on Norway Spruce	FORESTS	Article	core collection; deployment strategy; microsatellites; Picea abies (L; ) Karst	Norway spruce, economically and ecologically one of the most important European forest tree species, rapidly declines due to massive bark beetle outbreaks across many countries. As a prerequisite of ecosystem stability facing climate changes of uncertain predictions, the reforestation management promoting locally adapted resources of broad genetic diversity should be prioritized, especially in na…	2022	13	3	http://dx.doi.org/10.3390/f13030489	WOS:000775378400001
520	J	Otis-Prud'homme, G; DeBlois, J; Pernot, C; Perron, M	High genetic gains in growth and resistance to white pine weevil for the next Norway spruce breeding and propagation populations in Quebec, Canada	CANADIAN JOURNAL OF FOREST RESEARCH	Article; Early Access	Picea abies; genetic selection; progeny trials; Pissodes strobi; selection index	Genetic parameters for growth (height, diameter, and volume) and resistance to the white pine weevil were estimated from 209 Norway spruce families aged 15 or 20 years old. Individual heritability values ranged from low to moderate, while family heritability values were moderate to high. This suggests that there is a genetic control for these variables. A selection index was developed to rank ind…	2024			http://dx.doi.org/10.1139/cjfr-2024-0119	WOS:001361261500001
521	J	Sperisen, C; Büchler, U; Gugerli, F; Mátyás, G; Geburek, T; Vendramin, GG	Tandem repeats in plant mitochondrial genomes:: application to the analysis of population differentiation in the conifer Norway spruce	MOLECULAR ECOLOGY	Article	conifer; gene flow; genetic diversity; migration; nad1 intron; Picea abies	Mitochondrial DNA, widely applied in studies of population differentiation in animals, is rarely used in plants because of its slow rate of sequence evolution and its complex genomic organization. We demonstrate the utility of two polymorphic mitochondrial tandem repeats located in the second intron of the nad1 gene of Norway spruce. Most of the size variants showed pronounced population differen…	2001	10	1	http://dx.doi.org/10.1046/j.1365-294X.2001.01180.x	WOS:000166647100024
522	J	Larchevêque, M; Larocque, GR; Desrochers, A; Tremblay, F; Gaussiran, S; Boutin, R; Brais, S; Beaulieu, J; Daoust, G; Périnet, P	Juvenile productivity of five hybrid poplar clones and 20 genetically improved white and Norway spruces in boreal clay-belt of Quebec, Canada	FORESTRY CHRONICLE	Article	survival; height; root collar diameter; field trial; exotic and native species	Similar to other boreal regions of Canada, northwestern Quebec has abundant lands available for the establishment of high-productivity plantations. However, few genetically improved species have been tested for this region. Three sites were planted with five hybrid poplar clones; 19 families of white spruce (Picea glauca [Moench] Voss) of southern Ontario and Quebec origins; 20 families of Norway…	2010	86	2	http://dx.doi.org/10.5558/tfc86225-2	WOS:000277299300016
523	J	Vischi, M; Jurman, I; Bianchi, G; Morgante, M	Karyotype of norway spruce by multicolor FISH	THEORETICAL AND APPLIED GENETICS	Article	Norway spruce; Picea abies; repetitive DNA; FISH; karyotype	The chromosomes (2n=2x= 24) of Norway spruce are very large since their size reflects the huge amount of genomic DNA (2C=30x10(9) bp). However, the identification of homologous pairs is hampered by their high degree of similarity at the morphological level. Data so far presented in the literature were not sufficient to solve all the ambiguities in chromosome identification. Several genomic Norway…	2003	107	4	http://dx.doi.org/10.1007/s00122-003-1306-0	WOS:000184825300002
524	J	Nikkanen, T	Reproductive phenology in a Norway spruce seed orchard	SILVA FENNICA	Article	Picea abies; flowering; receptive period; pollination; reproductive synchronisation	Reproductive phenology was studied in a Norway spruce seed orchard, located in southern Finland (62 degrees 13'N, 25 degrees 24'E), consisting of 67 clones from northern Finland (64 degrees -67 degreesN). Timing of flowering was determined on the basis of data recorded by a pollen catch meter during 1984-1995, and visual observations made on grafts in 1989, 1992, 1993 and 1995. The genetic and en…	2001	35	1	http://dx.doi.org/10.14214/sf.602	WOS:000167986300004
525	J	Ganthaler, A; Stöggl, W; Mayr, S; Kranner, I; Schüler, S; Wischnitzki, E; Sehr, EM; Fluch, S; Trujillo-Moya, C	Association genetics of phenolic needle compounds in Norway spruce with variable susceptibility to needle bladder rust	PLANT MOLECULAR BIOLOGY	Article	Association genetics; Pathogen defence; Phenolic metabolites; Picea abies; Resistance; Single nucleotide polymorphisms	Accumulation of phenolic needle metabolites in Norway spruce is regulated by many genes with small and additive effects and is correlated with the susceptibility against fungal attack. Norway spruce accumulates high foliar concentrations of secondary phenolic metabolites, with important functions for pathogen defence responses. However, the molecular genetic basis underlying the quantitative vari…	2017	94	3	http://dx.doi.org/10.1007/s11103-017-0589-5	WOS:000402086700001
526	J	Sedelnikova, TS; Muratova, EN	Specific karyological features of Siberian stone pine (<i>Pinus sibirica</i> du tour) in western Siberian bogs	RUSSIAN JOURNAL OF ECOLOGY	Article	Siberian stone pine; bog; karyotype; secondary constrictions; chromosome and genome aberrations	The results of a karyological study on Siberian stone pines growing in the bog demonstrated differences from the populations of this species studied earlier with respect to sizes of chromosomes and location of secondary constrictions. The number of nucleolar organizer regions in the chromosomes of Siberian stone pine trees growing in the bog was larger than in other populations. A wide spectrum o…	2002	33	5	http://dx.doi.org/10.1023/A:1020232524851	WOS:000178621900001
528	J	Jansen, S; Konrad, H; Geburek, T	The extent of historic translocation of Norway spruce forest reproductive material in Europe	ANNALS OF FOREST SCIENCE	Review	Picea abies; Afforestation; Historic seed transfer; Seed trade	Key message Norway spruce seed has been traded extensively for at least three centuries throughout the natural distribution range in Europe and beyond. However, our knowledge about these transfers is limited. Historic data are essential tools to trace back human-mediated gene flow and for interpretation of recent genetic studies. Context Human-mediated gene flow can potentially have a major impac…	2017	74	3	http://dx.doi.org/10.1007/s13595-017-0644-z	WOS:000407478600009
529	J	Steffenrem, A; Saranpää, P; Lundqvist, SO; Skroppa, T	Variation in wood properties among five full-sib families of Norway spruce (<i>Picea abies</i>)	ANNALS OF FOREST SCIENCE	Article	genetic variation; wood quality; modulus of elasticity; modulus of rupture; tree improvement	Genetic- and environmental variation and correlation patterns were characterized for modulus of elasticity (MOE), modulus of rupture (MOR) and related wood traits: latewood proportion, wood density, spiral grain, microfibril angle and lignin content in five full- sib families of Norway spruce. The families were evaluated on the basis of clearwood specimens from the juvenile - mature wood transiti…	2007	64	8	http://dx.doi.org/10.1051/forest:2007062	WOS:000251157600001
530	J	Chmura, DJ; Guzicka, M; Rozkowski, R	Accumulation of standing aboveground biomass carbon in Scots pine and Norway spruce stands affected by genetic variation	FOREST ECOLOGY AND MANAGEMENT	Article	Allometric equations; Biomass; Provenance; Population; Picea abies; Pinus sylvestris	The area of planted forests increases worldwide and those forests have a potential to contribute to climate change mitigation. Often the genetically improved planting material is used for reforestation, but its potential to accumulate more carbon (C) in biomass through enhanced or faster growth is not fully appreciated. The aim of this study was to investigate variation among native Scots pine an…	2021	496		http://dx.doi.org/10.1016/j.foreco.2021.119476	WOS:000675529900003
532	J	Chen, ZQ; Zan, YJ; Milesi, PR; Zhou, LH; Chen, J; Li, LL; Cui, BB; Niu, SH; Westin, J; Karlsson, B; García-Gil, MR; Lascoux, M; Wu, HX	Leveraging breeding programs and genomic data in Norway spruce (<i>Picea abies</i> L. Karst) for GWAS analysis	GENOME BIOLOGY	Article	Norway spruce; Frost damage; Genome-wide association study; Wood quality; Budburst stage; MAP3K gene	BackgroundGenome-wide association studies (GWAS) identify loci underlying the variation of complex traits. One of the main limitations of GWAS is the availability of reliable phenotypic data, particularly for long-lived tree species. Although an extensive amount of phenotypic data already exists in breeding programs, accounting for its high heterogeneity is a great challenge. We combine spatial a…	2021	22	1	http://dx.doi.org/10.1186/s13059-021-02392-1	WOS:000664094600002
533	J	Capador-Barreto, HD; Bernhardsson, C; Milesi, P; Vos, I; Lundén, K; Wu, HX; Karlsson, B; Ingvarsson, PK; Stenlid, J; Elfstrand, M	Killing two enemies with one stone? Genomics of resistance to two sympatric pathogens in Norway spruce	MOLECULAR ECOLOGY	Article	cline; disease resistance; genome-wide association study; Picea abies; pleiotropy; root-rot	Trees must cope with the attack of multiple pathogens, often simultaneously during their long lifespan. Ironically, the genetic and molecular mechanisms controlling this process are poorly understood. The objective of this study was to compare the genetic component of resistance in Norway spruce to Heterobasidion annosum s.s. and its sympatric congener Heterobasidion parviporum. Heterobasidion ro…	2021	30	18	http://dx.doi.org/10.1111/mec.16058	WOS:000681286200001
534	J	Benowicz, A; Krakowski, J; Rweyongeza, D	Growth and survival of Siberian larch in Alberta at the species, population, and family levels	CANADIAN JOURNAL OF FOREST RESEARCH	Article	Siberian larch; exotic species; growth; genetic variance; provenance	Survival and growth of Siberian larch (SL, Larix sibirica Ledeb.) were compared with those of three conifer species native to Alberta, Canada: lodgepole pine (LP; Pinus contorta var. latifolia Engelm. ex S. Watson), white spruce (WS, Picea glauca (Moench) Voss), and jack pine (JP, Pinus banksiana Lamb.) at 12, 10, and 3 trial locations, respectively. The average data age was 18 years (range: 3 to…	2019	49	9	http://dx.doi.org/10.1139/cjfr-2019-0014	WOS:000482565100003
535	J	Arcade, A; Anselin, F; Rampant, PF; Lesage, MC; Pâques, LE; Prat, D	Application of AFLP, RAPD and ISSR markers to genetic mapping of European and Japanese larch	THEORETICAL AND APPLIED GENETICS	Article	Larix; linkage map; RAPD; AFLP; ISSR; genetic mapping	Genetic linkage maps have been increasingly developed for a wide variety of plants, using segregating populations such as F2S Or backcrosses between inbred lines. These pedigrees are rarely available in outbred species like forest trees which have long generation times. Thus genetic mapping studies have to use peculiar pedigrees and markers in appropriate configurations. We constructed single-tre…	2000	100	2	http://dx.doi.org/10.1007/s001220050039	WOS:000085197500018
536	J	Zaborowska, J; Labiszak, B; Perry, A; Cavers, S; Wachowiak, W	Candidate Genes for the High-Altitude Adaptations of Two Mountain Pine Taxa	INTERNATIONAL JOURNAL OF MOLECULAR SCIENCES	Article	candidate genes; high-altitude adaptations; mountain pines; outlier loci; Pinus; SNP genotyping array	Mountain plants, challenged by vegetation time contractions and dynamic changes in environmental conditions, developed adaptations that help them to balance their growth, reproduction, survival, and regeneration. However, knowledge regarding the genetic basis of species adaptation to higher altitudes remain scarce for most plant species. Here, we attempted to identify such corresponding genomic r…	2021	22	7	http://dx.doi.org/10.3390/ijms22073477	WOS:000638624900001
537	J	Hosius, B; Leinemann, L; Bergmann, F; Maurer, W; Tabel, U; Eder, W	Species diversity and genetic diversity - Is there any relationship?	ALLGEMEINE FORST UND JAGDZEITUNG	Article	Picea abies; Fagus sylvatica; genetic diversity; species diversity; nature forest reserve	It is attempted in this pilot study to establish possible relationships between the values of genetic diversity and species diversity for Norway spruce-beech forest communities. The object of this study comprises several natural regeneration areas in a nature forest reserve composed of different proportions of these two forest tree species (Tab. 1). Genetic diversity based on allele frequencies w…	2001	172	45813		WOS:000169632600002
538	J	Bucci, G; Vendramin, GG	Delineation of genetic zones in the European Norway spruce natural range: preliminary evidence	MOLECULAR ECOLOGY	Article	breeding; chloroplast microsatellite; genetic resources; kriging; Picea abies Karst.; spatial statistics	We applied geostatistics to previously reported chloroplast simple sequence repeats (cpSSR) haplotype frequency data from 95 European Norway spruce populations to provide preliminary evidence about the following issues: (i) delineation of genetically homogeneous regions ('genetic zones'); (ii) prediction of their haplotype frequencies and definition of related criteria to be applied for provenanc…	2000	9	7	http://dx.doi.org/10.1046/j.1365-294x.2000.00946.x	WOS:000088579300009
541	J	Piovani, P; Leonardi, S; Piotti, A; Menozzi, P	Conservation genetics of small relic populations of silver fir (<i>Abies alba</i> Mill.) in the northern Apennines	PLANT BIOSYSTEMS	Article	cpSSR markers; fragmentation; genetic variability; peripheral populations; post-glacial re-colonisation	Small and isolated silver fir populations from the Emilian Apennines (northern Italy) were studied to assess their level of genetic variation and their relationship with Alpine populations. We investigated the variability of two chloroplast microsatellites to analyse the within-population genetic variability of four peripheral and fragmented Apennine populations and to determine their phylogeneti…	2010	144	3	http://dx.doi.org/10.1080/11263504.2010.496199	WOS:000282587900018
543	J	Matisons, R; Zeltins, P; Danusevicius, D; Dzerina, B; Desaine, I; Jansons, A	Genetic control of intra-annual height growth in 6-year-old Norway spruce progenies in Latvia	IFOREST-BIOGEOSCIENCES AND FORESTRY	Article	Height Growth Rate; Growing Period; Heritability; Picea Abies; Local Populations	Coupling growth with periods of favourable weather conditions minimizes risks of frost damage and maximizes annual height increment. The phenology of the formation of height increment is therefore a trait related to the adaptability of trees to annual weather fluctuations. Strong genetic control of the timing of the onset and cessation of shoot elongation has been reported for Norway spruce, but …	2019	12		http://dx.doi.org/10.3832/ifor2777-012	WOS:000467268400006
544	J	Schulte, L; Bernhardt, N; Stoof-Leichsenring, K; Zimmermann, HH; Pestryakova, LA; Epp, LS; Herzschuh, U	Hybridization capture of larch (<i>Larix</i> Mill.) chloroplast genomes from sedimentary ancient DNA reveals past changes of Siberian forest	MOLECULAR ECOLOGY RESOURCES	Article	chloroplast genome; hybridization capture; Larix; sediment core; sedimentary ancient DNA; target enrichment	Siberian larch (Larix Mill.) forests dominate vast areas of northern Russia and contribute important ecosystem services to the world. It is important to understand the past dynamics of larches in order to predict their likely response to a changing climate in the future. Sedimentary ancient DNA extracted from lake sediment cores can serve as archives to study past vegetation. However, the traditi…	2021	21	3	http://dx.doi.org/10.1111/1755-0998.13311	WOS:000618206400001
545	J	Nowakowska, JA; Hsiang, T; Patynek, P; Sterenczak, K; Olejarski, I; Oszako, T	Health Assessment and Genetic Structure of Monumental Norway Spruce Trees during A Bark Beetle (<i>Ips typographus</i>L.) Outbreak in the Bialowie(z) over dota Forest District, Poland	FORESTS	Article	genetic variability; lowland natural forest; Picea abies; private alleles; remote sensing	A current ongoing unprecedented outbreak ofIps typographus(L.) (Coleoptera, Curculionidae, Scolytinae) in the Bialowie(z) over dota Primeval Forest (BPF) has nearly eliminated Norway spruce (Picea abiesL. Karst) as a major forest tree species there, since over 1 million trees have died. In this part of Europe, Norway spruce has grown for hundreds of years, previously accounting for 30% of forest …	2020	11	6	http://dx.doi.org/10.3390/f11060647	WOS:000551269900001
546	J	Yi, F; Ling, JJ; Xiao, Y; Zhang, HG; Ouyang, FQ; Wang, JH	ConTEdb: a comprehensive database of transposable elements in conifers	DATABASE-THE JOURNAL OF BIOLOGICAL DATABASES AND CURATION	Article		Conifers are the largest and most ubiquitous group of gymnosperms and have significant ecological significance and economic importance. However, the huge and complex genomes have hindered the sequencing and mining of conifer genomes. In this study, we identified 413 423 transposable elements (TEs) from Picea abies, Picea glauca and Pinus taeda using a combination of multiple approaches and classi…	2018			http://dx.doi.org/10.1093/database/bay131	WOS:000453807100002
547	J	Jansson, G; Jonsson, A; Eriksson, G	Use of trait combinations for evaluating juvenile-mature relationships in <i>Picea abies</i> (L.)	TREE GENETICS & GENOMES	Article		One of the aims of retrospective early tests in growth chambers is to find juvenile traits that can be used as predictors of future growth. As growth is a complex trait it has been difficult to find a relationship between results from field tests and single juvenile traits measured in the growth chamber. The objective of this study was to analyse whether using a combination of juvenile traits mea…	2005	1	1	http://dx.doi.org/10.1007/s11295-005-0003-3	WOS:000244895700004
548	J	Dauphin, B; Rellstab, C; Schmid, M; Zoller, S; Karger, DN; Brodbeck, S; Guillaume, F; Gugerli, F	Genomic vulnerability to rapid climate warming in a tree species with a long generation time	GLOBAL CHANGE BIOLOGY	Article	Allele frequency shift; Alps; climate change; conifer; ecological genomics; genomic offset; local adaptation; risk of non&#8208; adaptedness	The ongoing increase in global temperature affects biodiversity, especially in mountain regions where climate change is exacerbated. As sessile, long-lived organisms, trees are especially challenged in terms of adapting to rapid climate change. Here, we show that low rates of allele frequency shifts in Swiss stone pine (Pinus cembra) occurring near the treeline result in high genomic vulnerabilit…	2021	27	6	http://dx.doi.org/10.1111/gcb.15469	WOS:000600265200001
551	C	Libiete-Zalite, Z; Jansons, A	INFLUENCE OF GENETIC FACTORS ON NORWAY SPRUCE (<i>PICEA</i> <i>ABIES</i> (L.) KARST.) ABOVE-GROUND BIOMASS AND ITS DISTRIBUTION	RESEARCH FOR RURAL DEVELOPMENT 2011, VOL 2	Proceedings Paper	Norway spruce; above-ground biomass; genetic factors	It is essential to have information on the tree biomass due to the fact that it is an important ecosystem pool for reporting changes in carbon stocks of forests and increased attempts to diversify the energy sources. In Latvia, comparatively few studies have focused on this topic so far. Our study was conducted on two 36 - 38 years old Norway spruce plantations. Detailed stem analysis of 39 trees…	2011				WOS:000378593000007
554	J	Labiszak, B; Zaborowska, J; Wójkiewicz, B; Wachowiak, W	Molecular and paleo-climatic data uncover the impact of an ancient bottleneck on the demographic history and contemporary genetic structure of endangered<i>Pinus uliginosa</i>	JOURNAL OF SYSTEMATICS AND EVOLUTION	Article	bottleneck; conservation management; ecological niche modeling; endangered species; phylogeographic modeling; pines; population isolation; population structure	With the current rate of biodiversity loss, conservation management practices require a comprehensive understanding of eco-evolutionary relationships, history, and genetic structure of species. Assessments of genetic diversity are crucial, especially in rare, endemic, or threatened forest tree species with small and isolated populations, such as peat bog pine (Pinus uliginosaN.). Here, we used a …	2021	59	3	http://dx.doi.org/10.1111/jse.12573	WOS:000563119500001
555	J	Ausin, I; Feng, SH; Yu, CW; Liu, WL; Kuo, HY; Jacobsen, EL; Zhai, JX; Gallego-Bartolome, J; Wang, L; Egertsdotter, U; Street, NR; Jacobsen, SE; Wang, HF	DNA methylome of the 20-gigabase Norway spruce genome	PROCEEDINGS OF THE NATIONAL ACADEMY OF SCIENCES OF THE UNITED STATES OF AMERICA	Article	gymnosperms; Norway spruce; DNA methylation; small RNA; genome size	DNA methylation plays important roles in many biological processes, such as silencing of transposable elements, imprinting, and regulating gene expression. Many studies of DNA methylation have shown its essential roles in angiosperms (flowering plants). However, few studies have examined the roles and patterns of DNA methylation in gymnosperms. Here, we present genome-wide high coverage single-ba…	2016	113	50	http://dx.doi.org/10.1073/pnas.1618019113	WOS:000389696700013
557	J	Chen, ZQ; Gil, MRG; Karlsson, B; Lundqvist, SO; Olsson, L; Wu, HX	Inheritance of growth and solid wood quality traits in a large Norway spruce population tested at two locations in southern Sweden	TREE GENETICS & GENOMES	Article	Wood properties; Picea abies; Early selection; Genetic parameters; Genetic gain	Unfavorable genetic correlations between growth and wood quality traits are one of the biggest challenges in advanced conifer breeding programs. To examine and deal with such correlation, increment cores were sampled at breast height from 5,618 trees in 524 open-pollinated families in two 21-year-old Norway spruce progeny trials in southern Sweden, and age trends of genetic variation, genetic cor…	2014	10	5	http://dx.doi.org/10.1007/s11295-014-0761-x	WOS:000342229000016
558	J	Boratynska, K; Golab, Z; Labiszak, B; Niemczyk, W; Sobierajska, KI; Ufnalski, K; Wachowiak, W; Boratynski, A	Are There Any Traces of <i>Pinus uliginosa</i> in the Stolowe Mountains Outside the Wielkie Torfowisko Batorowskie and Bledne Skaly?	ACTA SOCIETATIS BOTANICORUM POLONIAE	Article	biostatistics; hybridization; genetic variation; morphological variation; Pinus mugo; Pinus uliginosa; Sudetes	Pinus sylvestris (Scots pine) and taxa from the P. mugo (mountain pine) complex hybridize in contact zones producing morphologically-intermediate fertile hybrids. However, the hybrid specimens sometimes express only the P. sylvestris phenotype. Such cryptic hybrids were detected among P. sylvestris and P. uliginosa in the western part of Bledne Skaly in the Stolowe Mountains, where the pines grow…	2021	90		http://dx.doi.org/10.5586/asbp.904	WOS:000693026900001
559	J	Cvjetkovic, B; Konnert, M; Fussi, B; Mataruga, M; Sijacic-Nikolic, M; Danicic, V; Lucic, A	NORWAY SPRUCE (<i>Picea abies</i> Karst.) VARIABILITY IN PROGENY TESTS IN BOSNIA AND HERZEGOVINA	GENETIKA-BELGRADE	Article	Norway spruce; nSSR markers; progeny tests; Bosnia and Herzegovina	Norway spruce is one of the most important economic species is Bosnia and Herzegovina. It is the species at the edge of its natural range; nevertheless it attains significant growth and yield results. The species is often used for afforestation purposes. In the previous period, 4 progeny tests of Norway spruce were established in Bosnia and Herzegovina. The offspring from 6 natural populations: H…	2017	49	1	http://dx.doi.org/10.2298/GENSR1701259C	WOS:000405684200023
560	J	Skroppa, T; Solvin, TM; Steffenrem, A	Diallel crosses in Picea abies III. Variation and inheritance patterns in nursery trials	SILVAE GENETICA	Article	Norway spruce; germination; height growth; bud set; maternal effects; heritability	The complete diallel cross is the only mating design that provides estimates of variance components of general combining (GCA), specific combining ability (SCA), maternal and reciprocal effects, in addition to heritabilities and genetic correlations. To obtain such estimates, complete diallels were made among 10 trees in each of three natural Norway spruce populations from altitude 300 and 500 m …	2023	72	1	http://dx.doi.org/10.2478/sg-2023-0005	WOS:001013581400001
561	J	Wachowiak, W; Zaborowska, J; Labiszak, B; Perry, A; Zucca, GM; González-Martínez, SC; Cavers, S	Molecular signatures of divergence and selection in closely related pine taxa	TREE GENETICS & GENOMES	Article	Nucleotide polymorphisms; Nuclear loci; mtDNA; Local adaptation; DNA sequencing; Speciation	Efforts to detect loci under selection in plants have mostly focussed on single species. However, assuming that intraspecific divergence may lead to speciation, comparisons of genetic variation within and among recently diverged taxa can help to locate such genes. In this study, coalescent and outlier detection methods were used to assess nucleotide polymorphism and divergence at 79 nuclear gene …	2018	14	6	http://dx.doi.org/10.1007/s11295-018-1296-3	WOS:000448447600001
562	J	Prach, M; Bednár, P; Fér, T	IS EUROPEAN LARCH IN THE NÍZKÝ JESENÍK MTS. REALLY OF THE JESENÍKY TYPE? A PERSPECTIVE OF MOLECULAR METHODS	REPORTS OF FORESTRY RESEARCH-ZPRAVY LESNICKEHO VYZKUMU	Article	European larch; DNA; microsatellite analysis; phylogeography; Jeseniky Mts.; Alps	European larch (Larix decidua Mill.) is an important tree species commonly used in managed forests of central Europe. However, its genetic structure, post-glacial range dynamics, and consequent nativity status are poorly understood. Here we provide the first study focusing on the genetic structure of in situ larch populations in the north-eastern Czech Republic using molecular genetics. Most of t…	2023	68	4	http://dx.doi.org/10.59269/ZLV/2023/4/708	WOS:001143579900003
563	J	Piotti, A; Garbarino, M; Avanzi, C; Berretti, R; Motta, R; Piovani, P; Leonardi, S	Influence of Spatiotemporal Dynamics on the Fine-Scale Spatial Genetic Structure of Differently Managed <i>Picea abies</i> Stands	FORESTS	Article	population genetics; Norway spruce; forest management; wood pasture; dendroecology; gene flow; spatial analysis; age structure; Eastern Alps; genetic clustering	The tandem analysis of dendrochronological and genetic data is piquing forest ecologists' interest and represents a promising approach for studying the temporal development of genetic structure in forest tree populations. Such multidisciplinary approach can help elucidate to what extent different management practices have impacted the fine-scale spatial genetic structure of forest stands through …	2018	9	10	http://dx.doi.org/10.3390/f9100622	WOS:000448550700041
564	J	Lu, N; Zhu, TQ; Ouyang, FQ; Xia, Y; Li, QF; Jia, ZR; Hu, JW; Ling, JJ; Ma, WJ; Yang, GJ; Zhang, HG; Kong, LS; Wang, JH	PICEAdatabase: a web database for <i>Picea</i> omics and phenotypic information	DATABASE-THE JOURNAL OF BIOLOGICAL DATABASES AND CURATION	Article		Picea belongs to the Pinaceae family and is a famous commercial tree species because of its straight trunk and excellent timber traits. Recently, omics have been widely used for fundamental and mechanism studies on Picea plants. To improve the accessibility to omics and phenotypic data and facilitate further studies, we compiled the sequences of 2 chloroplast genomes (Picea crassifolia and Picea …	2019			http://dx.doi.org/10.1093/database/baz089	WOS:000483132900001
565	J	Yakovlev, IA; Asante, DKA; Fossdal, CG; Junttila, O; Johnsen, O	Differential gene expression related to an epigenetic memory affecting climatic adaptation in Norway spruce	PLANT SCIENCE	Article	Epigenetic; Bud set; Subtracted libraries; Gene expression; Picea abies	In Norway spruce, the temperature during zygotic embryogenesis appears to adjust an adaptive epigenetic memory in the progeny that may regulate bud phenology and cold acclimation. Conditions colder than normal advance the timing whilst temperatures above normal delay the onset of these processes and altered performance is long lasting in progeny with identical genetic background. As a step toward…	2011	180	1	http://dx.doi.org/10.1016/j.plantsci.2010.07.004	WOS:000284814400016
566	J	Szczepanski, S; Labiszak, B; Wachowiak, W	Development of a SNaPshot assay for the genotyping of organellar SNPs in four closely related pines	DENDROBIOLOGY	Article	genetic diversity; mtDNA; hybridization; Pinus; SNP genotyping; organelle DNA	Mitochondrial (mtDNA) and chloroplast (cpDNA) polymorphisms are valuable resources to study past demographic changes, phylogenetics and evolution, especially in forest tree species, where these genomes are haploid and uniparentally transferred. The organellar markers were usually scored separately using direct sequencing or PCR-based approaches, which can be time-consuming and expensive, especial…	2023	90		http://dx.doi.org/10.12657/denbio.090.006	WOS:001158385700006
567	J	Klisz, M; Buras, A; Sass-Klaassen, U; Puchalka, R; Koprowski, M; Ukalska, J	Limitations at the Limit? Diminishing of Genetic Effects in Norway Spruce Provenance Trials	FRONTIERS IN PLANT SCIENCE	Article	radial growth; G x E; Picea abies; drought; phenotypic plasticity	Provenance trials are used to study the effects of tree origin on climate-growth relationships. Thereby, they potentially identify provenances which appear more resilient to anticipated climate change. However, when studying between provenance variability in growth behavior it becomes important to address potential effects related to site marginality in the context of provenance trials. In our st…	2019	10		http://dx.doi.org/10.3389/fpls.2019.00306	WOS:000461107200002
568	J	Kaliniewicz, Z; Markowski, P; Anders, A; Tylek, P; Krzysiak, Z; Fura, S	Influence of the age of parent stand on selected physical properties of Norway spruce seeds	SYLWAN	Article	tree age; seeds; properties; variation; correlation; sorting; Picea abies	The objective of this study was to determine the influence of the age of parent tree stand on selected physical properties of Norway spruce seeds to improve the efficiency of seed separation processes. Seeds were harvested in a forest complex located in the seed zone No. 202, in the municipality of Kruklanki in the Borki Forest District (N Poland) during mast years (1999, 2004, 2007 and 2012). Th…	2017	161	7		WOS:000411908500003
570	J	Schueler, S; Kapeller, S; Konrad, H; Geburek, T; Mengl, M; Bozzano, M; Koskela, J; Lefe'vre, F; Hubert, J; Kraigher, H; Longauer, R; Olrik, DC	Adaptive genetic diversity of trees for forest conservation in a future climate: a case study on Norway spruce in Austria	BIODIVERSITY AND CONSERVATION	Article	Forest genetic resources; Climate response; Intraspecific variation; Adaptation; Picea abies; Genetic variation	Genetic resources of forest trees are considered as a key factor for the persistence of forest ecosystems because the ability of tree species to survive under changing climate depends strongly on their intraspecific variation in climate response. Therefore, utilizing available genetic variation in climate response and planting alternative provenances suitable for future climatic conditions is con…	2013	22	5	http://dx.doi.org/10.1007/s10531-012-0313-3	WOS:000319140500004
571	J	Bozhko, M; Riegel, R; Schubert, R; Müller-Starck, G	A cyclophilin gene marker confirming geographical differentiation of Norway spruce populations and indicating viability response on excess soil-born salinity	MOLECULAR ECOLOGY	Article	cyclophilin; EST-PCR markers; Picea abies; population differentiation; salinity tolerance	A newly identified cyclophilin-encoding cDNA clone was used to design a codominant inherited EST-PCR marker in Norway spruce. The study of the current minor polymorphism revealed a geographically structured differentiation pattern across 17 test populations, showing a slight clinal variation south-north through Europe. Based on the frequency of alleles, isolation-by-distance analysis and the Ewen…	2003	12	11	http://dx.doi.org/10.1046/j.1365-294X.2003.01983.x	WOS:000186076800026
573	J	Baranowska, M; Barzdajn, W; Korzeniewicz, R; Kowalkowski, W; Lukowski, A; Behnke-Borowczyk, J; Hodzic, MM	The Community of Fine Root Fungi of Silver Fir<i> (Abies alba</i> Mill.) Saplings	SEEFOR-SOUTH-EAST EUROPEAN FORESTRY	Article	Lower Silesia; Miedzylesie Forest District; nursery; restoration; Sudeten Mountains	This study aimed to assess the biodiversity of fungi colonizing the fine roots (diameter up to 2 mm) of 3-year-old silver fir saplings from areas of Miedzylesie Forest District in Poland. It was hypothesized that quantitatively and qualitatively, mycorrhizal fungi would be the dominant fungi in root communities of silver fir. DNA extraction was performed using Plant Genomic DNA purification. The …	2023	14	2	http://dx.doi.org/10.15177/seefor.23-13	WOS:001134573300002
575	J	De La Torre, AR; Birol, I; Bousquet, J; Ingvarsson, PK; Jansson, S; Jones, SJM; Keeling, CI; MacKay, J; Nilsson, O; Ritland, K; Street, N; Yanchuk, A; Zerbe, P; Bohlmann, J	Insights into Conifer Giga-Genomes	PLANT PHYSIOLOGY	Article		Insights from sequenced genomes of major land plant lineages have advanced research in almost every aspect of plant biology. Until recently, however, assembled genome sequences of gymnosperms have been missing from this picture. Conifers of the pine family (Pinaceae) are a group of gymnosperms that dominate large parts of the world's forests. Despite their ecological and economic importance, coni…	2014	166	4	http://dx.doi.org/10.1104/pp.114.248708	WOS:000346016400009
578	J	Nakazawa, F; Suyama, Y; Imura, S; Motoyama, H	Species Identification of <i>Pinus</i> Pollen Found in Belukha Glacier, Russian Altai Mountains, Using a Whole-Genome Amplification Method	FORESTS	Article	pollen; DNA; glacier; Pinus; Altai; pollen source	Pollen taxa in sediment samples can be identified based on morphology. However, closely related species do not differ substantially in pollen morphology, and accurate identification is generally limited to genera or families. Because many pollen grains in glaciers contain protoplasm, genetic information obtained from pollen grains should enable the identification of plant taxa at the species leve…	2018	9	8	http://dx.doi.org/10.3390/f9080444	WOS:000443254400003
579	J	Kovacevic, D; Nikolic, B; Mladenovic Drinic, S; Bojovic, S; Dodos, T; Rajcevic, N; Marin, PD	GENETIC RELATIONSHIPS AMONG SOME <i>Pinus, Picea</i> AND <i>Abies</i> SPECIES REVEALED BY RAPD MARKERS	GENETIKA-BELGRADE	Article	Serbian spruce; Bosnian pine; Macedonian pine; RAPD markers	Studies were undertaken to identify genetic relationships among ten different species of the family Pinaceae through randomly amplified polymorphic DNA (RAPD) markers. Eighteen arbitrary RAPD primers produced 123 fragments of which 107 were polymorphic (87%). The similarity coefficient values varied from 0.34 to 0.67. The highest similarity coefficient was detected between Pinus wallichiana and P…	2013	45	2	http://dx.doi.org/10.2298/GENSR1302493K	WOS:000328504900020
580	J	Alexandru, AM; Mihai, G; Stoica, E; Curtu, AL	Multi-Trait Selection and Stability in Norway Spruce (<i>Picea abies</i>) Provenance Trials in Romania	FORESTS	Article	Norway spruce; provenance trials; stability; GxE interaction; multi-trait selection	Provenance trials replicated in multiple environments allow the selection of populations with high and stable performances. In this study, two methods have been applied to select stable Norway spruce provenances with high performances in three provenance trials established in Romania in 1972, where 81 provenances have been tested. Four traits were assessed: total and pruned height, diameter at br…	2023	14	3	http://dx.doi.org/10.3390/f14030456	WOS:000955698300001
581	J	Skroppa, T; Solvin, TM; Steffenrem, A	Diallel crosses in <i>Picea abies</i> VI. Genetic variation in early reproduction in three young Norway spruce progeny trials	SILVAE GENETICA	Article	Norway spruce; half diallels; precocious flowering; cone production; tree height; genetic parameters	Female flowering and cone production took place in three Norway spruce progeny tests at ages 17 and 20 years, each planted with full-sib families from a half diallel. The number of cones on individual trees were scored in five classes. More than 50 % of the trees produced cones, and a considerable variation was found among families for the ability to produce cones (precocity) and for the number o…	2024	73	1	http://dx.doi.org/10.2478/sg-2024-0014	WOS:001341701300001
582	J	Jansen, S; Geburek, T	Historic translocations of European larch (<i>Larix decidua</i> Mill.) genetic resources across Europe - A review from the 17th until the mid-20th century	FOREST ECOLOGY AND MANAGEMENT	Review	Transfer of genetic material; Genetic pollution; Human-mediated gene-flow; Afforestation; European larch	For the first time we have reviewed historic data throughout Europe to assess how European larch has been artificially distributed from the 17th until the mid-20th century. Over this period, larch genetic resources have been translocated with varying intensity. Especially Alpine plant material was transferred outside the native range across Europe, while genetic resources originating from the Sud…	2016	379		http://dx.doi.org/10.1016/j.foreco.2016.08.007	WOS:000383816600012
583	J	Krajmerová, D; Paule, L; Zhelev, P; Voleková, M; Evtimov, I; Gagov, V; Gömöry, D	Natural hybridization in eastern-Mediterranean firs: The case of <i>Abies</i> <i>borisii</i>-<i>regis</i>	PLANT BIOSYSTEMS	Article	Abies alba; Abies cephalonica; introgression; mitochondrial DNA; nuclear microsatellites; reticulate evolution	The genus Abies is represented in southern Balkans by A. alba, A. cephalonica, and A. borisii-regis. To infer the status of southern-Balkans firs, as well as the extent and patterns of introgression within this taxonomical complex, we analyzed genetic variation patterns of 29 indigenous fir populations in Bulgaria, Macedonia, Greece, and Calabria using a combination of maternally and biparentally…	2016	150	6	http://dx.doi.org/10.1080/11263504.2015.1011723	WOS:000388002200007
584	J	Fuchs, J; Jovtchev, G; Schubert, I	The chromosomal distribution of histone methylation marks in gymnosperms differs from that of angiosperms	CHROMOSOME RESEARCH	Article	euchromatin; genome size estimation; heterochromatin; histone methylation; Pinaceae	The chromosomal distribution of seven histone methylation marks (H3K4me2, H3K9me1,2,3 and H3K27me1,2,3) was analysed in the gymnosperm species Pinus sylvestris and Picea abies. Similarly to the situation in other investigated eukaryotes, dimethylation of lysine 4 of histone H3 is restricted to euchromatin in gymnosperms. Surprisingly, also H3K9me1-a mark classified as heterochromatin-specific in …	2008	16	6	http://dx.doi.org/10.1007/s10577-008-1252-4	WOS:000259272200007
585	J	Jansons, A; Donis, J; Danusevicius, D; Baumanis, I	Differential Analysis for Next Breeding Cycle for Norway Spruce in Latvia	BALTIC FORESTRY	Article	Picea abies; breeding strategy; financial revenue; genetic gain; equivalent annual annuity	Breeding in the most of the Baltic Sea region countries has been used as an important tool to improve target traits of forest trees for more than 60 years. Its basis is an extensive plus -tree selection: in Latvia alone 1700 Norway spruces were identified and their open pollinated progeny tests established. Despite this effort and proven superiority of the selected material, during the last decad…	2015	21	2		WOS:000368757900013
586	J	Berlin, M; Jansson, G; Högberg, KA; Helmersson, A	Analysis of non-additive genetic effects in Norway spruce	TREE GENETICS & GENOMES	Article	Picea abies; Genetic gain; Heritability; G x E; Additive effects; Epistasis; Dominance	Genetic variance includes both additive and non-additive components, and the latter can be partitioned into dominance and epistatic variance. Additive genetic variance has been the main source of genetic improvement in most tree breeding programs and the genetic gain achieved has mostly been deployed through open-pollinated seed orchards. However, non-additive effects could be exploited in altern…	2019	15	3	http://dx.doi.org/10.1007/s11295-019-1350-9	WOS:000467646700001
587	J	Lin, CP; Huang, JP; Wu, CS; Hsu, CY; Chaw, SM	Comparative Chloroplast Genomics Reveals the Evolution of Pinaceae Genera and Subfamilies	GENOME BIOLOGY AND EVOLUTION	Article	chloroplast genome; Cedrus; Cathaya; Pesudotsuga; Pinaceae phylogeny; molecular dating	As the largest and the basal-most family of conifers, Pinaceae provides key insights into the evolutionary history of conifers. We present comparative chloroplast genomics and analysis of concatenated 49 chloroplast protein-coding genes common to 19 gymnosperms, including 15 species from 8 Pinaceous genera, to address the long-standing controversy about Pinaceae phylogeny. The complete cpDNAs of …	2010	2		http://dx.doi.org/10.1093/gbe/evq036	WOS:000280480000043
588	J	Gömöry, D; Krajmerová, D; Hrivnák, M; Longauer, R; Schmidtová, J	From allozymes to NGS: population genetics of forest trees in Slovakia in the past 40 years	BIOLOGIA	Review	Allozymes; Forest trees; Maternally inherited markers; Microsatellites; Next-generation sequencing; Sanger sequencing	This review summarizes the development of population genetics and population genomics studies of forest trees in Slovakia during the past 40 years. Various protein and DNA markers have been applied during this period to address several topics in evolutionary genetics and biogeography of trees: allozymes, uniparentally inherited chloroplast and mitochondrial markers, simple sequence repeats and si…	2021	76	7	http://dx.doi.org/10.1007/s11756-021-00712-1	WOS:000628090200001
589	J	Wu, CS; Lin, CP; Hsu, CY; Wang, RJ; Chaw, SM	Comparative Chloroplast Genomes of Pinaceae: Insights into the Mechanism of Diversified Genomic Organizations	GENOME BIOLOGY AND EVOLUTION	Article	Pinaceae; chloroplast genome; isoform; repeat; structural evolution	Pinaceae, the largest family of conifers, has diversified organizations of chloroplast genomes (cpDNAs) with the two typical inverted repeats (IRs) highly reduced. To unravel the mechanism of this genomic diversification, we examined the cpDNA organizations from 53 species of the ten Pinaceous genera, including those of Larix decidua (122,474 bp), Picea morrisonicola (124,168 bp), and Pseudotsuga…	2011	3		http://dx.doi.org/10.1093/gbe/evr026	WOS:000290252700029
[truncated: 160 more rows]
