# Supplementary material
Source: Research Square preprint supplement (doi:10.21203/rs.3.rs-9882196/v1)
Supplement: Supplementary file 3 [file 8856c92ee605ebc4b2856e52.xlsx]

## Sheet: ReadMe
This file contains the answers provided by AForGeN members in response to the survey
Date	Date when the answer was provided
1. What will be the three main research topics in the research field of alpine forest genomics in the future?	Survey question 1
Categorization Q1	Categorization of the answer for survey question 1
2. What would you study in alpine forest genomics if there were no constraints? List a maximum of three topics.	Survey question 2
Categorization Q2	Categorization of the answer for survey question 2
3. Where do you see the main challenges/constraints regarding these research topics in the future? List a maximum of three challenges.	Survey question 3
Categorization Q3	Categorization of the answer for survey question 3
4. What is missing so far in terms of resources in alpine forest genomics research? List a maximum of three resources.	Survey question 4
Categorization Q4	Categorization of the answer for survey question 4
5. How could AForGeN contribute to achieve the goals you listed in question 1 and overcome the challenges you listed in question 3?	Survey question 5
Categorization Q5	Categorization of the answer for survey question 5
6. From the researcher’s perspective, what and how can the field of alpine forest genomics contribute to applied activities like forest management or nature conservation? List a maximum of three topics.	Survey question 6
Categorization Q6	Categorization of the answer for survey question 6
Country	Country of the institute of the responding AForGeN member

## Sheet: survey_answers_categories
Date	1. What will be the three main research topics in the research field of alpine forest genomics in the future?	Categorization Q1	2. What would you study in alpine forest genomics if there were no constraints? List a maximum of three topics.	Categorization Q2	3. Where do you see the main challenges/constraints regarding these research topics in the future? List a maximum of three challenges.	Categorization Q3	4. What is missing so far in terms of resources in alpine forest genomics research? List a maximum of three resources.	Categorization Q4	5. How could AForGeN contribute to achieve the goals you listed in question 1 and overcome the challenges you listed in question 3?	Categorization Q5	6. From the researcher’s perspective, what and how can the field of alpine forest genomics contribute to applied activities like forest management or nature conservation? List a maximum of three topics.	Categorization Q6	Country
2024-11-11 10:13:06	1) Identification of adaptive genetic variation, 2) prediction of future maladaptation, 3) Generation of genomic resources (reference assemblies and population-scale re-sequencing data) and trial sites.	Adaptation genomics Genomic resources Experimental sites	1) The genomic and phenotypic variation, including structural variants by long-read sequencing, of large numbers of individuals. 2) The amount of phenotypic plasticity by large clonal common garden networks.	Structural variants Phenotypic plasticity & variation Experiments	1) Sample collection, 2) sequencing costs, 3) maintenance of trial sites	Sampling Costs Experimental sites	1) Genomic reference data, such as pangenomes and population-scale re-sequencing data, 2) common garden networks.	Genomic resources Experimental sites	By bringing together researchers to promote collaboration and coordinate research efforts. Potentially, the AForGeN could initiate and coordinate a proposal for a collaborative project funded by the EU.	Collaboration Coordination Joint projects	Potentially, results may predict differential future adaptability of populations and species. However, research should focus on scientific rigor rather than apparent applicability.	Adaptive genomic diversity	Germany
2024-11-13 11:28:03	building solid reference genome for conifers; local adaptation; climate change and range shifts	Adaptation genomics Genomic resources Elevational & range shifts	solid reference genomes for conifers; pangenomes for conifers; landscape genomics on a grand scale (e.g. a species across The Alps in great detail)	Genomic resources Structural variants Adaptation genomics	lack of solid reference genomes for conifers; lack of detailed documentation of forest history across landscapes; phenotyping and data collection in the field/forest	Genomic resources Documentation Sampling	solid reference genomes for conifers; pangenomes for conifers and also hardwood trees; large SNP databases and chips for most species	Genomic resources	building consortia for solid reference genomes; building networks for dense sampling of species across landscapes; coordination SNP resources	Coordination Networks	coping with climate change especially near mountain tops/treelines; managing the climate transition (from adapted today to adapted in the future with long rotation times/generation periods); understanding the effects of fragmentation and population sizes	Adaptive genomic diversity Effects of fragmentation	Austria
2024-11-13 20:26:06	- Genomic datasets that provide critical insights into adaptation of trees and their populations - Genomic background of forests' health, resistance against pathogens and pests, overcome epidemics - Unravel genetic diversity of forest tree species and populations to maintain ecosystem resilience, how to improve genetic material of forests	Adaptation genomics Pathogens & pests Genetic diversity Natural & artificial selection	Population diversity of Pinus sylvestris and P. cembra sustaining on different habitat types in East-Central Europe, Phylogeographical aspects of tree species in the Carpathian area Genomic study of conifer species adapted to extreme conditions	Genetic diversity Phylogeography Adaptation genomics	Local (institutional) challenge, lack of support Money	Institutional support Costs Experimental sites	money, young researchers, available founds	Funding Young researchers	For us Eastern European countries the only possibility is cooperation, joint research and finding the way to apply for European funds	Collaboration Joint projects	Genomics help unravelling adaptation potential, resilience of alpine plants. Full genome sequencing and annotation combined with genotype, phenotype, and environmental data from multiple sources can provide important information.	Adaptive genomic diversity Resilient material	Hungary
2024-11-15 10:16:06	inclusion of new types of genomic variation (structural variants, copy-number variants, TE-variation, etc.); dynamics of upward colonization (expansion load, adaptation lag, etc.); genomic offset	Structural variants Elevational & range shifts Adaptation genomics	temporal, i.e., across-generation aspects of adaptation with regard to colonization of new habitat in the course of upward migration	Adaptation genomics Elevational & range shifts	longevity of trees (long generation time to observe genomic changes in situ); need for setting up complex, resource-intensive, and long-term situ experimental approaches	Tree biology Experimental sites	reference genomes for numerous species, often with large/complex genomes; long-term experimental sites (provenance trials along elevational transects)	Genomic resources Experimental sites	concerted activities such as done for the Abies genome initiative, e.g. by setting up several experimental sites across mountain ranges	Coordination			Switzerland
2024-11-19 10:54:34	I think the future research in alpine forest genomics will likely focus on understanding climate adaptation and resilience to extreme environmental events, e.g. identifying genomic markers underlying stress tolerance, and predicting species' range shifts due to climate change. It's a hot topic in the current literature. Another aspect is that we will also focus on intraspecific biodiversity and g…	Adaptation genomics Elevational & range shifts Pathogens & pests Biotic interactions & microbiome Genetic diversity	With NO constraints, I would sequence and assemble genomes at the chromosome level of the major alpine forest species, irrespective of their genome size and complexity. I would then conduct population genomic studies on as many populations as possible with ecological relevance and focus on genomic basis of climate resilience in alpine. In parallel, I would explore plant-microbiome-genome interact…	Genomic resources Adaptation genomics Biotic interactions & microbiome	From my view, the main challenges include the limited availability of high-quality genomic data for many alpine plant and FUNGAL species, as alpine ecosystems are often underrepresented in genomic databases and are difficult to sample. Another major challenge is the analytical manpower we can afford. Today we generate more data (speaking of environmental and genomic data) that we can analyse in a…	Genomic resources Sampling Costs Computational power Co-operation Know-how	Alpine forest genomics research lacks comprehensive reference genomes at high contiguity for several keystone species, which slow down comparative and functional studies, including population genomics. Long-term and large-scale datasets that integrate genomic, environmental, and phenotypic data across altitudinal gradients are also scarce. Monitoring programs are not very attractive although they…	Genomic resources Phenotypic data Long-term monitoring	AForGeN may continue the production of shared genomic resources, such as high-quality reference genomes (if I'm not mistaken with Abies alba) and omics datasets, for key alpine forest species. By fostering collaborative networks and pooling expertise across disciplines, the network can tackle computational and analytical challenges in integrating complex datasets. Last but not least, AForGeN shou…	Collaboration Data sharing Talks/Training	From my researcher's perspective, alpine forest genomics can contribute to applied activities by providing i) insights into genetic-based conservation strategies, helping to identify genetically important populations for protection or restoration, ii) support for forest management practices by identifying species or genotypes with higher resilience to climate change, pests, and diseases (with a f…	Adaptive genomic diversity Management strategies Assisted migration & gene flow	Switzerland
2024-11-21 18:02:37	Adaption to changing climate, esp. due to drought, shift of elevation and upcomming pests	Adaptation genomics Elevational & range shifts Pathogens & pests	drought tolerance in fir, reststance against lecanosticta in pinus mugo, gene conservation of pinus cembra	Adaptation genomics Pathogens & pests Conservation	Lack of finances, Lack of genomic ressources, human Know-how and IT	Costs Genomic resources Know-how Computational power	genomic ressouces for pinus mugo, finalized genome of A. alba, resequencing of A. alba	Genomic resources	strengthen the network, keep annual meetings in alpine environment, prepare common project proposal	Networks Meetings Joint projects	define management strategies focusing especially on alpine forest ecosystems, establish network of conservation units based on genetic/ genomic data, elaborate strategies involving forest owners	Management strategies Genetic conservation units
2024-11-24 07:39:04	Phylogenomics, comparative genomics and population genomics of extreme alpine populations. Conservation genomics of alpine populations.	Phylogenetics/genomics Adaptation genomics Conservation	1. Genetic monitoring of extreme alpine populations. 2. Adaptive radiation in alpine species.	Genetic monitoring Adaptive radiation	1. Funding. 2. Appropriate experimental design. 3. Proper sampling.	Costs Experimental sites Sampling	1. Funding. 2. Sequenced genomes.	Genomic resources Funding	Facilitate collaborations, prepare an info / policy brief on alpine species / populations / genomics	Collaboration Science communication Lobbying	Contribute to: 1. Adaptive forest management, 2. Close-to-nature silviculture. 3. Conservation and Monitoring.	Management strategies Genetic conservation units Monitoring	Greece
2024-11-26 18:22:42	1) Genomic basis of climate change adaptation and resilience of alpine forests; 2) Adaptive diversity and adaptive potential of alpine forests, including also modelling of their adaptive evolution in the changing environment; 3) Genetic diversity and conservation of alpine forests.	Adaptation genomics Genetic diversity Conservation	1) genome sequencing, assembly and annotation of alpine forest species; 2) GWAS of adaptive traits and genotype-environment associations (GEAs) at the range-wide scale of alpine forest species; 3) comparative evolutionary genomics of alpine forest species;	Genomic resources Adaptation genomics Comparative genomics	1) limited funds; 2) insufficient genomic resources; 3) insufficient collaboration	Costs Genomic resources Co-operation	1) insufficient number of entire genome sequenced species; 2) insufficient transcriptome data; 3) insufficient population genomic data	Funding Young researchers	1) develop and submit joint grant proposal to the major national and international grant agencies and funding program; 2) more closely collaborate in analysis and sharing data	Joint projects Data sharing Collaboration	1) enhance adaptive management strategies by selecting resilient tree species or populations and providing basis for reforestation and afforestation, and for assisted migration; 2) genomic diversity assessments; 3) monitoring ecosystem health and climate Impact	Management strategies Adaptive genomic diversity Resilient material Monitoring	Germany
2024-11-27 16:25:18	1. Adaptation/allele frequency shifts at the upper and lower edge of high mountain forest ecosystems (late frost, drought). 2. Microbiome tree interactions in range shifts.	Adaptation genomics Biotic interactions & microbiome	1. Microbiome - tree interactions in germination processes 2. Molecular mechanisms of induction of shrubbiness and clonal reproduction at tree line ecotones. 3. Conifer full genome population genomic studies.	Biotic interactions & microbiome Tree line Adaptation genomics	1. Mechanistic understanding through mesocosm experiments and through knock-outs is still difficult to establish for many tree species. 2. Generation turnover under controlled environments, to assess epigenetic effects.	Tree biology Know-how Genomic resources	1. Well established - long-term common gardens / reciprocal transplants 2. Good reference genomes in conifer species. 3. Permanent phenotyping networks.	Genomic resources Experimental sites Phenotypic data	Establish common gardens or better - reactivate previously established ones. Establish phenotyping networks.	Joint projects Networks	Establish, whether local adaptation is a relevant thing in alpine forest ecosystems - or whether assisted migration can be introduced without hesitation.	Local adaptation Assisted migration & gene flow	Germany
2024-11-27 16:57:01	effects of warming climates and rising tree lines, selection at the seedling stage	Adaptation genomics Elevational & range shifts Natural & artificial selection	selection at the seedling stage	Natural & artificial selection	competing research topics on non-Alpine systems - Alpine systems are only an accessory study system for me	NA	replication, e.g., in other mountain systems or habitats where the alpine species occur -> a holisitc understanding of seletive pressures across life stages and in time	Replication Holistic understanding of selection	I am not very knowledgeable of the latest developments of Aforgen, so I don't know how to answer		advise on the importance of evolutionary processes for the adaptation of our forests, and point to the fact that management can actually represent very strong evolutionary forces - in the case of clear-cut and planting, management deliberately shuts our evolution and this can have very negative consequences for forest systems and their ecosystem services	Evolutionary processes Management strategies	France
2024-11-27 23:07:36	1. Characterization of tree species provenaces to use for assisted migration 2. Genetic variability in commercial tree seed stocks 3. Selection of genetic resistance to biotic and abiotic stresses by crosses, induced mutations and genome editing	Assisted migration & gene flow Natural & artificial selection Genetic diversity	1. Genetic variability of tree plantations and tree seed stocks 2. Genome editing for biotic/abiotic resistance in forest and ornamental trees 3. Study forest provenances by common gardens	Genetic diversity Natural & artificial selection Forest reproductive material Experiments Assisted migration & gene flow	1. Long biological cycles of forest trees 2. Biggest genomes among the forest trees 3. Huge natural genetic resouces still neglected	Tree biology Institutional support	1. Common gardens for the main forest alpine forest species 2. Specific fundings for research and developing for alpine forest genomics research	Experimental sites Funding	AForGeN should lead an EU COST Action with the aim to develop a long term forest genetic project in Europe	Joint projects Networks	I cannot reply to this question because lately I am not update on the activity		Italy
2024-11-28 10:53:54	the number of studies related to adaptation to environmental change will increase; development of new genomic resources; epigenetic processes in adaptation	Adaptation genomics Genomic resources Epigenetics/genomics	transcriptomic responses to environmental change	Transcriptomics	financial constrains; the lack of time to find real solutions due to accelerating climate change	Costs Pace of climate change	for some countries with alpine regions, the financial background	Funding	by creating opportunities for increased collaboration	Collaboration	by adressing the problems raised by forest practitioners	Management strategies	Hungary
2024-12-02 15:43:09	Climate change adaptation, Assisted migration, Reference genome assembly	Adaptation genomics Genomic resources Assisted migration & gene flow	Reciprocal transplants with altitudinal treatments, Reference genome assemblies of conifers	Genomic resources Experiments	Funding, Genomic resources, Long lifespan of trees	Costs Genomic resources Tree biology	Reference genome assemblies for Pinus cembra, Targeted capture set for Abies alba, Pangenomes	Genomic resources	Sharing genomic resources, Creating genomic resources, International collaboration	Collaboration Joint projects Data sharing	Assisted migration under climate change (provenance selection), Genetic monitoring of gene conservation units	Assisted migration & gene flow Genetic conservation units Monitoring	Switzerland
2024-12-02 16:35:15	(mal)adaptation under climate change, GWAS analysis, assisted gene flow/migration	Adaptation genomics Assisted migration & gene flow	reciprocal transplatation experiments (lots of sites and trees), full genome sequencing of these trials and of natural populations, in-depth phenotyping of ecophysiological traits	Phenotypic plasticity & variation Experiments Adaptation genomics	lack of funding to pay for sequencing and (wo)man power to analyse all the data	Costs	chromosome level genomes for all species with good annotation for most species, limited understanding of gene functions	Genomic resources Understanding of gene function	consortia-driven research proposals to aquire money for these resources (maybe at levels of ministries rather than normal resaearch funding bodies)	Joint projects	identify suitable provanance/species for resilient forests in the future, safeguarding genetic diversity	Resilient material Genetic conservation units	Germany
2024-12-02 16:43:31	adaptation to climate change (local scale, i.e. selection gradients, genetic architecture of adaptation, the role of microbiome in adaptation)	Adaptation genomics Biotic interactions & microbiome	evolvability in situ (in natural forests stands)	Evolvability	lack of genomic resources for minor species, general lack of understanding of local adaptation even in model species, lack of long term funding (i.e. not project based)	Genomic resources Know-how Costs	genomic resources (genome sequences) for minority species, common gardens, phenotypic information	Genomic resources Experimental sites Phenotypic data	sharing knowledge and resources, common long term projects (same research question in different environments), genome sequences of minor species	Data sharing Joint projects	provide basic knowledge on basic principles, tracking the effect of changing environment, education of foresters and conservationists	Monitoring Science communication	Slovenia
2024-12-03 10:30:21	Adaptation to climate change in mountainous environments; identification of seed sources bringing natural disease and pest resistance; construction of reference pangenomes for Alpine trees	Adaptation genomics Genomic resources Pathogens & pests Structural variants	Rapid polygenic adaptation along altitudinal gradients in the presence of interspecific competition; Impact of strongly biased reproductive success (sweepstake reproduction) on temporal selective patterns across life stages; Group (cooperative) selection§	Adaptation genomics Biotic interactions & microbiome Reproduction	Money; money; money	Costs	Reference pangenomes allowing the study of structural variants, etc; large scale common gardens testing a selected number of provenances in many many environments; cost-efficient technologies to sequence full genomes in conifers	Genomic resources	Creating strong links among members, to align research topics; lobbying for research projects; coordination of national initiatives	Collaboration Lobbying Coordination	Studying present and future adaptation patterns; identifying populations with interest for conservation or breeding; helping to develop "evolution-oriented" forest management	Adaptive genomic diversity Genetic conservation units Management strategies Breeding	France
2024-12-03 16:05:50	Local adaptation, epigenetics, the new "omics"	Adaptation genomics Epigenetics/genomics	Role of structural and epigenetic variation in local adaptaion	Structural variants Epigenetics/genomics Adaptation genomics	High quality reference genomes, computational ressources needed to deal with stupid conifers	Genomic resources Computational power	Chromosome level reference genomes, open access genotype/sequencing data	Genomic resources	Community based appraoch to "collect" funds to get nice reference genome, encourage members to open access existing data, arranging talks with newomics/epigenetics experts, launching a community web-server	Joint projects Talks/Training Data sharing Web-server	Identification suitable seed-sources for the future, highlighting gene conservation areas	Genetic conservation units Seed sources
2024-12-04 12:27:09	adaptation to climate change, tree pathogens, assisted migration	Genomic resources Pathogens & pests Assisted migration & gene flow	1- How and to which extent hybridization among tree species can spread adaptive genetic variation and how this process can be effectively incorporated in climate change mitigation actions; 2- Landscape genomics along environmental gradients with more complex environment characterization (e.g. soil, and species-interactions in addition to more frequently used climatic variables) and genomics (stru…	Hybridization Adaptation genomics Pathogens & pests Structural variants	Climate change proceeds at a very fast rate: lack of time (but long generation times); large genomes; structural variation.	Pace of climate change Tree biology	well reconstructed pangenomes (mostly); well characterized environments (mostly);	Genomic resources Environmental data	More and more efficient cooperation among research groups could speed up research and allow for a broader and deeper understanding of phenomena	Collaboration	locate adaptive genetic variation; assessment of conservation needs based on gen div, inbreeding; evaluate impact of management	Adaptive genomic diversity Management strategies	Austria
2024-12-09 15:42:49	Conservation, adaptation, diversity	Adaptation genomics Genetic diversity Conservation	Field and experimental data from as many tree species as possible from as many ecological gradients as possible to test genomic offset models	Experiments Adaptation genomics	Lack of funding in, and political interest for ecological research, lobbying for assisted migration and other oversimplistic solutions	Costs Institutional support	Time	Time	A more integrated network (how?), with funding and capacity to attract young researchers. Permanent plots in Protected Areas? Involving social scientists?	Coordination Broadening scope and expertise	Alpine forests are at the forefront of environmental change (linked mostly warning), thus are a relevant model for forest management and conservation, if only for monitoring or as a warning system	Management strategies Monitoring
2024-12-12 08:43:05	1) Genetic (-omic) basis of clinal (altitudinal) variation; 2) Demographics of marginal populations (at the front end of an upward migration); 3) Concepts to identify source populations for assisted gene flow (forest trees).	Adaptation genomics Assisted migration & gene flow Elevational & range shifts	1) Genomic signatures of clinal variation; 2) Drivers of adaptation along altitudinal gradients; 3) Evolution of marginal populations (I would combine common gardens with genetics/genomics).	Adaptation genomics Elevational & range shifts Experiments	1) To expand the study area beyond regional studies; 2) Setting up common garden trials.	Sampling Experimental sites	1) More common garden trials; 2) More interregional studies (e.g. using several mountain ranges to understand parallel patterns of adaptation).	Experimental sites	It is an excellent forum to establish collaborations in order to tackle these issues.	Collaboration	1) By identifying populations suitable for conservation; 2) By providing the research results needed to inform seed sourcing; 3) By delivering results useful for breeding of forest trees.	Genetic conservation units Seed sources Breeding	Germany
2024-12-12 09:38:48	1/ the spatial scale of local adaptation 2/ the interplay of migration, selection, and climate change at the landscape scale 3/ the genomic offset patterns caused by the non-linear relationship of climate change with elevation	Adaptation genomics	1/ the interplay of all major compartiments of forest biological communities in local adaptation 2/ the above, on multiple gradients & with large numbers of individual trees 3/ in situ study of GxE & epigenetics	Biotic interactions & microbiome Epigenetics/genomics	1/ insufficient historical record to properly control for demography 2/ duly taking into account the effect of management 3/ theoretical background for multi-locus adaptation	Documentation Know-how	1/ dedicated common gardens 2/ development of fully reliable interpolation methods to estimate local-scale climate predictions 3/ same as (2), but for soils	Experimental sites Environmental data	Strengthen interdisciplinary exchange with other research fields that the questions and challenges listed above require	Collaboration	1/ inspire evolution(ary potential)-based management and conservation 2/ refine assisted gene flow strategies (particularly at the landscape scale) 3/ in general, bringing to the fore the processes occurring in rugged ladscapes	Management strategies Evolutionary processes Assisted migration & gene flow	France
2024-12-12 17:53:56	Climate change adaptation, land conversion, assisted migration	Adaptation genomics Assisted migration & gene flow Land use	Genomic analysis in replicated sites.	Adaptation genomics	Bioinformatics, funding, finding staff	Computational power Costs Know-how	Reference genomes	Genomic resources	Collaboration	Collaboration	Informing forest management, outreach to the general public	Management strategies Science communication
2024-12-12 18:24:09	Adaptation in the face of gene flow Genetic and epigentic responses to envrionmental change Structural variation and adaptation	Adaptation genomics Epigenetics/genomics Structural variants	Genetic and epigentic responses to envrionmental change	Adaptation genomics Epigenetics/genomics	Establishment of common gardens	Experimental sites	Common gardens (?), reference genomes	Genomic resources Experimental sites	Common research sites, methods, genetic and biomarkers	Collaboration Coordination	Conservation of adaptive diversity	Adaptive genomic diversity	Germany
2024-12-13 11:31:01	- Tracking latitudinal migration among sky islands across boundaries between genetic lineages (quite frequent in Mediterranean montain chains) - Assessing adaptive dynamics of above-the-treeline colonization - Confirming selection signals from landscape genomics through temporal analyses across generations	Adaptation genomics Elevational & range shifts	- Fine-scale reproductive patterns through large-scale parentage analyses plots - Testing potentially adaptive genotypes through reciprocal transplant experiments after controlled crosses - Dendrogenomic assessment of maladaptive signals at the upper altitudinal limit	Reproduction Adaptation genomics Experiments Natural & artificial selection	- Mostly lab work for intensively sampled sites, the amount of field work for common garden-like studies, limited previously available knowledge to correctly set up latitudinal and altitudinal migration studies	Know-how Experimental sites	- reference genomes for conifers, solid knowledge about candidate genes related to stressors linked to altitudinal migration, for most species well-established genotyping tools (SNP chip, SPET designs) favouring data mixing, genotyping tools for studying convergent local adaptation	Genomic resources Understanding of gene function	Maybe promoting the establishment of a few AForGen intensively samples sites; coordinating the use of common genotyping tools in regional research initiatives on adaptive dynamics	Joint projects Coordination	- Inform assisted migration initiatives (that unfortunately are growing erratically) through, for instance, results from genomic offset studies - Assist forest restoration projects involving fragmented populations (we are doing that for Silver fir remnants in Northern Apennines) to reverse the effect of genetic drift - understand the potential adaptive values of planted material through the recon…	Assisted migration & gene flow Management strategies	Italy
2025-01-07 11:57:50	development of reference genomes, gentoype-environment associations, genomic offset	Adaptation genomics Genomic resources	adaptive role of hybridization along elevational gradients, the spatial scale of selection, identification of populations with conservation concern	Hybridization Adaptation genomics Conservation	limitations due to very large genomes in conifers, limited research funding for non model species, lack of documentation of past forest management and plantations	Tree biology Costs Documentation	reference genomes, documentation of past forest management and plantations	Genomic resources Environmental data	community effort to develop a new reference genome, joint project proposal	Joint projects Collaboration	raise awareness for the importance to document forest management, recommendations for conservation management	Management strategies Science communication	Germany
