# Supplementary material
Source: Research Square preprint supplement (doi:10.21203/rs.3.rs-9882196/v1)
Supplement: Supplementary file 4 [file c6280c3ca570271f0e002280.xlsx]

## Sheet: Sheet1
Table S5: Genomic resources of the seven studied mountainous conifers and their related species
Studied species	Published nuclear reference genome assembly [version; (NCBI) accession number or link; reference]	Not (yet) published reference genome assembly [reference]	Transcriptome assembly [reference]	Plastid genome assembly [reference]	Mitochondrial genome assembly [reference]
Abies alba	Abal.1_1; https://treegenesdb.org/FTP/Genomes/Abal/; Mosca et al. (2019)		Roschanski et al. (2013)	Li et al. (2019)	Kersten et al. (2022)
Larix decidua	NA		NA	Wu et al. (2011)	NA
Larix sibirica	LarixSibirica0.16; GCA_004151065.36; Kuzmin et al. (2019), Bondar et al. (2022)		NA	Bondar et al. (2019)	NCBI GenBank MT797187-MT797195; Putintseva et al. (2020)
Picea abies	Pabies01; GCA_900067695.1; Nystedt et al. (2013)	chromosome level assembly: Nilsson et al. (2025)	Heer et al. (2016), Nilsson et al. (2025)	Nystedt et al. (2013)	Sullivan et al. (2019)
Pinus cembra	NA		Rellstab et al. (2019), Köbölkuti et al. (2021)	NA	NA
Pinus mugo	NA		NA	Sokolowska et al. (2021)	NA
Pinus sibirica	NA		NA	Baturina et al. (2019)
Related species	Published nuclear reference genome assembly [version; (NCBI) accession number or link; reference]	Not (yet) published reference genome assembly [reference]
Larix kaempferii	LKA_r1.0; GCA_027924585.1; Shirasawa et al. (2024)
Larix kaempferii	version 1.0; GWH PRJNA58704-1, https://ngdc.cncb.ac.cn/gwh/Assembly/24470/show; Sun et al. (2022)
Pinus albicaulis	WBP_1.0; GCA_034641835.3; Neale et al. (2024)
Pinus lambertiana	Pila.1_5; https://treegenesdb.org/org/Pinus-lambertiana; Stevens et al. (2016)
Picea mariana	Pmariana_40-10-1_v1; GCA_032191745.1; Lo et al. (2024)
Pinus massoniana	NA; PRJNA1240911; Chen et al. (2025)
Pinus sylvestris	NA	chromosome level assembly: Nilsson et al. (2025)
Pinus tabuliformis	CPIR1; GCA_031772625.1; Niu et al. (2022)
Pinus taeda	Ptaeda2.0; GCA_000404065.3; Zimin et al. (2017), Neale et al. (2014)
References
Baturina O et al. (2019) The complete chloroplast genome sequences of Pinus sibirica Du Tour. Mitochondrial DNA Part B 4:286-287. https://doi.org/10.1080/23802359.2018.1542983
Bondar EI et al. (2022) Annotation of Siberian Larch (Laryx sibirica Ledeb.) nuclear genome – One of the most cold-resistant tree species in the only deciduous GENUS in Pinaceae. Plants 11:2062. https://doi.org/10.3390/plants11152062
Bondar EI et al. (2019) Siberian larch (Laryx sibirica Ledeb.) chloroplast genome and development of polymorphic chloroplast markers. Bmc Bioinformatics 20:38. https://doi.org/10.1186/s12859-018-2571-x
Chen H et al. (2025) Chromosome-level genome assembly of Pinus massoniana provides insights into conifer adaptive evolution. Gigascience 14:giaf056. https://doi.org/10.1093/gigascience/giaf056
Heer K et al. (2016) Detection of SNPs based on transcriptome sequencing in Norway spruce (Picea abies (L.) Karst). Conservation Genetics Resources 8:105-107. https://doi.org/10.1007/s12686-016-0520-4
Kersten B et al. (2022) The mitochondrial genome sequence of Abies alba Mill. reveals a high structural and combinatorial variation. Bmc Genomics 23:776. https://doi.org/10.1186/s12864-022-08993-9
Köbölkuti ZA et al. (2020) SNP marker development in Pinus sylvestris L. in stress-responsive genes characterized from Pinus cembra L. transcriptomes. Molecular Biology Reports 47:4841-4847. https://doi.org/10.1007/s11033-020-05527-y
Kuzmin DA et al. (2019) Stepwise large genome assembly approach: a case of Siberian larch (Larix sibirica Ledeb). Bmc Bioinformatics 20 https://doi.org/10.1186/s12859-018-2570-y
Li GY et al. (2019) Next-generation sequencing yields the complete chloroplast genome of Abies alba. Mitochondrial DNA Part B-Resources 4:575-576. https://doi.org/10.1080/23802359.2018.1558122
Lo T et al. (2023) Assembly and annotation of the black spruce genome provide insights on spruce phylogeny and evolution of stress response. G3-Genes Genomes Genetics 14:jkad247. https://doi.org/10.1093/g3journal/jkad247
Mosca E et al. (2019) A reference genome sequence for the European silver fir (Abies alba Mill.): A community-generated genomic resource. G3-Genes Genomes Genetics 9:2039-2049. https://doi.org/10.1534/g3.119.400083
Neale DB et al. (2014) Decoding the massive genome of loblolly pine using haploid DNA and novel assembly strategies. Genome Biology 15:13. https://doi.org/10.1186/gb-2014-15-3-r59
Neale DB et al. (2024) A genome sequence for the threatened whitebark pine. G3-Genes Genomes Genetics 14:jkae061. https://doi.org/10.1093/g3journal/jkae061
Nilsson O et al. (2025) 1000 conifer genomes: Genome innovation, organisation and diversity. Research Square:preprint. https://doi.org/10.21203/rs.3.rs-6502828/v1
Niu SH et al. (2022) The Chinese pine genome and methylome unveil key features of conifer evolution. Cell 185:204-217.e214. https://doi.org/10.1016/j.cell.2021.12.006
Nystedt B et al. (2013) The Norway spruce genome sequence and conifer genome evolution. Nature 497:579-584. https://doi.org/10.1038/nature12211
Putintseva YA et al. (2020) Siberian larch (Larix sibirica Ledeb.) mitochondrial genome assembled using both short and long nucleotide sequence reads is currently the largest known mitogenome. Bmc Genomics 21:654. https://doi.org/10.1186/s12864-020-07061-4
Rellstab C et al. (2019) Using transcriptome sequencing and pooled exome capture to study local adaptation in the giga-genome of Pinus cembra. Molecular Ecology Resources 19:536-551. https://doi.org/10.1111/1755-0998.12986
Roschanski AM et al. (2013) Annotation and re-sequencing of genes from de novo transcriptome assembly of Abies alba (Pinaceae). Applications in Plant Sciences 1:1200179. https://doi.org/10.3732/apps.1200179
Shirasawa K et al. (2024) Haplotype-resolved de novo genome assemblies of four coniferous tree species. Journal of Forest Research 29:151-157. https://doi.org/10.1080/13416979.2023.2267304
Sokolowska J et al. (2021) New insight into taxonomy of european mountain pines, Pinus mugo complex, based on complete chloroplast genomes sequencing. Plants 10:1331. https://doi.org/10.3390/plants10071331
Stevens KA et al. (2016) Sequence of the sugar pine megagenome. Genetics 204:1613-1626. https://doi.org/10.1534/genetics.116.193227
Sullivan AR et al. (2020) The mitogenome of Norway Spruce and a reappraisal of mitochondrial recombination in plants. Genome Biology and Evolution 12:3586-3598. https://doi.org/10.1093/gbe/evz263
Sun C et al. (2022) The Larix kaempferi genome reveals new insights into wood properties. Journal of Integrative Plant Biology 64:1364-1373. https://doi.org/10.1111/jipb.13265
Wu CS et al. (2011) Comparative chloroplast genomes of Pinaceae: Insights into the mechanism of diversified genomic organizations. Genome Biology and Evolution 3:309-319. https://doi.org/10.1093/gbe/evr026
Zimin A et al. (2014) Sequencing and assembly of the 22-Gb loblolly pine genome. Genetics 196:875-890. https://doi.org/10.1534/genetics.113.159715
